# Supplementary material for: Quantifying concordant genetic effects of de novo mutations on multiple disorders
Source: eLife. 2022 Jun 6;11:e75551. doi: 10.7554/eLife.75551 (PMC9217133; doi:10.7554/eLife.75551)
Supplement: Supplementary file 1. [file elife-75551-supp1.xlsx]

## Sheet: STable 1
Supplementary Table 1. Sample size and reference for DNM datasets
Disorder	Abbreviation	Reference	Number of trios
Developmental disorder	DD	Kaplanis, Joanna, et al. "Evidence for 28 genetic disorders discovered by combining healthcare and research data." Nature 586.7831 (2020): 757-762.	31058
Autism spectrum disorder	ASD	Satterstrom, F. Kyle, et al. "Large-scale exome sequencing study implicates both developmental and functional changes in the neurobiology of autism." Cell 180.3 (2020): 568-584.	6430
Schizophrenia	SCZ	Howrigan, Daniel P., et al. "Exome sequencing in schizophrenia-affected parent–offspring trios reveals risk conferred by protein-coding de novo mutations." Nature neuroscience 23.2 (2020): 185-193.	2772
Congenital heart disease	CHD	Jin, Sheng Chih, et al. "Contribution of rare inherited and de novo variants in 2,871 congenital heart disease probands." Nature genetics 49.11 (2017): 1593.	2645
Intellectual disability	ID	Lelieveld, Stefan H., et al. "Meta-analysis of 2,104 trios provides support for 10 new genes for intellectual disability." Nature neuroscience 19.9 (2016): 1194-1196.	820
Tourette disorder	TD	Willsey, A. Jeremy, et al. "De novo coding variants are strongly associated with Tourette disorder." Neuron 94.3 (2017): 486-499.	484
Epileptic encephalopathy	EP	Allen, Andrew S., et al. "De novo mutations in epileptic encephalopathies." Nature 501.7466 (2013): 217.	264
Cerebral palsy	CP	Jin, Sheng Chih, et al. "Mutations disrupting neuritogenesis genes confer risk for cerebral palsy." Nature Genetics 52.10 (2020): 1046-1056.	250
Congenital hydrocephalus	CH	Jin, Sheng Chih, et al. "Exome sequencing implicates genetic disruption of prenatal neuro-gliogenesis in sporadic congenital hydrocephalus." Nature medicine 26.11 (2020): 1754-1765.	232
Control	Ctrl	Krumm, Niklas, et al. "Excess of rare, inherited truncating mutations in autism." Nature genetics 47.6 (2015): 582-588.	1789

## Sheet: STable 2
Supplementary Table 2. Likelihood ratio tests
Trait	Variant class	pval
DD	LoF	1e-300
DD	Dmis	1e-300
DD	Tmis	1e-300
DD	synonymous	5.96106e-40
ASD	LoF	3.99726e-173
ASD	Dmis	6.29361e-50
ASD	Tmis	9.96155e-09
ASD	synonymous	1.96066e-07
SCZ	LoF	3.67252e-07
SCZ	Dmis	1
SCZ	Tmis	0.224355
SCZ	synonymous	0.132085
CHD	LoF	1.17359e-61
CHD	Dmis	1.52288e-23
CHD	Tmis	5.97998e-06
CHD	synonymous	0.689094
ID	LoF	6.1952e-109
ID	Dmis	1.81454e-18
ID	Tmis	8.75823e-08
ID	synonymous	0.177147
TD	LoF	0.00104197
TD	Dmis	0.392344
TD	Tmis	1
TD	synonymous	1
EP	LoF	4.78173e-08
EP	Dmis	5.79403e-21
EP	Tmis	0.709663
EP	synonymous	0.324212
CP	LoF	0.000275985
CP	Dmis	1.02049e-10
CP	Tmis	0.0653639
CP	synonymous	0.998383
CH	LoF	6.91553e-12
CH	Dmis	0.138413
CH	Tmis	1.81438e-18
CH	synonymous	1
Likelihood ratio test shows significantly improved goodness of fit of the mixed-effects Poisson model compared to a fixed-effects model without the deviation component. Results with p-value<1E-300 are truncated to 1E-300 due to numerical rounding in computation.

## Sheet: STable 3
Supplementary Table 3. Exome-wide enrichment correlation estimates
Trait1	Trait2	Variant class	ρ	s.e.	s.e. method	pval	qval	FDR<0.05
DD	ASD	LoF	0.746574	0.0212749	FisherInfo	9.00462e-270	3.24e-268	*
DD	ASD	Dmis	0.863441	0.0196757	FisherInfo	0	0	*
DD	ASD	Tmis	0.579099	0.0579103	FisherInfo	1.52488e-23	2.736e-22	*
DD	ASD	synonymous	0.431175	0.140207	FisherInfo	0.00210303	0.0171818	*
DD	SCZ	LoF	0.350333	0.113206	FisherInfo	0.00197048	0.0168857	*
DD	SCZ	Dmis	0.48072	0.228396	FisherInfo	0.0353112	0.219103
DD	SCZ	Tmis	0.30787	0.154925	FisherInfo	0.0468986	0.272323
DD	SCZ	synonymous	0.00770914	0.166653	FisherInfo	0.963104	1.23814
ASD	SCZ	LoF	0.39445	0.15644	FisherInfo	0.0116886	0.078
ASD	SCZ	Dmis	0.418572	0.3842	FisherInfo	0.27595	0.92
ASD	SCZ	Tmis	0.677801	0.230825	FisherInfo	0.0033202	0.023904	*
ASD	SCZ	synonymous	0.227484	0.411709	FisherInfo	0.580582	1.34077
DD	CHD	LoF	0.666738	0.0222916	FisherInfo	1.46781e-196	4.41e-195	*
DD	CHD	Dmis	0.174453	0.0342784	FisherInfo	3.59361e-07	4.61571e-06	*
DD	CHD	Tmis	0.408546	0.0574708	FisherInfo	1.17086e-12	1.755e-11	*
DD	CHD	synonymous	0.00977243	0.0104331	Jackknife	0.348925	1.06475
ASD	CHD	LoF	0.544135	0.106629	FisherInfo	3.34213e-07	4.61571e-06	*
ASD	CHD	Dmis	0.156594	0.370933	FisherInfo	0.672906	1.33121
ASD	CHD	Tmis	0.235674	0.228661	FisherInfo	0.302696	0.956842
ASD	CHD	synonymous	0.0109457	0.248287	FisherInfo	0.964837	1.23191
SCZ	CHD	LoF	0.231216	0.219623	FisherInfo	0.29244	0.955636
SCZ	CHD	Dmis	-0.18807	1.26058	FisherInfo	0.881401	1.3215
SCZ	CHD	Tmis	0.00758286	0.504492	FisherInfo	0.988008	1.12557
SCZ	CHD	synonymous	0.189552	0.233843	FisherInfo	0.417599	1.09043
DD	ID	LoF	0.999781	0.00324621	Jackknife	0	0	*
DD	ID	Dmis	0.999535	0.00243894	FisherInfo	0	0	*
DD	ID	Tmis	0.999359	0.00914217	FisherInfo	0	0	*
DD	ID	synonymous	0.0532691	0.174878	FisherInfo	0.760666	1.3698
ASD	ID	LoF	0.946931	0.0609193	FisherInfo	1.74654e-54	4.5e-53	*
ASD	ID	Dmis	0.590089	0.15679	FisherInfo	0.000167509	0.00159158	*
ASD	ID	Tmis	0.517384	0.196735	FisherInfo	0.00854236	0.0591231
ASD	ID	synonymous	0.00255813	0.0479064	FisherInfo	0.957414	1.24826
SCZ	ID	LoF	0.614104	0.14874	FisherInfo	3.64817e-05	0.000386471	*
SCZ	ID	Dmis	0.251489	1.77271	FisherInfo	0.887185	1.29805
SCZ	ID	Tmis	0.478497	0.29898	FisherInfo	0.109503	0.507692
SCZ	ID	synonymous	0.0490769	0.425002	FisherInfo	0.908069	1.30752
CHD	ID	LoF	0.667899	0.0628492	FisherInfo	2.2315e-26	4.46e-25	*
CHD	ID	Dmis	0.208808	2.2685	FisherInfo	0.926661	1.29349
CHD	ID	Tmis	0.307146	0.264002	FisherInfo	0.244658	0.848077
CHD	ID	synonymous	0.00193179	0.334164	Jackknife	0.995387	1.08545
DD	TD	LoF	0.064818	0.323561	FisherInfo	0.841225	1.35161
DD	TD	Dmis	0.0247401	0.422822	Jackknife	0.953341	1.26132
DD	TD	Tmis	0.0070642	0.0055139	Jackknife	0.200137	0.734694
DD	TD	synonymous	0.0028797	0.00342072	Jackknife	0.399877	1.09091
ASD	TD	LoF	0.198852	0.380764	FisherInfo	0.601501	1.37165
ASD	TD	Dmis	0.00825998	0.425411	FisherInfo	0.984509	1.16645
ASD	TD	Tmis	0.00678777	0.0049499	Jackknife	0.170283	0.665217
ASD	TD	synonymous	0.00546923	0.329997	FisherInfo	0.986777	1.13885
SCZ	TD	LoF	-0.693493	0.768224	FisherInfo	0.366673	1.08295
SCZ	TD	Dmis	-0.000994919	0.0420536	Jackknife	0.981125	1.1851
SCZ	TD	Tmis	0.00167626	0.00446258	Jackknife	0.707195	1.32563
SCZ	TD	synonymous	-0.00983654	0.360135	FisherInfo	0.97821	1.20575
CHD	TD	LoF	0.323582	0.345744	FisherInfo	0.349324	1.047
CHD	TD	Dmis	-0.00235715	1.43841	FisherInfo	0.998692	1.04547
CHD	TD	Tmis	0.00319817	0.00202346	Jackknife	0.113982	0.513
CHD	TD	synonymous	0.00181611	0.176424	Jackknife	0.991787	1.10907
ID	TD	LoF	0.189328	0.41344	FisherInfo	0.647001	1.35419
ID	TD	Dmis	0.021474	0.341141	FisherInfo	0.949808	1.26667
ID	TD	Tmis	-0.0222074	0.0160348	Jackknife	0.166069	0.664
ID	TD	synonymous	0.0683146	0.73694	FisherInfo	0.926142	1.30219
DD	EP	LoF	0.13585	0.310543	FisherInfo	0.661778	1.33888
DD	EP	Dmis	0.955889	0.0879131	FisherInfo	1.54833e-27	3.4875e-26	*
DD	EP	Tmis	0.0203286	0.0313381	Jackknife	0.516541	1.25757
DD	EP	synonymous	0.00442349	0.00524247	Jackknife	0.398793	1.12219
ASD	EP	LoF	0.00950582	0.366173	FisherInfo	0.979289	1.19878
ASD	EP	Dmis	0.796738	0.099244	FisherInfo	9.90095e-16	1.62e-14	*
ASD	EP	Tmis	0.00632551	0.0410248	Jackknife	0.877462	1.36086
ASD	EP	synonymous	-0.00153609	0.0098964	Jackknife	0.87665	1.34923
SCZ	EP	LoF	0.270793	0.642085	FisherInfo	0.673215	1.31674
SCZ	EP	Dmis	0.0322328	1.83029	FisherInfo	0.985949	1.15247
SCZ	EP	Tmis	0.00621141	0.415722	Jackknife	0.988079	1.11849
SCZ	EP	synonymous	-0.00206781	0.136891	Jackknife	0.987948	1.1115
CHD	EP	LoF	-0.176846	0.394488	FisherInfo	0.653943	1.33773
CHD	EP	Dmis	0.0260877	1.433	FisherInfo	0.985475	1.15882
CHD	EP	Tmis	-0.000988904	1.01415	FisherInfo	0.999222	1.03942
CHD	EP	synonymous	-0.00071851	0.169197	FisherInfo	0.996612	1.06189
ID	EP	LoF	0.17957	0.376058	FisherInfo	0.633002	1.38951
ID	EP	Dmis	0.582796	0.360205	FisherInfo	0.105672	0.502105
ID	EP	Tmis	0.0382946	0.17213	FisherInfo	0.823945	1.36073
ID	EP	synonymous	-0.0697188	0.243898	Jackknife	0.774991	1.36765
TD	EP	LoF	-0.626823	0.428134	FisherInfo	0.143171	0.585
TD	EP	Dmis	-0.370642	1.2336	FisherInfo	0.76383	1.36158
TD	EP	Tmis	-0.191399	2.22513	FisherInfo	0.931453	1.26955
TD	EP	synonymous	0.00243741	0.246376	Jackknife	0.992107	1.10222
DD	CP	LoF	0.120748	0.531893	FisherInfo	0.820412	1.36667
DD	CP	Dmis	0.246893	0.167388	FisherInfo	0.14022	0.586047
DD	CP	Tmis	0.0157301	0.0446169	Jackknife	0.724419	1.34351
DD	CP	synonymous	1.00954e-06	1.72495e-05	Jackknife	0.95333	1.25212
ASD	CP	LoF	0.811427	0.276062	FisherInfo	0.00328963	0.023904	*
ASD	CP	Dmis	0.46398	0.257134	FisherInfo	0.0711641	0.376941
ASD	CP	Tmis	0.00496056	0.049498	Jackknife	0.920172	1.30394
ASD	CP	synonymous	1.1421e-06	6.98346e-05	Jackknife	0.986952	1.13159
SCZ	CP	LoF	0.0412233	0.858447	FisherInfo	0.9617	1.24576
SCZ	CP	Dmis	0.352993	0.274505	FisherInfo	0.198468	0.7425
SCZ	CP	Tmis	-0.00194749	1.18819	FisherInfo	0.998692	1.03345
SCZ	CP	synonymous	0.0433127	0.0256875	Jackknife	0.0917686	0.472114
CHD	CP	LoF	0.88055	0.280697	FisherInfo	0.00170681	0.01539	*
CHD	CP	Dmis	0.202646	0.32024	FisherInfo	0.526867	1.24816
CHD	CP	Tmis	-0.00291251	0.822917	FisherInfo	0.997176	1.05565
CHD	CP	synonymous	0.00533443	0.00452231	Jackknife	0.238167	0.84
ID	CP	LoF	0.681598	0.175138	FisherInfo	9.95132e-05	0.000995	*
ID	CP	Dmis	0.687776	0.153635	FisherInfo	7.58133e-06	8.5275e-05	*
ID	CP	Tmis	0.004115	0.875949	FisherInfo	0.996252	1.08
ID	CP	synonymous	-0.0193131	0.225654	Jackknife	0.931795	1.26135
TD	CP	LoF	-0.611474	0.405495	FisherInfo	0.131562	0.579512
TD	CP	Dmis	0.116457	1.635	FisherInfo	0.943216	1.26672
TD	CP	Tmis	0.00115528	0.651212	FisherInfo	0.998585	1.02754
TD	CP	synonymous	0.650497	0.494523	FisherInfo	0.188374	0.72
EP	CP	LoF	0.0947567	0.304155	FisherInfo	0.755389	1.37273
EP	CP	Dmis	0.525041	0.289199	FisherInfo	0.0694475	0.378545
EP	CP	Tmis	0.10784	0.703222	Jackknife	0.878121	1.33932
EP	CP	synonymous	0.000167968	0.324435	Jackknife	0.999587	1
DD	CH	LoF	0.310371	0.165036	FisherInfo	0.0600224	0.3375
DD	CH	Dmis	0.0287324	0.195892	Jackknife	0.883389	1.30279
DD	CH	Tmis	0.0108672	0.121339	FisherInfo	0.928636	1.28631
DD	CH	synonymous	0.00633619	0.00515336	Jackknife	0.218874	0.7884
ASD	CH	LoF	0.727974	0.359016	FisherInfo	0.0425919	0.2556
ASD	CH	Dmis	0.0105571	0.292336	FisherInfo	0.971192	1.21375
ASD	CH	Tmis	0.0188056	0.524301	FisherInfo	0.971388	1.20538
ASD	CH	synonymous	0.0058575	0.014247	Jackknife	0.68097	1.31806
SCZ	CH	LoF	0.217712	0.292756	FisherInfo	0.45708	1.1425
SCZ	CH	Dmis	-0.00127378	0.071469	Jackknife	0.98578	1.14503
SCZ	CH	Tmis	0.159607	0.394082	FisherInfo	0.685471	1.3117
SCZ	CH	synonymous	0.0378245	0.175324	FisherInfo	0.82919	1.35655
CHD	CH	LoF	0.667659	0.282595	FisherInfo	0.0181472	0.116357
CHD	CH	Dmis	-0.00827829	1.76824	FisherInfo	0.996265	1.07353
CHD	CH	Tmis	0.0632709	0.23671	FisherInfo	0.789244	1.36558
CHD	CH	synonymous	-0.0134753	0.0276388	Jackknife	0.625869	1.39111
ID	CH	LoF	0.631629	0.208365	FisherInfo	0.00243457	0.0190174	*
ID	CH	Dmis	-0.449887	0.943229	FisherInfo	0.633387	1.37277
ID	CH	Tmis	-0.241501	0.412619	FisherInfo	0.558354	1.30442
ID	CH	synonymous	-0.0135914	0.153025	FisherInfo	0.929226	1.27649
TD	CH	LoF	-0.64175	0.718823	FisherInfo	0.371976	1.08
TD	CH	Dmis	0.000583048	0.44022	Jackknife	0.998943	1.0217
TD	CH	Tmis	0.100463	0.671522	Jackknife	0.881076	1.31058
TD	CH	synonymous	-0.00019219	0.306356	Jackknife	0.999499	1.01593
EP	CH	LoF	0.076646	0.289978	FisherInfo	0.791536	1.34491
EP	CH	Dmis	0.190607	0.226024	FisherInfo	0.399057	1.10492
EP	CH	Tmis	0.348189	0.771946	FisherInfo	0.651951	1.34897
EP	CH	synonymous	0.0185556	0.449415	FisherInfo	0.967066	1.22577
CP	CH	LoF	-0.0310299	0.250261	FisherInfo	0.901323	1.3079
CP	CH	Dmis	-0.25704	1.62479	FisherInfo	0.8743	1.38
CP	CH	Tmis	0.566254	0.124595	FisherInfo	5.49952e-06	6.6e-05	*
CP	CH	synonymous	-4.29357e-05	0.00531764	Jackknife	0.993558	1.09767
DD	Ctrl	LoF	0.0178308	0.0276865	FisherInfo	0.519559	1.248
DD	Ctrl	Dmis	-0.00102146	1.36598	FisherInfo	0.999403	1.01022
DD	Ctrl	Tmis	0.0407783	0.0394705	FisherInfo	0.301542	0.970714
DD	Ctrl	synonymous	0.00020215	0.0078882	FisherInfo	0.979555	1.19189
ASD	Ctrl	LoF	-0.0256501	0.65289	FisherInfo	0.968662	1.21972
ASD	Ctrl	Dmis	0.258282	0.797523	FisherInfo	0.746048	1.3702
ASD	Ctrl	Tmis	0.217794	0.284599	FisherInfo	0.444113	1.14171
ASD	Ctrl	synonymous	0.0167379	0.144268	FisherInfo	0.907637	1.29714
SCZ	Ctrl	LoF	0.24915	0.535354	FisherInfo	0.64165	1.35953
SCZ	Ctrl	Dmis	-0.00149785	0.40735	Jackknife	0.997066	1.04947
SCZ	Ctrl	Tmis	0.250678	0.582081	FisherInfo	0.666717	1.334
SCZ	Ctrl	synonymous	0.0551196	0.194911	FisherInfo	0.777335	1.35786
CHD	Ctrl	LoF	0.504158	0.302665	FisherInfo	0.0957672	0.479
CHD	Ctrl	Dmis	0.11238	0.578964	FisherInfo	0.846094	1.34761
CHD	Ctrl	Tmis	0.555338	0.371277	FisherInfo	0.134718	0.578571
CHD	Ctrl	synonymous	-0.133948	0.500975	FisherInfo	0.78918	1.35257
ID	Ctrl	LoF	-0.336821	0.866604	FisherInfo	0.697522	1.32253
ID	Ctrl	Dmis	-0.436947	0.581581	FisherInfo	0.452467	1.14592
ID	Ctrl	Tmis	0.0756051	0.350912	FisherInfo	0.829414	1.34432
ID	Ctrl	synonymous	0.202814	0.432554	FisherInfo	0.639158	1.36929
TD	Ctrl	LoF	0.707036	0.436002	FisherInfo	0.104882	0.510811
TD	Ctrl	Dmis	0.00182908	1.56135	FisherInfo	0.999065	1.00458
TD	Ctrl	Tmis	0.288748	1.88154	FisherInfo	0.878033	1.32807
TD	Ctrl	synonymous	0.196483	0.194744	Jackknife	0.31301	0.971379
EP	Ctrl	LoF	-0.00480363	0.855567	FisherInfo	0.99552	1.06714
EP	Ctrl	Dmis	-0.801587	0.957424	FisherInfo	0.402462	1.08
EP	Ctrl	Tmis	-0.0241829	1.18612	FisherInfo	0.983734	1.17298
EP	Ctrl	synonymous	-0.0446469	0.283294	FisherInfo	0.874772	1.36957
CP	Ctrl	LoF	-0.497128	0.60295	FisherInfo	0.409659	1.08529
CP	Ctrl	Dmis	-0.406149	0.581038	FisherInfo	0.484548	1.19589
CP	Ctrl	Tmis	-0.0278592	1.21102	FisherInfo	0.981647	1.1784
CP	Ctrl	synonymous	0.0250043	0.0224481	FisherInfo	0.265334	0.9
CH	Ctrl	LoF	0.459323	0.526777	FisherInfo	0.383236	1.09429
CH	Ctrl	Dmis	-0.0133423	1.67836	FisherInfo	0.993657	1.09098
CH	Ctrl	Tmis	0.182789	0.368433	FisherInfo	0.619805	1.395
CH	Ctrl	synonymous	0.0300275	0.122015	Jackknife	0.805608	1.35589
The column of ρ, s.e., pval, and qval represent the estimated enrichment correlation, its corresponding standard error, p value, and q value for each trait pair respectively using EncoreDNM. The column of s.e. method represents the method in calculating the standard error of enrichment correlation.

## Sheet: STable 4
Supplementary Table 4. Shared genes with LoF DNMs in 12 pairs of correlated disorders
Disorder pairs	DD-ASD	DD-ID	DD-CHD	DD-SCZ	ASD-ID	ASD-CHD	CHD-ID	SCZ-ID	ASD-CP	ID-CP	ID-CH	CHD-CP
Number of shared genes	294	135	129	96	54	39	23	11	6	4	3	2
Genes	ARID5B	ARID5B	ANK3	CUZD1	ARID5B	PTEN	KAT6B	LRP1	SLC12A3	GTF3C1	RAI1	ALK
	BTAF1	CPEB3	CHAT	EBF3	WAC	WAC	WAC	MED13L	PER1	TCF4	ASXL3	CTNNB1
	CSTF2T	EDRF1	HK1	MKI67	AHDC1	ASH1L	KMT2A	NBEA	TCF4	INSR	FBXO11
	EBF3	KAT6B	KAT6B	MPP7	KMT2A	AHNAK	POGZ	CHD8	LTN1	CTNNB1
	EIF3A	POLR3A	KIF11	SUFU	KMT5B	KMT2A	RPL5	POGZ	IGLL5
	LARP4B	PPRC1	PTEN	ZFYVE27	PHF21A	TECTA	SAMD11	MAGEL2	CTNNB1
	LDB1	WAC	WAC	ZMYND11	SRPRA	EP400	SRRM2	ICAM1
	PFKP	AHDC1	WAPL	ATP1A1	FCRL6	POLE	ABCC3	SCN2A
	PTEN	AMPD2	ZMIZ1	BCL9	MED13L	KDM5B	SMURF2	SPRED2
	SUFU	CASZ1	ASH1L	CACNA1S	NBEA	NIN	TLK2	KMT2C
	TCF7L2	DPAGT1	CD1C	DEAF1	CHD8	ZC3H14	CACNA1A	PUF60
	WAC	KMT2A	AMBRA1	DLG2	POGZ	POGZ	FIGN
	ZMYND11	KMT5B	CTR9	TENM4	CHD2	RYR3	EP300
	AHDC1	LDHC	ETS1	ABCD2	ANKRD11	SRRM2	SPRED2
	APH1A	LRFN4	GANAB	CHD4	SRCAP	KDM6B	CTNNB1
	ASH1L	OVCH2	GDPD4	GLIPR1L2	SRRM2	KIAA0100	SETD5
	ATP1A1	PHF21A	KMT2A	KMT2D	CLTC	PSMD12	ANK2
	ATP1B1	SCN4B	PHRF1	LRP1	PHF12	TANC2	ARID1B
	BSDC1	SRPRA	SART1	MED13L	PPM1D	TLK2	ACTB
	ALG9	CNST	ANKRD33	PTPRB	RAI1	MAVS	CDK13
	ATM	LRP1	EP400	RARG	TLK2	CUL3	KMT2C
	CAPRIN1	MED13L	HDAC7	TAOK3	ASXL3	MX1	CHD7
	CCDC87	PGAM5	KMT2D	HIVEP3	SETBP1	EP300	KAT6A
	CEP164	SCN8A	PCBP2	KLHL17	TCF4	LRRFIP1
	DSCAML1	SLC35E3	PLXNC1	FREM2	BICRA	SPRED2
	KMT2A	SLCO1A2	KDM5B	MYCBP2	PRR12	SPTBN1
	KMT5B	SOX5	CHAMP1	NBEA	ADNP	THADA
	MYRF	VPS37B	FRY	ZMYM2	BAZ2B	UBR3
	NFRKB	GATAD2B	MROH7	CHD8	BCL11A	CTNNB1
	NXPE4	IPO9	NOL9	HSP90AA1	DYRK1A	SETD5
	PHF21A	CCDC168	OMA1	NRXN3	SON	ANK2
	SHANK2	NBEA	MYH6	POGZ	FBXO11	CCSER1
	SRPRA	LRRC40	NIN	DNAAF4	ARVCF	NAA15
	STARD10	CHD8	NOVA1	MAGEL2	EP300	ARID1B
	TNKS1BP1	SAMD4A	SIPA1L1	RYR3	SHANK3	ZNF292
	CSDE1	POGZ	WDHD1	VPS13C	TCF20	KMT2C
	CUX2	CHD2	PLXNA2	SMG5	TNRC6B	ADGRB1
	EP400	MAGEL2	POGZ	SSBP3	SCN2A	KAT6A
	GRIN2B	MAN2A2	RABGAP1L	SZT2	SPRED2	NOTCH1
	HECTD4	NEO1	RNF207	TMEM183A	TBR1
	KNTC1	SLC12A6	ALDH1A2	TMEM201	TRIP12
	LRP6	ZNF609	MEIS2	SETD1A	CTNNB1
	MED13L	RPL5	RYR3	BPTF	FOXP1
	RASAL1	SAMD11	SMAD6	DNAH9	SETD2
	RIMBP2	ADCY7	SPTBN5	KDM6B	SETD5
	FMN2	ANKRD11	TCF12	SLC16A3	ANK2
	HIVEP3	CDH11	USP8	UNC45B	ARID1B
	HNRNPU	GSE1	RPL5	ZNF207	PHIP
	ILF2	GTF3C1	SAMD11	ZNF407	AKAP9
	KDM5B	HS3ST4	PKD1	ICAM1	FOXP2
	KIAA0754	SRCAP	SRRM2	KRI1	KMT2C
	FARP1	SRRM2	TNFRSF25	PAF1	KAT6A
	NBEA	USP7	UBR4	PTPRS	EHMT1
	SACS	VPS4A	CARD14	RYR1	PCSK5
	SERPINE3	CHD3	CEP95	SCAF1
	XPO4	CLTC	FTSJ3	SHANK1
	MSH4	DLG4	KANSL1	MYH7B
	NFIA	LRRC3C	KDM6B	C2orf76
	OBSCN	PHF12	KIAA0100	CHST10
	OLFM3	PPM1D	PFAS	ITSN1
	CEP128	RAI1	PIGS	FN1
	CHD8	RPL26	PSMD12	HOXD11
	DYNC1H1	SMURF2	SMURF2	DGCR8
	HECTD1	TLK2	TANC2	MYH9
	HSP90AA1	ASXL3	TLK2	MAP4K4
	IRF2BPL	CDH19	TP53	NEB
	NIN	SALL3	GREB1L	PIKFYVE
	SYNE2	SETBP1	ROCK1	SCN2A
	TRIP11	TCF4	SMAD2	SPRED2
	ZFYVE26	BICRA	ZNF407	CACNA2D2
	PLEKHO1	CACNA1A	ZNF521	CCDC39
	POGZ	COQ8B	ARHGAP35	CNTN3
	PRDM16	ICAM1	ASPDH	IQSEC1
	PRPF38B	INSR	CACNA1A	KPNA1
	RERE	NFIX	DAZAP1	LAMB2
	ANP32A	PRR12	MAP1S	PHF7
	CCPG1	RPS16	ASXL1	TRH
	CHD2	ADNP	JAG1	ANKRD17
	FBN1	ARHGAP15	ALK	FAM193A
	FURIN	ASXL2	CUL3	KIAA1109
	IREB2	BAZ2B	FEZ2	NIPBL
	LEO1	BCL11A	FIGN	PCDH1
	RFX7	DYRK1A	EP300	TRIO
	RPAP1	SIK1	HIRA	LAMA2
	RYR3	SON	MAP2	PKHD1
	SIN3A	FBXO11	SH3BP4	SOBP
	STARD9	FIGN	SPRED2	AUTS2
	SKI	INHA	SPTBN1	CUL1
	SPEN	ARVCF	THADA	DAGLB
	SRSF11	EP300	UBR3	EIF3B
	STRIP1	SERPIND1	ZEB2	KMT2C
	SUSD4	SHANK3	COPB2	SSPO
	ANKRD11	TCF20	CTNNB1	PUF60
	CTCF	TNRC6B	DNAJC13	RB1CC1
	GLYR1	NDUFS1	DOCK3	RGS22
	MBTPS1	ODC1	EIF4A2	TEK
	SRCAP	POU3F3	PHLDB2
	SRRM2	SATB2	POLQ
	ZC3H18	SCN2A	SETD5
	ZFHX3	SPRED2	TSEN2
	UBAP2L	TBR1	ANK2
	VAV3	TRIP12	FRYL
	ANKFN1	ACTL6A	NAA15
	BRCA1	CTNNB1	SPRY1
	CLTC	FOXP1	TBC1D19
	DNAH17	LHFPL4	UVSSA
	GGNBP2	SETD2	FAT2
	HAP1	SETD5	FLT4
	JUP	TRA2B	NSD1
	KDM6B	ZNF148	ARID1B
	KIAA0100	ZNF385D	TAB2
	MED13	ANK2	ZNF292
	MYH10	N4BP2	CDK13
	MYO19	MEGF10	KMT2C
	NF1	PPP2CA	WIPI2
	PER1	ARID1B	ADGRB1
	PHF12	CEP85L	CHD7
	PPM1D	MTHFD1L	CSMD3
	PSMD12	PHIP	EFR3A
	RAB40B	SYNCRIP	GATA4
	RAI1	AKAP9	KAT6A
	RNF213	CDK13	ZNF623
	TANC2	DNAH11	HNRNPK
	TAOK1	FOXP2	LHX2
	TLK2	KMT2C	NOTCH1
	ASXL3	SLC26A4	PRRC2B
	CELF4	CHD7	SVEP1
	ENOSF1	KAT6A	TSC1
	GAREM1	PRAG1	TYRP1
	LOXHD1	PUF60
	PIEZO2	SLC39A4
	SETBP1	TNKS
	TCF4	DOLPP1
	BICRA	EHMT1
	BRD4	PCSK5
	BRSK1
	CHAF1A
	CIC
	CNOT3
	DOT1L
	KMT2B
	MUC16
	POLRMT
	PRR12
	SCAF1
	SPTBN4
	TCF3
	USP29
	ZFP14
	ZNF560
	ADNP
	NCOA6
	PCSK2
	ZMYND8
	BAZ2B
	BCL11A
	CUL3
	DHX57
	BRWD1
	DYRK1A
	MORC3
	SON
	URB1
	DNMT3A
	FBXO11
	ARVCF
	CECR2
	EP300
	SHANK3
	TCF20
	TNRC6B
	LRP2
	MBD5
	MYT1L
	NRXN1
	PDE11A
	PRPF40A
	SCN2A
	SLC4A10
	SPRED2
	SPTBN1
	TBR1
	THADA
	TRIP12
	UBR3
	UNC80
	USP34
	ATP2B2
	CACNA2D3
	CTNNB1
	DVL3
	FOXP1
	GSK3B
	IGSF10
	ITPR1
	MSL2
	PHF7
	PLXNB1
	QRICH1
	RYBP
	SATB1
	SETD2
	SETD5
	SHQ1
	STAG1
	SUCLG2
	TBL1XR1
	THRB
	USF3
	ZBTB20
	ANK2
	ANKRD17
	ATP10D
	FAM200B
	FREM3
	GRIA2
	HNRNPD
	KDR
	KIAA0232
	NAA15
	NR3C2
	NSD2
	WDFY3
	WDR17
	CHD1
	EPB41L4A
	GPBP1
	GRAMD2B
	ITGA2
	JADE2
	LRRTM2
	MAP1B
	RANBP17
	TRIO
	ARID1B
	CASP8AP2
	DLL1
	DST
	HIVEP2
	HSP90AB1
	JARID2
	MDC1
	MDN1
	PHIP
	SYNE1
	SYNGAP1
	ZNF292
	AKAP9
	BAZ1B
	CTTNBP2
	CUL1
	FOXP2
	GIGYF1
	GRID2IP
	INTS1
	KCND2
	KMT2C
	KMT2E
	LRRC4
	NFE2L3
	RELN
	REPIN1
	SRPK2
	THSD7A
	ZKSCAN5
	ZNF107
	ADGRB1
	ASPH
	CNGB3
	DOCK5
	FAM91A1
	GSDMC
	KAT6A
	MTUS1
	PCM1
	PKHD1L1
	PSD3
	RIMS2
	UBR5
	XKR6
	CCDC171
	DOCK8
	EHMT1
	FUBP3
	GADD45G
	GARNL3
	NFIB
	NOTCH1
	PCSK5
	PHF2
	RFX3
	VCP
	ZNF462
	ZNF618

## Sheet: STable 5
Supplementary Table 5. Genes with LoF variants in multiple disorders
Gene	DD	ASD	SCZ	CHD	ID	TD	EP	CP	CH	Number of disorders
CTNNB1	67	3	0	2	4	0	0	3	0	5
NBEA	3	1	1	0	1	0	1	0	0	5
POGZ	41	6	1	2	7	0	0	0	0	5
SPRED2	2	1	1	1	1	0	0	0	0	5
KMT2C	14	4	2	1	1	0	0	0	0	5
PTEN	16	3	0	2	0	0	0	0	2	4
WAC	26	3	0	1	1	0	0	0	0	4
KMT2A	94	3	0	1	3	0	0	0	0	4
MED13L	50	5	1	0	1	0	0	0	0	4
KDM5B	19	3	0	3	0	1	0	0	0	4
CHD8	19	11	2	0	1	0	0	0	0	4
RYR3	2	1	1	1	0	0	0	0	0	4
ANKRD11	111	4	0	0	3	1	0	0	0	4
SRRM2	17	1	0	1	1	0	0	0	0	4
KDM6B	11	3	1	1	0	0	0	0	0	4
RAI1	9	2	0	0	1	0	0	0	1	4
TLK2	14	3	0	1	2	0	0	0	0	4
ASXL3	63	2	0	0	5	0	0	0	1	4
TCF4	32	2	0	0	1	0	0	1	0	4
FBXO11	6	1	0	0	1	0	0	0	1	4
EP300	35	1	0	1	1	0	0	0	0	4
SCN2A	27	9	1	0	3	0	0	0	0	4
SETD5	43	3	0	1	1	0	0	0	0	4
ANK2	5	4	0	1	1	0	0	0	0	4
ARID1B	130	7	0	1	6	0	0	0	0	4
KAT6A	54	1	0	1	1	0	0	0	0	4
This table shows 26 genes that harbor LoF variants in at least four disorders. The first column denote gene name, the second to the tenth columns denote number of DNMs for each disorder.

## Sheet: STable 6
Supplementary Table 6. GO enrichment analysis for genes with LoF variants in multiple disorders
Category	GeneSet	N_genes	N_overlap	p	adjusted_p
GO_bp	GO_CHROMATIN_ORGANIZATION	762	12	7.75432e-11	5.69942e-07
GO_bp	GO_CHROMOSOME_ORGANIZATION	1167	13	6.8197e-10	2.50624e-06
GO_bp	GO_POSITIVE_REGULATION_OF_GENE_EXPRESSION	1907	15	2.16626e-09	5.30734e-06
GO_bp	GO_COVALENT_CHROMATIN_MODIFICATION	453	9	4.42667e-09	8.13401e-06
GO_bp	GO_POSITIVE_REGULATION_OF_RNA_BIOSYNTHETIC_PROCESS	1577	12	2.81464e-07	0.000413752
GO_bp	GO_POSITIVE_REGULATION_OF_TRANSCRIPTION_BY_RNA_POLYMERASE_II	1165	10	1.36289e-06	0.00166954
GO_bp	GO_POSITIVE_REGULATION_OF_BIOSYNTHETIC_PROCESS	1939	12	2.60374e-06	0.00273393
GO_bp	GO_PROTEIN_METHYLATION	176	5	3.37548e-06	0.00310122
GO_bp	GO_PEPTIDYL_LYSINE_MODIFICATION	380	6	9.30251e-06	0.00759705
GO_bp	GO_PEPTIDYL_AMINO_ACID_MODIFICATION	1199	9	1.60879e-05	0.0118246
GO_bp	GO_ENSHEATHMENT_OF_NEURONS	122	4	2.04997e-05	0.0136975
GO_bp	GO_PEPTIDYL_LYSINE_METHYLATION	126	4	2.32752e-05	0.0142561
GO_bp	GO_RHYTHMIC_PROCESS	278	5	3.08869e-05	0.017463
GO_bp	GO_HISTONE_METHYLATION	138	4	3.32655e-05	0.0174644
GO_bp	GO_MACROMOLECULE_METHYLATION	296	5	4.16708e-05	0.0204187
GO_bp	GO_HISTONE_H3_K4_METHYLATION	56	3	5.75882e-05	0.0250092
GO_bp	GO_PEPTIDYL_LYSINE_ACETYLATION	159	4	5.78445e-05	0.0250092
GO_bp	GO_CHROMATIN_MEDIATED_MAINTENANCE_OF_TRANSCRIPTION	9	2	6.26153e-05	0.0255679
GO_bp	GO_POSITIVE_REGULATION_OF_GENE_EXPRESSION_EPIGENETIC	60	3	7.08381e-05	0.0269458
GO_bp	GO_CHROMATIN_REMODELING	169	4	7.33219e-05	0.0269458
GO_bp	GO_HISTONE_H4_ACETYLATION	65	3	9.00175e-05	0.0282079
GO_bp	GO_CELLULAR_RESPONSE_TO_DRUG	350	5	9.21668e-05	0.0282079
GO_bp	GO_REGULATION_OF_CHROMATIN_ORGANIZATION	180	4	9.3619e-05	0.0282079
GO_bp	GO_RESPONSE_TO_FUNGICIDE	11	2	9.55036e-05	0.0282079
GO_bp	GO_METHYLATION	353	5	9.59452e-05	0.0282079
GO_bp	GO_PROTEIN_ACETYLATION	190	4	0.000115369	0.0326139
GO_bp	GO_CIRCADIAN_RHYTHM	195	4	0.000127522	0.0347142
GO_bp	GO_REGULATION_OF_MEGAKARYOCYTE_DIFFERENTIATION	78	3	0.000154968	0.0386174
GO_bp	GO_DEVELOPMENTAL_GROWTH	629	6	0.000155294	0.0386174
GO_bp	GO_SYNAPTIC_VESICLE_CLUSTERING	14	2	0.000157622	0.0386174
GO_bp	GO_MYELOID_CELL_DIFFERENTIATION	402	5	0.000176333	0.041739
GO_bp	GO_PREPULSE_INHIBITION	15	2	0.000181721	0.041739
GO_bp	GO_POSITIVE_REGULATION_OF_HISTONE_H3_K4_METHYLATION	16	2	0.000207509	0.0448585
GO_bp	GO_NEGATIVE_REGULATION_OF_MORPHOGENESIS_OF_AN_EPITHELIUM	16	2	0.000207509	0.0448585
GO_cc	GO_NUCLEOPLASM_PART	1085	13	2.77792e-10	2.7807e-07
GO_cc	GO_HISTONE_METHYLTRANSFERASE_COMPLEX	86	6	1.41585e-09	7.08633e-07
GO_cc	GO_METHYLTRANSFERASE_COMPLEX	113	6	7.42752e-09	2.47832e-06
GO_cc	GO_TRANSFERASE_COMPLEX	763	10	2.65907e-08	6.65432e-06
GO_cc	GO_CATALYTIC_COMPLEX	1334	12	4.46241e-08	8.93375e-06
GO_cc	GO_NUCLEAR_CHROMATIN	368	6	7.74647e-06	0.00129237
GO_cc	GO_INTERCALATED_DISC	51	3	4.34578e-05	0.00611571
GO_cc	GO_CHROMOSOME	1050	8	4.88768e-05	0.00611571
GO_cc	GO_CHROMATIN	550	6	7.4289e-05	0.00782824
GO_cc	GO_MLL3_4_COMPLEX	10	2	7.82042e-05	0.00782824
GO_cc	GO_BETA_CATENIN_TCF_COMPLEX	11	2	9.55036e-05	0.00869082
GO_cc	GO_NUCLEAR_CHROMOSOME	597	6	0.000116708	0.00902109
GO_cc	GO_CELL_CELL_CONTACT_ZONE	71	3	0.000117157	0.00902109
GO_cc	GO_MLL1_2_COMPLEX	28	2	0.000647178	0.0462733
GO_cc	GO_I_BAND	136	3	0.00079307	0.0496165
GO_cc	GO_SARCOLEMMA	136	3	0.00079307	0.0496165
GO_mf	GO_HISTONE_BINDING	188	5	4.66029e-06	0.00287771
GO_mf	GO_PROTEIN_METHYLTRANSFERASE_ACTIVITY	86	4	5.122e-06	0.00287771
GO_mf	GO_TRANSCRIPTION_COREGULATOR_ACTIVITY	554	7	6.3773e-06	0.00287771
GO_mf	GO_N_METHYLTRANSFERASE_ACTIVITY	93	4	6.99747e-06	0.00287771
GO_mf	GO_HISTONE_LYSINE_N_METHYLTRANSFERASE_ACTIVITY	44	3	2.78114e-05	0.00914994
GO_mf	GO_S_ADENOSYLMETHIONINE_DEPENDENT_METHYLTRANSFERASE_ACTIVITY	154	4	5.10742e-05	0.0110801
GO_mf	GO_TRANSCRIPTION_COACTIVATOR_ACTIVITY	315	5	5.60123e-05	0.0110801
GO_mf	GO_CHROMATIN_BINDING	529	6	5.9874e-05	0.0110801
GO_mf	GO_HISTONE_METHYLTRANSFERASE_ACTIVITY	57	3	6.07332e-05	0.0110801
GO_mf	GO_LYSINE_N_METHYLTRANSFERASE_ACTIVITY	59	3	6.73564e-05	0.0110801
GO_mf	GO_BETA_CATENIN_BINDING	82	3	0.000179755	0.0262578
GO_mf	GO_TRANSFERASE_ACTIVITY_TRANSFERRING_ONE_CARBON_GROUPS	219	4	0.000199146	0.0262578
GO_mf	GO_HISTONE_METHYLTRANSFERASE_ACTIVITY_H3_K4_SPECIFIC_	16	2	0.000207509	0.0262578

## Sheet: STable 7
Supplementary Table 7. Recurrent cross-disorder LoF DNMs that are not recurrent in developmental disorder alone
Gene	Chr	Start	End	Ref	Alt	Disorder	SampleID
SAMD11	1	879375	879375	C	T	DD	rumc_patient_1057
SAMD11	1	879375	879375	C	T	CHD	1-01111
TNFRSF25	1	6522052	6522052	A	G	DD	12520
TNFRSF25	1	6522052	6522052	A	G	CHD	1-01088
NFIA	1	61553905	61553905	C	T	DD	DDD13k.08600
NFIA	1	61553905	61553905	C	T	ASD	SSC08191
ASH1L	1	155448617	155448622	CTTTTT	C	DD	96728
ASH1L	1	155448617	155448622	CTTTTT	C	CHD	1-02749
CD1C	1	158262616	158262616	C	T	DD	DDD13k.08597
CD1C	1	158262616	158262616	C	T	CHD	1-02259
FBXO11	2	48035295	48035297	CAG	C	ASD	SSC09737
FBXO11	2	48035295	48035297	CAG	C	CH	KCHYD444-1
SPTBN1	2	54880897	54880899	CAG	C	DD	33593
SPTBN1	2	54880897	54880899	CAG	C	CHD	1-13022
BCL11A	2	60689253	60689253	A	AG	DD	29164
BCL11A	2	60689253	60689253	A	AG	ASD	SSC06946
SETD5	3	9486877	9486877	C	T	DD	10279
SETD5	3	9486877	9486877	C	T	CHD	1-10372
PHF7	3	52454424	52454425	GC	G	DD	3551
PHF7	3	52454424	52454425	GC	G	ASD	SSC04464
ADGRG7	3	100413829	100413829	C	CA	DD	38212
ADGRG7	3	100413829	100413829	C	CA	CH	CHYD100-1
MSL2	3	135871025	135871029	TCAGA	T	DD	118332
MSL2	3	135871025	135871029	TCAGA	T	ASD	12948.p1
SPRY1	4	124322748	124322748	T	C	DD	12138
SPRY1	4	124322748	124322748	T	C	CHD	1-06283
NAA15	4	140272756	140272760	CAAAG	C	DD	DDD13k.05085
NAA15	4	140272756	140272760	CAAAG	C	CHD	1-00455
NSD1	5	176673717	176673717	C	T	DD	22329
NSD1	5	176673717	176673717	C	T	CHD	1-12252
DOCK5	8	25257428	25257428	C	CT	DD	28858
DOCK5	8	25257428	25257428	C	CT	ASD	37435
KAT6A	8	41791712	41791713	CT	C	DD	18439
KAT6A	8	41791712	41791713	CT	C	CHD	1-04215
CHD7	8	61763105	61763105	C	T	DD	17912
CHD7	8	61763105	61763105	C	T	CHD	1-10974
HNRNPK	9	86586586	86586586	C	T	DD	5814
HNRNPK	9	86586586	86586586	C	T	CHD	1-08053
STXBP1	9	130428484	130428484	C	T	DD	DDD13k.02735
STXBP1	9	130428484	130428484	C	T	EP	ND33342
WAC	10	28906676	28906676	C	T	DD	70135
WAC	10	28906676	28906676	C	T	CHD	1-01394
KAT6B	10	76788475	76788475	G	GA	DD	DDD13k.04936
KAT6B	10	76788475	76788475	G	GA	CHD	1-07058
STARD10	11	72468902	72468902	G	A	DD	28858
STARD10	11	72468902	72468902	G	A	ASD	37435
GRIN2B	12	13768147	13768147	G	A	DD	58386
GRIN2B	12	13768147	13768147	G	A	ASD	05C44735
CHD2	15	93563244	93563244	C	T	DD	DDD13k.03442
CHD2	15	93563244	93563244	C	T	ASD	13614.p1
SRRM2	16	2813308	2813312	CAAAG	C	DD	93989
SRRM2	16	2813308	2813312	CAAAG	C	ASD	DEASD_0082_001
ASXL3	18	31322918	31322918	C	T	DD	25287
ASXL3	18	31322918	31322918	C	T	ASD	DEASD_0395_001
PRR12	19	50100860	50100861	AC	A	DD	108008
PRR12	19	50100860	50100861	AC	A	ASD	152952
ASXL1	20	31024758	31024758	C	T	DD	98438
ASXL1	20	31024758	31024758	C	T	CHD	1-04603
ZMYND8	20	45875071	45875071	C	CT	DD	DDD13k.00990
ZMYND8	20	45875071	45875071	C	CT	ASD	08C76266

## Sheet: STable 8
Supplementary Table 8. Estimated proportion of shared causal genes using mTADA
Trait1	Trait2	Variant class	πS1	πS2	π3	pval	qval	FDR<0.05
DD	ASD	LoF	0.00981456	0.0273473	0.00806872	0.00019998	0.0359964	*
DD	ASD	Dmis	0.0350481	0.0298042	0.0175357	0.00019998	0.0179982	*
DD	ASD	Tmis	0.0189369	0.0252266	0.00870972	0.00039996	0.00342823	*
DD	ASD	synonymous	0.00226233	0.00194931	0.0013351	0.00579942	0.0237249	*
DD	SCZ	LoF	0.00981456	0.0060778	0.00189361	0.00019998	0.0119988	*
DD	SCZ	Dmis	0.0350481	0.00708748	0.00601802	0.0237976	0.0348258	*
DD	SCZ	Tmis	0.0189369	0.00263332	0.00199377	0.0365963	0.0454299	*
DD	SCZ	synonymous	0.00226233	0.00226701	0.000620472	0.00479952	0.0210711	*
ASD	SCZ	LoF	0.0273473	0.0060778	0.00354648	0.00079992	0.00575942	*
ASD	SCZ	Dmis	0.0298042	0.00708748	0.00517188	0.0485951	0.0583142
ASD	SCZ	Tmis	0.0252266	0.00263332	0.00183598	0.0483952	0.058464
ASD	SCZ	synonymous	0.00194931	0.00226701	0.000584288	0.00379962	0.0189981	*
DD	CHD	LoF	0.00981456	0.00592556	0.00285554	0.00019998	0.0089991	*
DD	CHD	Dmis	0.0350481	0.0288496	0.00666885	0.00019998	0.00719928	*
DD	CHD	Tmis	0.0189369	0.00492777	0.00114966	0.0553945	0.0631076
DD	CHD	synonymous	0.00226233	0.0024582	0.00162634	0.00519948	0.0222835	*
ASD	CHD	LoF	0.0273473	0.00592556	0.00228579	0.00019998	0.0059994	*
ASD	CHD	Dmis	0.0298042	0.0288496	0.00374047	0.0853915	0.0888466
ASD	CHD	Tmis	0.0252266	0.00492777	0.00341349	0.049995	0.0584357
ASD	CHD	synonymous	0.00194931	0.0024582	0.00135179	0.0059994	0.0239976	*
SCZ	CHD	LoF	0.0060778	0.00592556	0.000465722	0.0339966	0.0430943	*
SCZ	CHD	Dmis	0.00708748	0.0288496	0.00191396	0.0705929	0.0770105
SCZ	CHD	Tmis	0.00263332	0.00492777	0.00080281	0.00939906	0.0272876	*
SCZ	CHD	synonymous	0.00226701	0.0024582	0.000720925	0.0039996	0.0189455	*
DD	ID	LoF	0.00981456	0.00901701	0.00803449	0.00019998	0.00514234	*
DD	ID	Dmis	0.0350481	0.0375847	0.0295116	0.00019998	0.00449955	*
DD	ID	Tmis	0.0189369	0.00239239	0.00236472	0.00019998	0.0039996	*
DD	ID	synonymous	0.00226233	0.00560954	0.0017387	0.00839916	0.0269973	*
ASD	ID	LoF	0.0273473	0.00901701	0.00875934	0.00019998	0.00359964	*
ASD	ID	Dmis	0.0298042	0.0375847	0.0148013	0.00019998	0.0032724	*
ASD	ID	Tmis	0.0252266	0.00239239	0.00171256	0.0331967	0.0429885	*
ASD	ID	synonymous	0.00194931	0.00560954	0.000581393	0.0139986	0.0289626	*
SCZ	ID	LoF	0.0060778	0.00901701	0.00190375	0.00379962	0.0184846	*
SCZ	ID	Dmis	0.00708748	0.0375847	0.00221959	0.0737926	0.0800161
SCZ	ID	Tmis	0.00263332	0.00239239	0.00175783	0.00239976	0.015427	*
SCZ	ID	synonymous	0.00226701	0.00560954	0.000662418	0.0127987	0.0277563	*
CHD	ID	LoF	0.00592556	0.00901701	0.00299521	0.00019998	0.0029997	*
CHD	ID	Dmis	0.0288496	0.0375847	0.00344262	0.164984	0.166837
CHD	ID	Tmis	0.00492777	0.00239239	0.000702449	0.009999	0.026863	*
CHD	ID	synonymous	0.0024582	0.00560954	0.00072339	0.009999	0.0264679	*
DD	TD	LoF	0.00981456	0.00422035	0.00150916	0.00739926	0.026115	*
DD	TD	Dmis	0.0350481	0.0142596	0.0039874	0.0781922	0.0837773
DD	TD	Tmis	0.0189369	0.00319517	0.00231972	0.0347965	0.0434957	*
DD	TD	synonymous	0.00226233	0.00598595	0.000679966	0.019998	0.0324292	*
ASD	TD	LoF	0.0273473	0.00422035	0.00356708	0.0171983	0.0306504	*
ASD	TD	Dmis	0.0298042	0.0142596	0.00419712	0.0631937	0.0710929
ASD	TD	Tmis	0.0252266	0.00319517	0.00224414	0.0487951	0.0581664
ASD	TD	synonymous	0.00194931	0.00598595	0.000572013	0.0113989	0.0281068	*
SCZ	TD	LoF	0.0060778	0.00422035	0.000871911	0.0217978	0.0338242	*
SCZ	TD	Dmis	0.00708748	0.0142596	0.0049558	0.0339966	0.0427929	*
SCZ	TD	Tmis	0.00263332	0.00319517	0.00178115	0.00679932	0.0254975	*
SCZ	TD	synonymous	0.00226701	0.00598595	0.000707633	0.00839916	0.0265237	*
CHD	TD	LoF	0.00592556	0.00422035	0.00295248	0.0039996	0.0184597	*
CHD	TD	Dmis	0.0288496	0.0142596	0.00402445	0.0643936	0.0719928
CHD	TD	Tmis	0.00492777	0.00319517	0.000947696	0.010199	0.0262259	*
CHD	TD	synonymous	0.0024582	0.00598595	0.00173321	0.00719928	0.0264463	*
ID	TD	LoF	0.00901701	0.00422035	0.00128399	0.0119988	0.0280491	*
ID	TD	Dmis	0.0375847	0.0142596	0.0104861	0.0529947	0.0611477
ID	TD	Tmis	0.00239239	0.00319517	0.000692597	0.00959904	0.0274258	*
ID	TD	synonymous	0.00560954	0.00598595	0.00164615	0.0119988	0.0276895	*
DD	EP	LoF	0.00981456	0.00293571	0.00166009	0.00019998	0.00276895	*
DD	EP	Dmis	0.0350481	0.00483794	0.0046611	0.00019998	0.00257117	*
DD	EP	Tmis	0.0189369	0.0070634	0.00608727	0.009999	0.0260843	*
DD	EP	synonymous	0.00226233	0.00501155	0.00157634	0.00819918	0.0273306	*
ASD	EP	LoF	0.0273473	0.00293571	0.000403783	0.128587	0.13151
ASD	EP	Dmis	0.0298042	0.00483794	0.0045678	0.00019998	0.00239976	*
ASD	EP	Tmis	0.0252266	0.0070634	0.0049885	0.0491951	0.0578766
ASD	EP	synonymous	0.00194931	0.00501155	0.00134567	0.0115988	0.0282134	*
SCZ	EP	LoF	0.0060778	0.00293571	0.000721793	0.0123988	0.0282503	*
SCZ	EP	Dmis	0.00708748	0.00483794	0.00139965	0.0143986	0.0281711	*
SCZ	EP	Tmis	0.00263332	0.0070634	0.00181431	0.0153985	0.0288721	*
SCZ	EP	synonymous	0.00226701	0.00501155	0.000686005	0.00879912	0.0268448	*
CHD	EP	LoF	0.00592556	0.00293571	0.000383292	0.0267973	0.0365418	*
CHD	EP	Dmis	0.0288496	0.00483794	0.00038345	0.189781	0.190841
CHD	EP	Tmis	0.00492777	0.0070634	0.00154384	0.0139986	0.0286335	*
CHD	EP	synonymous	0.0024582	0.00501155	0.00169568	0.0059994	0.0234759	*
ID	EP	LoF	0.00901701	0.00293571	0.00041718	0.0391961	0.0483239	*
ID	EP	Dmis	0.0375847	0.00483794	0.00413341	0.00059994	0.00469518	*
ID	EP	Tmis	0.00239239	0.0070634	0.00168592	0.0141986	0.0283972	*
ID	EP	synonymous	0.00560954	0.00501155	0.00141728	0.0123988	0.0278972	*
TD	EP	LoF	0.00422035	0.00293571	0.000857137	0.00839916	0.0260664	*
TD	EP	Dmis	0.0142596	0.00483794	0.00131366	0.0333967	0.0429386	*
TD	EP	Tmis	0.00319517	0.0070634	0.000962856	0.0191981	0.031415	*
TD	EP	synonymous	0.00598595	0.00501155	0.0035405	0.0115988	0.0278372	*
DD	CP	LoF	0.00981456	0.00566799	0.00243616	0.00039996	0.0032724	*
DD	CP	Dmis	0.0350481	0.00273294	0.00194305	0.00019998	0.00224978	*
DD	CP	Tmis	0.0189369	0.00752999	0.00637462	0.00639936	0.0245082	*
DD	CP	synonymous	0.00226233	0.0112703	0.000674234	0.0211979	0.0337665	*
ASD	CP	LoF	0.0273473	0.00566799	0.00489636	0.00059994	0.00449955	*
ASD	CP	Dmis	0.0298042	0.00273294	0.00186874	0.0427957	0.0524029
ASD	CP	Tmis	0.0252266	0.00752999	0.00565235	0.0333967	0.042634	*
ASD	CP	synonymous	0.00194931	0.0112703	0.00135819	0.0235976	0.0348162	*
SCZ	CP	LoF	0.0060778	0.00566799	0.00126713	0.0183982	0.0315397	*
SCZ	CP	Dmis	0.00708748	0.00273294	0.000797231	0.0151985	0.0287971	*
SCZ	CP	Tmis	0.00263332	0.00752999	0.000815793	0.0167983	0.0305424	*
SCZ	CP	synonymous	0.00226701	0.0112703	0.00154466	0.0183982	0.0312422	*
CHD	CP	LoF	0.00592556	0.00566799	0.00261651	0.0009999	0.00692238	*
CHD	CP	Dmis	0.0288496	0.00273294	0.000726721	0.0657934	0.0731038
CHD	CP	Tmis	0.00492777	0.00752999	0.00143268	0.0177982	0.0308046	*
CHD	CP	synonymous	0.0024582	0.0112703	0.00172139	0.0215978	0.0338053	*
ID	CP	LoF	0.00901701	0.00566799	0.00486473	0.00019998	0.00211744	*
ID	CP	Dmis	0.0375847	0.00273294	0.00238788	0.00259974	0.0161363	*
ID	CP	Tmis	0.00239239	0.00752999	0.00168605	0.0169983	0.0305969	*
ID	CP	synonymous	0.00560954	0.0112703	0.00167806	0.0259974	0.0368467	*
TD	CP	LoF	0.00422035	0.00566799	0.00124206	0.0109989	0.0274973	*
TD	CP	Dmis	0.0142596	0.00273294	0.000837535	0.0271973	0.0365337	*
TD	CP	Tmis	0.00319517	0.00752999	0.00223547	0.0159984	0.0296878	*
TD	CP	synonymous	0.00598595	0.0112703	0.0017319	0.0213979	0.0337861	*
EP	CP	LoF	0.00293571	0.00566799	0.000829248	0.0123988	0.0275528	*
EP	CP	Dmis	0.00483794	0.00273294	0.00180051	0.0029997	0.0179982	*
EP	CP	Tmis	0.0070634	0.00752999	0.00208022	0.0147985	0.0283376	*
EP	CP	synonymous	0.00501155	0.0112703	0.00151176	0.0175982	0.0307542	*
DD	CH	LoF	0.00981456	0.00993616	0.00216774	0.00019998	0.0019998	*
DD	CH	Dmis	0.0350481	0.0382332	0.00596102	0.0873913	0.0904048
DD	CH	Tmis	0.0189369	0.00135885	0.000577068	0.00019998	0.00189455	*
DD	CH	synonymous	0.00226233	0.0131567	0.000699964	0.0271973	0.036263	*
ASD	CH	LoF	0.0273473	0.00993616	0.00502892	0.00019998	0.00179982	*
ASD	CH	Dmis	0.0298042	0.0382332	0.00913637	0.0489951	0.0580205
ASD	CH	Tmis	0.0252266	0.00135885	0.000510032	0.0269973	0.0365377	*
ASD	CH	synonymous	0.00194931	0.0131567	0.00136809	0.0253975	0.0362821	*
SCZ	CH	LoF	0.0060778	0.00993616	0.000661007	0.0691931	0.0759436
SCZ	CH	Dmis	0.00708748	0.0382332	0.00486777	0.0671933	0.0742012
SCZ	CH	Tmis	0.00263332	0.00135885	0.000427651	0.00439956	0.019798	*
SCZ	CH	synonymous	0.00226701	0.0131567	0.000700468	0.0259974	0.0365588	*
CHD	CH	LoF	0.00592556	0.00993616	0.000949577	0.00359964	0.0190569	*
CHD	CH	Dmis	0.0288496	0.0382332	0.00436854	0.135186	0.137478
CHD	CH	Tmis	0.00492777	0.00135885	0.000423917	0.00819918	0.0268337	*
CHD	CH	synonymous	0.0024582	0.0131567	0.000748859	0.0259974	0.0362754	*
ID	CH	LoF	0.00901701	0.00993616	0.00248164	0.00339966	0.0191231	*
ID	CH	Dmis	0.0375847	0.0382332	0.00353235	0.266173	0.266173
ID	CH	Tmis	0.00239239	0.00135885	0.000186957	0.0139986	0.0283118	*
ID	CH	synonymous	0.00560954	0.0131567	0.00390293	0.0243976	0.0354158	*
TD	CH	LoF	0.00422035	0.00993616	0.00112974	0.0231977	0.0350889	*
TD	CH	Dmis	0.0142596	0.0382332	0.00426564	0.0825917	0.0874501
TD	CH	Tmis	0.00319517	0.00135885	0.000413688	0.00719928	0.0259174	*
TD	CH	synonymous	0.00598595	0.0131567	0.0018531	0.0217978	0.0335351	*
EP	CH	LoF	0.00293571	0.00993616	0.000748337	0.0293971	0.0389079	*
EP	CH	Dmis	0.00483794	0.0382332	0.00337541	0.0771923	0.0832013
EP	CH	Tmis	0.0070634	0.00135885	0.000949386	0.00979902	0.0271357	*
EP	CH	synonymous	0.00501155	0.0131567	0.00145522	0.0293971	0.0386239	*
CP	CH	LoF	0.00566799	0.00993616	0.001339	0.0259974	0.0359964	*
CP	CH	Dmis	0.00273294	0.0382332	0.000749078	0.0847915	0.0887353
CP	CH	Tmis	0.00752999	0.00135885	0.00040302	0.0137986	0.0288808	*
CP	CH	synonymous	0.0112703	0.0131567	0.00342839	0.0233977	0.0350965	*
DD	Ctrl	LoF	0.00981456	0.00572217	0.00174869	0.019998	0.0321396	*
DD	Ctrl	Dmis	0.0350481	0.00792158	0.00218495	0.0821918	0.0875415
DD	Ctrl	Tmis	0.0189369	0.00420203	0.00317001	0.0245975	0.0354205	*
DD	Ctrl	synonymous	0.00226233	0.00119471	0.000340104	0.00319968	0.0185788	*
ASD	Ctrl	LoF	0.0273473	0.00572217	0.0040458	0.0433957	0.0527785
ASD	Ctrl	Dmis	0.0298042	0.00792158	0.00562947	0.0511949	0.0594521
ASD	Ctrl	Tmis	0.0252266	0.00420203	0.00125818	0.0543946	0.0623632
ASD	Ctrl	synonymous	0.00194931	0.00119471	0.000849084	0.00539946	0.0226024	*
SCZ	Ctrl	LoF	0.0060778	0.00572217	0.00404369	0.00979902	0.0267246	*
SCZ	Ctrl	Dmis	0.00708748	0.00792158	0.0049112	0.0187981	0.0310428	*
SCZ	Ctrl	Tmis	0.00263332	0.00420203	0.00186892	0.00919908	0.0271448	*
SCZ	Ctrl	synonymous	0.00226701	0.00119471	0.000393817	0.00339966	0.0185436	*
CHD	Ctrl	LoF	0.00592556	0.00572217	0.00489389	0.0019998	0.013332	*
CHD	Ctrl	Dmis	0.0288496	0.00792158	0.00237519	0.0573943	0.0649746
CHD	Ctrl	Tmis	0.00492777	0.00420203	0.0012915	0.0145985	0.0282552	*
CHD	Ctrl	synonymous	0.0024582	0.00119471	0.000384255	0.00359964	0.0185124	*
ID	Ctrl	LoF	0.00901701	0.00572217	0.00152586	0.0261974	0.0359964	*
ID	Ctrl	Dmis	0.0375847	0.00792158	0.00212505	0.0937906	0.0964704
ID	Ctrl	Tmis	0.00239239	0.00420203	0.000696448	0.00759924	0.0263051	*
ID	Ctrl	synonymous	0.00560954	0.00119471	0.000823264	0.00959904	0.0269973	*
TD	Ctrl	LoF	0.00422035	0.00572217	0.00298425	0.00879912	0.0263974	*
TD	Ctrl	Dmis	0.0142596	0.00792158	0.00228063	0.0293971	0.038344	*
TD	Ctrl	Tmis	0.00319517	0.00420203	0.00222883	0.00759924	0.0258087	*
TD	Ctrl	synonymous	0.00598595	0.00119471	0.000361032	0.0127987	0.0274258	*
EP	Ctrl	LoF	0.00293571	0.00572217	0.0020368	0.0125987	0.0276558	*
EP	Ctrl	Dmis	0.00483794	0.00792158	0.00116018	0.0225977	0.0344711	*
EP	Ctrl	Tmis	0.0070634	0.00420203	0.00292238	0.0141986	0.0280851	*
EP	Ctrl	synonymous	0.00501155	0.00119471	0.000352412	0.0129987	0.0275267	*
CP	Ctrl	LoF	0.00566799	0.00572217	0.00172363	0.0115988	0.0274709	*
CP	Ctrl	Dmis	0.00273294	0.00792158	0.000782125	0.0183982	0.0309502	*
CP	Ctrl	Tmis	0.00752999	0.00420203	0.00141679	0.0163984	0.0301194	*
CP	Ctrl	synonymous	0.0112703	0.00119471	0.000836159	0.0183982	0.0306636	*
CH	Ctrl	LoF	0.00993616	0.00572217	0.00173324	0.0171983	0.0303499	*
CH	Ctrl	Dmis	0.0382332	0.00792158	0.00230879	0.0831917	0.0875702
CH	Ctrl	Tmis	0.00135885	0.00420203	0.000376531	0.010399	0.0263636	*
CH	Ctrl	synonymous	0.0131567	0.00119471	0.000351273	0.0233977	0.0348064	*
The column of πS1 and πS2 represent estimated proportion of causal genes for two traits respectively using extTADA. The column of π3, pval, and qval represent the estimated proportion of shared causal genes, its corresponding p value, and q value for each trait pair respectively using mTADA.

## Sheet: STable 9
Supplementary Table 9. Gene sets used in the partitioned correlation analysis
High-pLI genes	Low-pLI genes	HBE genes	LBE genes	HHE genes	LHE genes	CHD-related pathway genes
MED13	SP140	PTPRD	ANXA1	HBA2	SCML4	SMARCE1
NIPBL	ENPP1	NRXN1	GLIPR2	HBA1	ACOT4	SPTY2D1
SMC3	IFNL2	ROBO2	BMP3	IGF2	HIPK4	ERCC6
CNOT1	LRP10	MAP1B	ADAMTSL2	MYH7	ATP1A3	BICRA
RLF	AGT	TUBA1A	AEBP1	ACTC1	HIST2H3A	SUPT16H
PCF11	COG1	NKAIN2	SYNGR2	TNNT2	CALB2	SS18L1
FNDC3B	CLEC1B	DLG2	NDE1	MYH6	CPM	SS18
RSF1	ZFAND1	ANK2	AK1	MYL2	STOX1	RBBP4
NCKAP1	STK32B	MAP2	POMZP3	MYL7	PSORS1C2	BCL11B
KDM2A	MLH3	CELF2	SIGIRR	HBB	PTPRC	BCL11A
BRD4	QRSL1	GPM6A	ANKRD29	HBD	GLT8D2	BICRAL
HELZ	IMPACT	NRG3	PLCD1	MYL4	METTL24	SMARCD2
FBN1	DNAJC18	AUTS2	ZDHHC24	EEF1A1	RIC3	SMARCD1
XPO1	DCDC1	CADM2	SLC22A3	NPPA	F2RL3	MDM2
PRR12	TMEM234	RBFOX1	TMEM186	MYL9	KIF5A	SMARCD3
SYNGAP1	CGREF1	SATB2	NOSTRIN	RPLP1	SPHK1	SMARCC2
PRKDC	MRPS11	LRRC7	ZSCAN22	TPM1	PI15	SMARCA4
HDAC4	PLEKHG3	SYT1	DSP	ACTB	C16orf45	SMARCB1
SMG1	PLCXD2	MEF2C	TGM2	TNNC1	CST9L	SMARCA5
ZC3H4	BGLAP	CSMD1	ROBO3	FTL	INSL6	SMARCA2
COL5A1	PCDHGA3	DLGAP1	FICD	WDR89	KIRREL2	SMARCC1
SMARCA4	PLGRKT	PCDH9	DOCK2	ATP2A2	TMEM179	SMARCAD1
TNPO1	TTC30B	LSAMP	CENPL	TNNI1	AFP	INO80B
AGO1	KCNQ1	ARPP21	ELK3	SLC25A4	ST6GALNAC2	CENPP
ARHGAP35	PMPCB	STMN2	S1PR3	ATP5B	ANO5	ACTR6
LRP1	ACAD9	NLGN1	HHIP	IGF2R	ITGA4	MIS18A
TOP1	MARC1	TCF4	COL7A1	HSP90AB1	CCL24	HJURP
TRIP12	TYK2	DAB1	NOC4L	MEST	TMEM240	BAZ1A
KMT2E	SORD	NELL2	VASP	TUBB	GPAT2	BAHD1
UBTF	KLHDC1	LRP1B	TRAPPC1	MYL3	LCK	NAA40
KDM3B	PROCA1	NBEA	TMEM160	ALDOA	KBTBD13	ITGB3BP
TRRAP	ESR2	CTNND2	DBF4B	CFL1	PPP1R36	MORC2
GRIN2B	ZPLD1	PDE4D	TGDS	PAM	HIST1H1D	NASP
USP7	OXNAD1	SPTBN1	ZNF691	ATP5A1	PAPOLB	ANP32E
ATP1A3	C9orf135	DPYSL3	FILIP1L	MYBPC3	GRIK2	BAZ1B
ASH1L	CCDC24	ANK3	ZNF688	GRB10	SIGIRR	SETDB2
ANKRD17	PDSS2	RALYL	CYP1B1	IGFBP5	HIST4H4	MBD2
NPEPPS	PHF11	FAM155A	MND1	ATP5G3	HIST1H4A	PBRM1
CHERP	YIPF2	MACF1	SNAPC1	SPARC	RSPO2	POLE3
MED13L	TFEC	CHL1	DXO	HNRNPA2B1	ERMAP	H3F3A
RPRD2	MUSK	CTNNA2	CD8A	EEF2	C14orf28	HELLS
KMT2A	FAM162B	CALM1	IRF3	TNNI3	CTNNA2	PHF2
CREBBP	SLC3A2	GRIN2B	SEMA3G	NEDD4	ABHD3	INO80E
SF3B1	ZNF671	DPP10	BCDIN3D	FN1	KIF27	INO80C
EIF3B	UBE3B	DYNC1H1	TUBB6	ACTN2	CBLN3	ACTL6B
PPFIA1	FKBP7	ANKS1B	SLC26A6	ANKRD1	HIST1H3D	ACTL6A
ZSWIM6	ZNF502	NRXN3	DUSP23	RPL8	ADRB3	ZNHIT1
PRPF3	PNKD	SPTAN1	SHMT1	YWHAE	AK5	CENPV
KAT6A	C9orf92	ERBB4	THEM4	LBH	RSG1	KDM4B
KMT2B	TRMT61B	LRRTM4	CENPH	HSPB7	SEC14L2	MBD3
SIN3A	NMD3	CNTNAP2	B3GNT4	RPS20	CYB561	CECR2
CHD2	TF	DPYSL2	EPHX4	HBE1	UPK1A	PADI4
ARID1A	XKR8	MAGI2	CX3CL1	IDH2	LZTS1	PPHLN1
SCN1A	C11orf42	OPCML	VEPH1	ACTA2	NXNL2	BAZ2A
TJP1	KRT75	MYT1L	DNAJC30	CSRP3	COL4A3	BEND3
SPEN	GUSB	FAT3	NSUN7	SLC8A1	TCHH	NPM2
WDFY3	NAGS	EEF1A1	VCAM1	TUBA1B	SLC1A2	FAM172A
EHMT1	SEMA3D	NCAM1	ADAMTS8	PKM	DCDC2	NRDE2
JMJD1C	OR2D2	SLC8A1	HIST1H3I	TPI1	POU2F2	TNP2
MAP3K12	ZNF280A	TUBB	IL17RA	MYL12A	TNFAIP8L2	ZNFX1
GGNBP2	PECR	DST	EHD4	ENO1	TEX26	ARID1A
TLE3	WBP4	CCSER1	NANP	EIF1	KCNAB1	KDM4C
CHD6	ZNF461	DCLK1	RAD54B	SERPINH1	TRIM9	MPHOSPH8
UBR5	OR4M2	FAM19A1	RAMP2	RPS3	APOBEC1	RRP8
EIF4G1	SIRPD	FRMD4A	CSRNP1	VIM	SORCS1	VPS72
NBEA	FAM151B	PBX1	VGF	GPX3	ZNF786	CHD1
SMARCA5	HOOK1	EEF2	TTC38	UBC	HEMGN	NPM3
TSC2	MTMR6	ROBO1	MYOM1	UQCRH	REP15	TTF1
SUPT5H	C8orf31	SOX5	TOE1	CKM	PRKCG	SETDB1
GREB1L	LIPT1	TMEM108	APLNR	RPS29	CLEC2A	ACTR5
PTCH1	BCAT1	HSPA8	DYSF	ATP1A1	CLEC2D	ACTR8
CHD7	C7orf72	GRIA2	GPR68	PFN1	SNX20	TADA2B
RAD54L2	ACTRT3	PPFIA2	CCDC61	NDUFA12	ITGB2	H3F3B
CNOT3	DDC	ENC1	PAPSS2	COL4A1	RAB38	TNP1
AHDC1	ZNF684	NTM	PDCL3	GNAS	MSX2	SUV39H2
U2SURP	DFNB59	SSBP2	MAP3K8	DSTN	SHANK2	EZH1
RBM25	HOXB13	ZEB2	FIZ1	HSPG2	FBLN7	DNMT3A
GIGYF2	IL20RB	LRRC4C	RPP40	CRIP2	ANKRD13D	KDM4D
MBTD1	ZSCAN31	KIF5C	CLSPN	UBA52	MATK	DNMT3B
DCAF5	GLYAT	NEGR1	GPR61	TUBA1A	ISG15	TET1
RABGAP1	SH2D3A	TRIO	NOTCH4	EIF4G2	EPHX4	PAX7
KHSRP	FASTKD5	FGF12	NUDT1	ITGB1	GXYLT2	SATB1
TM9SF2	CHRNA6	TENM2	TM4SF1	HCFC1R1	SNPH	CHD3
MATR3	NMRK1	TTC3	LIN28B	NDUFA4	TRPM3	ARID1B
PHF21A	HAUS1	KIDINS220	LRRC39	ATP5E	ZNF416	RSF1
NAV1	SERPINB1	HIVEP2	RGS22	RPL4	ANXA8L1	TADA2A
HIVEP2	ABHD15	AFF3	TMED1	PTMA	ANXA8	SCMH1
RBBP6	CFI	TRIM2	LIX1	UQCR11	LRRTM2	PIWIL1
GTPBP4	PTGR1	MACROD2	CMPK2	VDAC1	CCDC180	AICDA
MYBL1	NOL7	KALRN	BVES	FUS	MPZL3	ATF7IP
DYNC1H1	PRKAA2	CLASP2	XRCC3	TUBA1C	FAM228A	RUVBL2
SBNO1	NR1I3	KHDRBS2	CCDC80	LDB3	TRIM71	CHD5
PRKCB	OR4C46	RTN4	PTRH1	SCD	PPBP	GATAD1
INO80	SPATA19	GRIK2	HIST1H2AK	HNRNPA1	SRSF12	HMGA1
TAF4	TMEM150B	MLLT3	EMC9	NDUFA3	GPR135	SMCHD1
TRIM28	SLC35F5	PLXNA4	PRKD2	COX6A2	GLIS3	CHD1L
CHD8	CPNE9	AKT3	LPCAT2	RPS9	ZSCAN30	SIRT6
RBM33	C1RL	TENM4	AGA	FTH1	GLS2	TRIM28
SNRNP200	SLC2A2	GRM7	NPAS1	NEXN	UBXN10	KDM6B
XPO6	IL36RN	RBFOX2	DCPS	MYOM1	DKK2	KDM5A
SMARCAD1	HEMK1	ATRNL1	GSTZ1	SLC25A3	CES1	JARID2
MACF1	CST1	RUNX1T1	GAS1	SRRM2	QPRT	UBTF
WAC	MYOT	CNTN1	VWCE	FSTL1	RIMBP2	MYSM1
ATP2B1	UCHL3	IQCJ-SCHIP1	SEMA3D	UQCRQ	CPA5	APOBEC1
EIF4G2	PSMF1	PSD3	ANKRD18A	ATP5J	AQP3	DNMT1
ZNF462	PPHLN1	GRIA1	HDHD3	SPTBN1	PVALB	PSME4
WDR26	CCDC88C	KCNIP4	TRPM2	FLNC	GRB7	KLF1
TRIM33	KIAA1328	KIF1B	SLN	MAP7	EGR2	SYCP3
STXBP1	DHRS7C	CSMD3	EHBP1L1	HSPA8	PCDH15	PABPC1L
TOPBP1	RARS	ACTG1	GHDC	NACA2	EPS8L1	BPTF
NF2	SULT1B1	SEMA6D	MEMO1	COX4I1	ZNF791	DAXX
TET3	C1QTNF9B	MYCBP2	ENPP2	GYG1	PLA2G5	MPND
SUPT6H	HHAT	FLRT2	RERGL	RPS16	GPR45	BRD4
MYT1L	PDSS1	XKR4	TMEM107	HNRNPU	ATP6V0A4	KDM4A
SPTBN1	GDAP1	CEP170	ZFP36L2	CDKN1C	BCL3	RNF8
MYH9	MLC1	TUBB2B	DNPH1	UQCR10	HPN	DMAP1
COPB2	PSMD5	CACNA2D1	LEKR1	EEF1B2	CPLX1	POU5F1
RNF17	HIST1H2BF	NFIB	F13A1	COX5A	CORT	KAT2B
ANK3	GPR151	MATR3	MYO5C	ATP5D	PGAP1	PIH1D1
MGA	BFSP2	ERC2	RXRG	DES	GALNT12	INO80
ANKRD52	UQCC1	APP	CCDC39	GAPDH	WNT4	SATB2
USP34	TRIM62	PHACTR1	HMG20B	LDHA	CD274	RUVBL1
PREX1	POLI	TTC28	AEN	CD81	COL17A1	TPR
CYFIP2	PGAP1	FGF14	TSNAXIP1	COL4A2	CKMT1B	SMYD1
ZNF407	DNPEP	RTN1	FABP5	RRBP1	CKMT1A	PTMA
KPNB1	GTF2IRD2	PPP2R2B	UBXN8	COX7A2	ZPBP	RERE
CUL2	ANTXRL	STMN1	SLC31A2	NFIB	HYDIN	HCFC2
DAAM2	ITK	YWHAZ	HINT2	NDUFV3	TM4SF4	MEN1
EFTUD2	CHEK1	LIMCH1	SLC29A2	PGAM2	KRT14	NUDT5
YTHDC1	FAM83D	MDGA2	AMT	CS	C5AR1	BSX
NCBP1	AMDHD1	KCNQ5	KIAA1755	HMGB1	FGD2	BRDT
TCF20	GUCY1A3	EIF4G2	GALNT3	LAMC1	PCSK4	HDAC1
UBR4	UTP6	PCLO	CRYZ	CALR	PCLO	TOP1
STAT3	PAEP	PTPRK	CCNJL	COL3A1	ARHGDIG	CHD8
NSD1	CCDC51	KCNQ3	ZNF788	RPS28	PARP14	CHD7
SRCAP	MED23	PRKACB	KCNJ10	PPP1CA	SLC6A17	FSHR
SCAF8	TMEM107	TANC2	ADAMTS5	RPS5	CARD9	NR3C1
ARID2	POC1B	SLC44A5	LYPD5	BTBD9	CCDC106	HMGA2
COL5A2	CASP4	NAV3	NR1H3	NDUFV2	KCNE2	FOXA1
PHC3	DUXA	DSCAM	MAPKAPK3	LGALS1	TSSK4	SIRT1
FBXO11	STXBP2	NCAM2	MIF4GD	PLN	HCAR1	ERG
NOTCH1	GTF2H3	ZNF91	LMCD1	RPL13A	CES2	HNF1A
COL3A1	IZUMO1	AKAP6	TAGLN	COX6B1	DNAJC22	KLF6
ILF3	TNFRSF10D	KCNH7	PRRT4	ACTG1	RPL3L	ZBTB7A
PLEKHA5	UPK2	NTRK3	ID3	NISCH	GUCY1A2	DR1
ZNF521	TMEM202	NRG1	IFI6	EIF4G1	CD83	KDM5B
CTNND2	SCARA3	HERC1	GCAT	PALM2-AKAP2	PRR16	NFATC3
ACTN4	GGT6	ACTB	TMEM216	AKAP2	DPYSL4	HDAC4
UPF2	FAM153B	PTPRZ1	CTSZ	RBM24	SLC29A4	TP63
PAXIP1	TCP10L2	NTRK2	IRAK4	RPLP0	TRIM36	FOXC2
BPTF	DCUN1D2	CADM1	AP5S1	COX8A	SGK494	CTNNB1
EP300	IFI30	SETBP1	TP53	HBZ	WDFY4	DICER1
AP2A1	HGD	DNM3	SRGN	SON	GRIN2D	CDKN2A
SPTAN1	LTA4H	YWHAG	DGAT2	HNRNPK	HNMT	ELF3
RPTOR	SEC14L2	CRMP1	SLC38A11	GPI	GPR160	HOXA3
CAND1	SMCO2	EPHA5	PARPBP	TPT1	ATP2B2	FOXC1
CACNA1C	ABCB10	CSRNP3	ABCA6	MICAL2	CHRND	MYB
ARID1B	CHADL	KIAA1109	DDX60	PRRC2A	ARSJ	TP53
PSMD2	C11orf54	ADCY1	PYGL	RPL22	RGS8	ZBTB1
KMT2D	ETV4	GAPDH	TRAPPC5	CCND2	C2CD4A	MITF
UBAP2L	KIF21A	ATP9A	ITGA5	CHD4	C2CD4B	NPM1
RRM1	ATP6V1C2	GRM5	RPS6KA1	NDUFV1	FAAH	SOX9
RFX3	PCDHGA5	NAV2	CCDC134	RPL32	TTR	GATA4
BIRC6	FAM160B2	KAZN	CD9	SORBS2	CLEC11A	ATG5
CLTC	CEP57L1	TMOD2	ADAMTS12	CANX	IKZF1	NR1H4
COPA	CRELD2	VCAN	PDGFB	ANP32D	HES7	EPAS1
COL1A1	PCDHGB4	ENOX1	CCPG1	ANP32A	CCDC36	GATA3
DHX15	BCAS2	GRID2	ZNF665	MDH2	SP110	RBPJ
DHX9	KANK3	LDB2	PIK3C2G	HSPB1	ESR1	LIF
MAP2	MYL2	GUCY1A2	HIST1H2BM	DDX17	EVI2A	HAND2
AGO2	B3GAT3	BACH2	ARHGDIB	SERBP1	PROZ	PPP3CA
ANK2	PIWIL2	UNC5D	PDPN	DDB1	HSD11B1	TBX1
RALGAPB	EEFSEC	MED13L	HSCB	PALLD	CNTF	STAT5A
IPO7	FUCA1	RPL4	UBALD1	EIF3A	AMH	NR1H3
SCAF4	HSD3B7	CACNA1E	BLOC1S4	CTNNB1	TRIM67	MYC
ZCCHC11	ZNF404	NEDD4L	ZNF98	SYNPO2L	PKIB	NR1H2
ZCCHC6	IL5RA	RIMS1	SENP3	COX6A1	AMER2	PRKCA
ANKRD11	OR52R1	PLCB1	EMP1	BSG	HOXA3	PAK1
ZEB2	TNK1	PTPRO	TIMP3	DDX5	EFCAB1	MEF2C
AP2A2	CFHR1	GNAQ	ZNF408	FAM221B	NMNAT2	VEGFA
NAA25	CALML6	PTPRN2	SNAI2	AES	SAMSN1	AHR
BAZ1B	C1orf189	NPAS3	IL18BP	PLAGL1	B3GNT4	APP
SETBP1	HFE	NREP	SLC7A2	CCND3	TDRD9	HIF1A
ARID5B	C2orf54	TNIK	SOWAHB	HMGN2	GNMT	TGFB1
TPR	COL15A1	DOCK4	SCO2	HMGN4	P2RX1	EGFR
TRPS1	ENKD1	XPR1	CCDC141	NDUFA13	DMKN	RTTN
MTA1	CAPN5	MYO5A	PTGER3	RPLP2	KCNT2	TMEM237
EIF4G3	SCYL1	NKAIN3	TTC30B	CSDE1	REL	BBS1
NTRK2	LGR5	EPHA3	CCDC9	COL1A1	C10orf90	RAB29
ANKHD1	CDK14	FNBP1L	PTX3	OAZ1	GABRA1	SPATA18
ANKHD1-EIF4EBP3	TMEM40	NFIA	MAP2K3	NCL	PPIL6	C4BPA
NRXN3	ITFG2	CNTN4	NCAPG	HSP90B1	TBXAS1	TCTN1
PTPRD	SEC14L6	ARHGAP21	TACR3	SNRNP70	NAP1L5	SLC9B2
RBM26	NEU3	CLASP1	ENKD1	HSPA5	FZD10	USH1G
RIF1	SFXN3	ARHGEF12	MST1	DSP	BEST3	SV2B
PHIP	COQ3	MAP4K4	KCNJ4	EIF4H	MAP3K7CL	CEP164
USP8	ISCA2	SYNE1	EFNA3	TMOD1	DNAI1	SHANK3
HNRNPU	TTC26	HSP90AB1	CCDC117	HNRNPAB	SCN2A	QRICH2
TLK2	FAM3B	MMP16	PYROXD2	ACO2	ASB14	KCNJ11
TRERF1	IFNL3	DPP6	CCNA2	SRSF2	TNFAIP6	SSX2IP
DHX30	DNAI1	CADPS	BRIP1	ENO3	ITGAE	GPX5
MYCBP2	FGD6	TOP2B	DSN1	ZFP36L1	SACS	ODF2L
FUBP1	RPF1	TUBA1B	CCDC175	CALM1	NACAD	ATP6V1E2
TRIM24	CSTL1	CDH2	S100A6	HNRNPM	TRIM43	TTBK2
ZC3H7A	SH2D7	NRCAM	CXCL14	MDH1	PCDHB11	FAM183A
NOTCH2	ANGPTL6	DDX17	HVCN1	ANXA6	PCDHB12	CEP290
SMARCC1	AGBL5	KIF1A	EMC6	HYPK	STK32C	CD52
RAI1	KRT8	FMNL2	SAC3D1	SRL	LMO3	IQCG
CSE1L	STARD13	PPP3CA	PARP10	OGDH	DDX4	ATP1B1
PIK3CA	SIRT2	LMO3	PAOX	MYH10	PROKR1	ATP1B3
KIF5C	ST3GAL6	CERS6	CDCA7	TNNT1	TMC3	ARMC4
REV3L	BPIFB1	SCN2A	CYP27A1	RPS15	CSRNP3	JADE1
AGPS	TTC24	44256	CBS	SRSF1	ISM1	LY6K
ADAM10	DLAT	TMEM178B	ENOSF1	MORF4L1	RIMS3	OAZ3
MED1	SUMF1	MSRA	MAP1LC3B2	NDUFB8	BST1	ATP1A1
SMARCC2	MDC1	JMJD1C	HGFAC	NDUFB8	RFX8	TEKT4
MYRF	TMEM95	TNPO1	EYA2	LMO7	APOA1	CFAP65
DOT1L	ABHD4	CCDC88A	TMCO6	HNRNPA3	UNC13D	GLIPR1L1
CHAF1A	NRIP3	MAPK8	PCP4	CTNNA1	TNFRSF4	DLD
PSMD1	TUBGCP2	PRICKLE2	ASS1	COL1A2	BNC2	DNAH12
SRRM2	MMP17	DCC	DNAJC28	PRKAR1A	SRGN	DNAH8
TSC1	UPK1B	DOCK3	PGM5	HADHA	RAMP3	IFT122
SON	ATG10	DOCK9	DCDC2	SDHA	SLC16A4	HEXB
STAG1	MDN1	ANKRD36	DHODH	LRRC58	LTC4S	SPACA3
VCPIP1	CHODL	ADD2	FAM110C	LAMB1	FBXL21	TSGA10
MAU2	AP1M2	HDAC9	VAMP1	CCT2	SYT9	RAB8A
POGZ	RUFY1	ZBTB18	PPP1R3E	CTNND1	ALK	TTC29
SF3A3	DDX55	ASXL3	GINS3	ATP5F1	RXRG	SPATC1L
FXR1	C12orf29	SERINC1	NAIF1	GJA1	RTP4	CEP78
CDC42BPB	THEGL	DYNC1I1	ZNF286A	ATP5J2	PCP2	BBIP1
XPO7	TMEM26	EIF4A2	FXYD7	HNRNPH1	GRHL2	TMEM231
RERE	TBX10	CPE	ITPR3	CHCHD10	CRYBB3	PTN
ZMYND11	CHRNA1	ANKRD36C	HEBP1	CALU	SYCP2	FAM161A
SUPT16H	POTEJ	SLC4A10	ACTA2	CRYAB	RERG	NEK4
PRRC2C	TRIM45	KCNMA1	UQCC3	MB	KCNE4	USP8
PPFIA3	FN3K	FAT4	PRKCQ	HNRNPL	KIF17	TSSK2
ATP1A1	CDH24	CHCHD3	CREB3L4	SMYD1	OR5M3	CC2D2A
KIF11	NGDN	RFX3	NABP1	PPIA	IRF7	PACRG
NCOA2	DCDC2B	RYR2	MAD2L1	SLC38A2	CRIP3	ROM1
HIPK1	TUBA3E	CSDE1	KCNQ4	CDH2	CASC1	MARK4
KMT2C	ALG10B	PCDH7	NT5E	TNS1	TTC22	CSNK1A1
PIK3AP1	MFSD6L	AKAP9	ZNF709	HSPA9	CDS1	BBS2
SEMA4C	KLK14	LINGO2	NMNAT1	RPL6	KCNJ15	CCDC39
RTF1	IGFL1	GNB1	EFCAB1	SH3BGR	FSD1	PKD2L1
IPO5	HGFAC	CLTC	SGPP2	TGM2	MB21D1	CSNK1D
NUP98	ATP5SL	MPPED1	CCDC65	HIST1H2AE	CPN1	ACTR3
ADNP	GRK7	HSP90AA1	STAT4	HIST1H2AE	MPZL2	CEP63
RET	NMBR	BIRC6	OLFML3	HIST1H2AB	EAF2	FSIP2
SHANK3	NUP88	ATP8A1	EHHADH	NDUFA5	TEKT2	IL6R
CACNA1E	44440	ZNF638	CYGB	HNRNPA0	PRR22	UBE2B
PCLO	MRS2	UBC	FAM83H	RYR2	GRID2	TCTN2
GAPVD1	BTN1A1	SCN3A	RNF103-CHMP3	MYADM	EFCAB12	BBS9
EPC1	POMK	MAPT	KIF9	MARCKS	TTYH1	PSMB4
RB1	TRAFD1	SLC1A2	PCDHGA1	ACTA1	PCDHB5	TMEM67
WNK1	SUN2	HMP19	FAM129A	APLP2	ICAM4	TRIP11
ZC3H18	OR52K1	DGKI	HIST4H4	EIF5AL1	CA12	NECTIN2
CDK12	GAL3ST3	HS6ST3	OVGP1	EIF5A	KHDRBS2	WDPCP
HECTD4	NTSR1	MGAT4C	ZNF559-ZNF177	RPL19	TTC36	PRCD
TNRC6C	HLCS	EXOC4	GIMAP6	RDX	RUNX2	ARL13B
SCN2A	TRAF3IP1	KIRREL3	PLIN3	TPM2	ALB	PCM1
TLN1	ULK2	TPT1	FLNC	MIF	EVI2B	CFAP221
BTAF1	DPH7	TSC22D1	PDCD2L	HDLBP	CDNF	CCDC136
EPHA7	C9orf50	TNR	PIK3AP1	TMSB10	RUNDC3A	RAB3A
COL4A1	XPNPEP3	RIMS2	AHRR	GNAI2	SPATS1	INTU
SIK3	SLC25A35	FBXW7	HDDC3	EHBP1L1	PSTPIP2	NCF2
KAT6B	LRRC23	44450	IFITM3	CTSD	SLC8A3	IFT20
ZFR	ZNF71	EPHA6	DUSP28	RPL15	HIST1H4D	KIF17
GSE1	TMOD4	NCOA1	TEX30	SDHB	LYPD1	CFAP70
PBRM1	TMEM212	PDE4B	RNF144B	CNN1	CCL21	SPA17
PUM1	SLC22A4	SPOCK1	EML3	TMEM258	FMO1	MCIDAS
AHCTF1	AARS	SLC38A1	SCRG1	PTMS	ADCY2	DZIP1L
TNPO2	EFS	GNAS	CHODL	TLN1	DNM3	KCTD10
AAK1	PARP10	CDH11	ANXA11	GOT2	NPM2	CLK3
RASA1	SRRD	RPL37A	MAP3K7CL	DHX9	POMC	DCTN1
CDC5L	VARS	PHF14	LETM2	MYL6	NXPE2	ARC
UBR3	SLC9A5	ATXN1	THAP10	APP	GPR27	NFIB
SCN8A	C10orf67	LDLRAD4	SNX33	CHCHD2	SYCE1L	POMT1
FNIP2	KRT27	ZNF292	CLGN	WDR1	LEFTY1	CRCP
PPP1R12A	ACP1	KCND2	IL10RB	ATP5O	LEFTY2	IFT172
USP47	TBCE	SACS	TACO1	CYC1	SLC11A1	SERPINA5
CCDC88A	FAXDC2	WDFY3	KHDC1	PRDX2	LY86	PRKAR2B
EIF3A	CLN5	KHDRBS3	GPRC5C	KHSRP	GP9	PRKAR2A
YTHDC2	CLRN1	NCALD	CTSK	SDHC	NEFL	PRKAR1A
KSR2	SPATC1L	GPHN	ADRA1B	DYNLL1	RASD2	PRKACA
ZMYND8	PRG4	DOK6	NPC2	SERINC3	GALNT5	MOK
MINK1	RAB26	SNTG1	MIS18A	VDAC2	TRAF1	GLI2
RFX7	APOBEC1	CACNA1C	SLC9A5	LPL	CP	EVC
TULP4	PHLDB2	NEO1	CASP6	RPL18A	MAL2	BBS7
MAP1B	RAB3IP	TMSB10	GRP	MYO18A	SUN3	DNALI1
USP42	ZNF677	TAOK1	SLC25A19	HINT1	SLC30A10	CCDC146
NPAS2	ZNF705G	ASTN1	TTC25	COPA	KBTBD8	ANKS6
ZSWIM8	DNAJC28	PJA2	FAM153B	NDUFS6	FCGR1B	TRAF3IP1
ITPR1	OR4Q3	GRIP1	LRRC66	RPSA	BTBD11	PROM1
COL2A1	DPYSL4	BASP1	LAPTM5	MLEC	SNCG	CST11
DDX42	MRPL23	USP34	GPD1	DAG1	GNAZ	RILPL1
CACNA1A	GTF3C5	GNG2	JDP2	PTN	AMN	NOTCH2
PHF12	SEPSECS	PCM1	TIMELESS	GTF2I	TRPM6	NOTCH1
CTR9	TBC1D28	KMT2C	HS3ST3B1	RPS11	LTK	RPGRIP1L
RBM5	KHNYN	RPL15	ZNF534	ATP5G1	SLC17A9	PDE6H
FRMD4A	PNLIP	ATP2B1	CCDC74A	COL18A1	MAPK13	TTLL4
HIRA	CD1C	CSMD2	PILRA	ATP1B1	PTGDR2	KIF2A
SETD1A	MRPS30	PAFAH1B1	FBXO2	PRRC2B	RGL3	ADAM30
NAA35	OLFML1	UCHL1	TATDN2	ATP5L	CCR10	KLC2
ELMSAN1	RDM1	SLA	EGR1	ATP5L2	CRYGN	C2CD3
RBM6	RAD18	RAPGEF2	IL16	SOX4	PCDHB3	CEP162
KIF1A	OR13C4	RUFY3	INPP5J	CSRP2	HLA-DRB5	ENKD1
MECOM	GINS2	TBL1XR1	CENPQ	OBSCN	HLA-DRB1	IFT80
MBD5	SLC2A10	PTPRS	PIEZO1	SPTAN1	PODN	GLE1
INTS6	QPCTL	CHD3	CASC1	MRFAP1	GCNT7	LYZL6
ZFHX3	POGLUT1	FAM49A	DNAH9	SRSF5	DMC1	WDR19
HEATR1	KIAA1683	AGAP1	SAPCD2	GNB1	VAT1L	FLOT2
SLC12A5	ZFP69	RERE	TEX22	SUB1	PCDH10	KLC1
NFKB1	BFAR	44261	ANKRD20A4	WNK1	HPSE	RABEP2
AFF4	WDR88	RGS7	PTGFR	PLEC	FXYD7	TCHP
RB1CC1	CLMN	CAMK4	FAM212A	PSAP	TBX6	RPGRIP1
SAFB	PCCB	TMEM132B	GRIN2D	COX7A2L	KL	KLC3
TRAPPC8	GCAT	NUDT3	TBXAS1	UQCRC2	CCDC27	PROM2
ARID4A	WDFY2	SCD5	SLC6A12	NDUFB10	MSR1	CFAP54
TRIO	RAVER2	TTLL7	ANKRD30B	44441	TMEM74B	CEP250
PPFIA2	CLDN25	PTPRG	SP140	ARHGDIA	NECAB1	HYDIN
KDM6B	PIGV	KIF21A	DNAH2	UQCRC1	ADAM32	TTLL9
SPTB	CFHR2	ATP8A2	RPL22L1	CCT6A	PLEKHG4	DNAI2
SOS1	TMEM106C	EXOC6B	ADCY10	KPNB1	PPFIA2	PLCZ1
AMBRA1	OR52B2	PEX5L	SYTL3	NAP1L1	SLITRK6	ADGRV1
UBE2O	CACNG1	FUT9	ANGPTL2	PPP1R14C	FSCN2	BBOF1
ZNF292	IL18BP	CDC42BPA	TRAIP	VCP	CRYGB	RSPH9
HDAC5	INA	PPM1L	HIST1H2AI	COX5B	TMEM220	ROPN1
SPAG9	TMPRSS13	SRGAP1	ANKEF1	DDX39B	THRSP	FBF1
FNBP4	ANKRD2	GRM3	CCDC150	RPS15A	FHDC1	CFAP206
RANBP2	SPO11	PDE1A	TSPAN12	PTGFRN	F10	ATG16L1
JAG2	MAD2L1BP	HS3ST4	ALG3	ATPIF1	CCDC150	CTNNA1
DNMT1	GPHA2	PRKCE	LFNG	ATP5I	SLC27A6	GLI1
ATXN2L	TBC1D2B	XRCC5	EPHX2	ATP5C1	RBP4	CEP41
XPO4	NPBWR1	DDX5	DENND2C	RPL27A	ARHGAP9	CCDC172
ARFGEF1	ZNF345	PLCL1	FGFRL1	MRPL52	CYP4V2	TEKT5
CSDE1	KLHL38	SLC35F1	RGS19	PABPN1	MAB21L2	GGA1
CUL1	RASSF9	RABGAP1L	OLIG1	HNRNPD	ADRA2B	TTC8
DDX46	PUS3	SORBS1	ISG15	YBX1	HCN2	CAV2
ZFHX4	TMEM130	RTN3	LAMC3	CBX6	C15orf62	NEDD1
ZFPM2	TRIM38	LRFN5	LENG1	CTSB	C6orf141	CEP131
NUP85	MRPL37	ARHGAP32	PLS1	ACTN4	PIK3C2G	RSPH1
BAZ2A	ACMSD	BMPR2	FANCD2	SLC2A1	TAP1	DZIP1
JAG1	GSTM4	SFPQ	ENPP5	CAV1	ZNF675	ATP6V0A2
ASXL2	TRIM51	SMARCA2	PUSL1	CBX5	ZNF708	SPATA7
SRRM1	WDR4	RNF130	PDLIM7	FABP3	ZNF85	PSEN2
KIF23	TTC19	NCKAP1	LRRD1	PRKACA	ZNF92	NUDT1
EZH2	ZBTB49	NXPH1	NGB	MACF1	ZNF735	CFAP126
USP24	ARHGAP15	CCNI	TPTE2	PYGB	ZNF429	SAXO2
CHD3	WDR11	DIP2C	CD58	C14orf2	ZNF732	TBC1D7
FLT4	NAGLU	PKIA	QPCTL	KRBA2	ZNF595	CETN3
UNC79	TMBIM1	STXBP5	STAT6	RPL26	ZNF676	DPCD
ATP2B2	UGP2	NF1	HEXIM2	AGRN	ZNF93	ATP8B3
DIP2C	SEMA4G	ARID1B	TTC12	TRIM55	ZNF681	CATSPER2
MAPK8IP3	MATN3	YWHAQ	ATF5	PABPC4	ZNF254	MAPT
PKN2	DNTTIP2	GABRB3	MMP2	MDK	ZNF98	ARL3
SETD1B	LRRC42	RORA	SCGN	RPS26	ZNF90	CD55
KALRN	TTC29	MAPK10	CELF6	RPL5	LRRN1	SLC26A3
CASZ1	HELZ2	TRPM3	EAF2	CFL2	RIIAD1	CYS1
44261	LCN1	ITSN1	PCSK1	EIF4EBP1	PABPC3	WDR35
PPRC1	DDX28	QKI	NUSAP1	HMGB2	PPARG	DRC3
SMCHD1	DNAJC1	EIF4G3	CENPW	MYO18B	C7orf31	ODF2
CAMSAP3	STYXL1	SDK1	CD226	PTP4A2	SGMS2	ODF1
PPP1R10	STX8	UBR5	S100A16	HOPX	DRAM1	ADAM2
HDLBP	ZMYM1	SOBP	SPTSSB	RBFOX2	AGMAT	BBS4
ZNF609	WFDC8	CLSTN2	CD3EAP	PSMB6	FAM26E	TTLL1
ARHGAP42	PRB2	PGM2L1	ZNF593	SWI5	DQX1	PHLPP2
RICTOR	SLC6A12	MEIS2	ANKDD1B	MAP4	MISP	GAS2L2
ZNF541	TBC1D24	CAMSAP2	CLDN15	ASB2	C11orf42	GAS8
FASN	ZFAT	CALM3	WDR53	SUCLG1	HOXA5	MET
ATAD2B	CD82	DPYSL5	MGAM	PCDHGC5	LPCAT2	CD46
DENND5B	PCDHGA11	PPP1R9A	POC1A	RPS8	NPTX1	MAK
HOOK3	LMBR1	SBF2	HSF4	NDUFB9	PTPRN	MARCKS
ARHGEF2	UROD	GRID1	SMN1	FBN2	TRPC6	FAM166A
KDM4A	CTSH	BRWD1	MYD88	BCAM	TRPA1	PIK3C3
RREB1	ZPBP2	MARCKS	SYNC	NDUFA2	SDS	RAB28
CHD4	ILVBL	LMO4	RANBP3L	UBE2D3	CRYBA4	AKAP9
HIPK2	ZNF311	DAAM1	DDIT3	RRAD	SYCE1	STK31
CHD5	TMPRSS4	SYT4	MRC1	ADCY6	MPO	MAP4
PLXND1	C4orf17	PRRC2B	ACBD4	NPM1	ADRA1D	RCBTB2
LRRC7	BPIFA1	GRIA4	FAM227B	OBSL1	SLITRK1	DCDC2C
ZFC3H1	ANKUB1	SF3B1	LURAP1L	CSRP1	IL20RB	PTK2
UBE4B	GDPGP1	PUM2	COL5A3	CPT1B	CCDC60	UNC119B
DOCK3	DNAJC10	PTK2	RASSF7	MMP15	TAS1R3	PRPH
DMXL2	ANXA4	MBD5	ANGPT2	SRSF3	SERPINC1	PRLR
UNC13A	MAN1B1	PANK3	STEAP2	AKR1A1	MIP	STX1A
HECTD1	ALG8	ITPR1	ZCWPW1	MIDN	PHF11	SPACA1
TANC2	GEM	CNR1	MYBL1	DLST	OMD	SPATA31A5
ROBO2	DBR1	NUCKS1	ANKRD55	TOP2A	SLC39A2	CCDC40
MAST1	GMFG	FER	KCNMB3	NDUFA6	WFIKKN1	CCDC78
POLR2A	MRPS17	SGIP1	FGF5	DYNC1H1	FBXL13	TACR1
TNRC6A	ZNF484	SCD	EMX2	TSC22D1	SYT13	TACR2
ESPL1	FBXL4	ZSWIM6	ZNF90	RPL10A	PRSS8	TBXA2R
CUL5	RBAK	SPAG9	TNFRSF10B	CCT5	TRPM8	TCP1
SAP130	GLT8D1	ZMYM2	CKMT1A	RPL38	MRGPRF	TOPORS
SLIT2	TDP2	KLHL1	DHRS3	ARID1A	NIM1K	TBC1D30
APC	MATN4	MCTP1	ARC	CALM3	PHF21B	ADAM21
USP48	EARS2	ANKRD17	CNPY1	RPL31	SATB2	CDC45
FGD5	NXPE2	EPHA7	SFR1	HNRNPF	SLC2A9	CCDC113
CKAP5	GCNT3	ZNF462	TAC1	BAG6	TOMM20L	ULK4
UPF1	INHBE	ZNF804A	KIF11	ARF1	MUC2	PRKG1
CHD1	TIMMDC1	GPC6	POSTN	PDIA3	FAM228B	IFT81
FAM120A	FAM221B	USP22	MED11	YWHAG	NANOS1	NPHP4
CUX1	LRR1	CHD9	ADHFE1	NAP1L4	TULP2	EFHC1
NFKB2	BCAM	VPS13C	ITPRIP	XIRP1	HFM1	WDR11
KDM5A	PNPO	GAS7	NINJ1	MRPL12	C4orf47	GNAT3
TEX10	ALG1L	ACACA	SPATA9	P4HB	TRPV4	KIFAP3
CASKIN1	OCM	AGTPBP1	STEAP1B	CAP2	RNF152	PIN1
DSCAML1	VSIG10L	ARHGAP5	SGSH	GJA5	DMRTA2	DYNC2LI1
LARP1	TRMT2A	IGF1R	TRIOBP	CLASP1	HSD17B14	CFAP43
DICER1	ANXA6	R3HDM1	PLGLB1	AKT1	HGFAC	SSNA1
SIPA1L1	PMF1	PTPRT	HYAL3	SERF2	ITIH2	TBC1D21
MYH10	PMF1-BGLAP	CAMTA1	CCDC13	LENG8	IGSF11	DCDC2
CECR2	DYNC1I2	ABI2	SOX1	MYH9	RYR1	EPS15
NCOR2	PSAT1	PLXNA2	CRISPLD2	RMI1	EGR3	RHO
ANK1	AADACL2	MGEA5	CKS2	PFKL	PLCD4	ARL6
ZNF236	SLCO4C1	DPYD	SST	FAU	MYLK4	SHANK2
ABCA2	CD300LF	OSBPL8	TRIM58	CLTC	ACE	B9D1
RC3H2	HAAO	HECTD4	PCGF1	ANAPC5	C1orf56	CAPZB
ZNF638	VPS51	SNAP91	HMGA2	PSMC3	DHH	CALR
PDGFRA	COL9A2	ARHGEF7	TNFAIP8	PNKD	GIPC2	SLC26A6
GPATCH8	FLOT1	FARP1	COL6A3	HK1	ANGPTL1	DPEP3
GRID2	ACOT4	EFNA5	ORC6	IGFBP4	GLB1L2	NSUN7
PRPF4B	DHRS12	GAP43	MYL5	KIF5B	ZDHHC23	MROH2B
CHD9	GMPR2	THRB	SMAD6	RPL13	TAS1R1	TCTEX1D4
KIF1B	L3MBTL2	CAND1	PAFAH2	CNN2	FBXO44	TCP11
KDM4B	ATG2B	44442	ADAP2	POPDC2	HGF	CFAP20
ANKRD28	NLRP10	GDAP1	LYVE1	CDK4	KIF9	ODF4
CAMTA1	ABI3BP	FBXL17	HIST1H3C	PRRC2C	DENND1C	DRC1
HIVEP1	NT5M	ERC1	CHAF1B	YWHAZ	RAB11FIP4	TSKU
GTF3C1	MUC5AC	ATP5A1	OPRM1	LAPTM4A	CA7	CBY1
TNRC6B	SUMF2	GSK3B	RHOV	SZRD1	CIITA	MXRA8
TENM4	HRC	KIF21B	CHURC1-FNTB	EEF1G	SPAG8	IQCD
SEC24C	EPB42	KIFAP3	DNAJC4	COX7A1	KCNA6	TOGARAM1
TTC28	BCKDHA	RPS11	PSMC3IP	ST13	CLEC4G	CENPJ
SCN3A	NAA40	JAKMIP2	BRICD5	CDH5	GLI1	PARK7
TET1	NT5DC4	MPRIP	NUTM2D	PTPRS	M1AP	EVC2
NUP153	SERPINA4	MYO9A	AK8	CAPZB	EYA4	CATSPER3
BAG6	NIF3L1	RASAL2	FDXR	ANXA2	LGR6	ARSA
EPHA4	TMEM14B	SH3GL2	ZNF488	MARCKSL1	CALML4	CFAP161
ZMYM4	GNLY	KIF5A	TM4SF18	DNAJC7	TSTD1	TTC30B
TDRD1	NIN	ASTN2	TMBIM1	ACIN1	PBX4	USH2A
MAP4K4	GOLM1	DMXL2	TRIM47	PSMB1	KCNK4	MFSD14A
BSN	NUPL2	HMGCS1	TNFRSF1A	POLR2A	CCDC68	ERC1
NCOR1	MYCBPAP	GTDC1	ACBD7	PLXND1	UPB1	PTCHD3
BAZ1A	UGT1A5	FYN	CHDH	IDH3A	SLC22A3	SPACA7
JAKMIP2	PDPR	CNTNAP5	NANOS1	CLIC4	SDCBP2	KIT
CLASP1	ABCC9	PTBP2	DBP	RPL35	KLHL35	MAPK15
HTT	C19orf71	CAPRIN1	URGCP	CREB3L2	SLC22A18	SH3GL3
RELN	DRD4	SPIN1	PHF11	LCOR	STAT4	CENPF
BRPF1	FARS2	FAM19A2	LSM10	HNRNPUL2	SLFN14	BMF
R3HDM2	ANGEL1	PIP4K2B	CIB1	NEDD8	ARMC2	SPATA6
MYO9B	TADA2A	FAM171B	P2RX7	RBPMS	PDE4C	NEK8
PHF2	ZNF165	EML1	LHFPL5	TRDN	ATP6AP1L	TUBG1
PSME4	NSUN3	PRKDC	PRR5-ARHGAP8	DNAAF2	BDKRB2	OPN4
PRPF8	CCDC13	DDX6	PROSER3	JPH2	RNF43	CCNO
KDM2B	RIMBP3	KCNB2	CRIPAK	PEBP1	KRT20	CATSPER4
SF3B3	PLTP	TNKS	SYCE1	NCAM1	SLC23A1	TMEM107
SYMPK	ATP13A2	PICALM	RYR1	COL5A1	GPR179	PMFBP1
PKD1	NME1-NME2	YBX1	HAPLN1	ROMO1	LRGUK	MKS1
TEK	NME2	MYO16	CHAC1	DPYSL3	CADPS	PCNT
ARHGEF12	SEC24A	RPS8	NDNF	PYGM	SRCIN1	CCDC65
PITPNM2	SEMA3E	FAM168A	ZNF572	DYNLL2	CHSY3	ZPBP
DST	PGPEP1L	MYH10	DCDC1	SOD1	AGT	VDAC2
PDS5B	MB21D1	HECTD1	LGALS3	NCOR1	RGS17	KIF5B
PTPRT	DNAJB7	SOX4	FAM20A	NDUFB7	CUZD1	CEP152
WDR7	H6PD	RPL37	KLF16	PPP1CB	TSPO2	DYNC2H1
TNIK	TXK	UNC79	NACA2	ANP32B	CNTN3	CROCC
NOL6	PSRC1	ALCAM	KIF24	CAPRIN1	SDR42E1	CCDC96
MLLT10	RPA3	CALN1	KCTD11	ANKRD11	C5orf52	VHL
ATP2C1	ADHFE1	NAV1	HIST1H3J	FKBP8	ATP2C2	INPP5E
UBE3C	XRRA1	SEMA3C	TNIP2	ATN1	SOX8	DAAM1
SYCP2	GMPPA	MAPRE2	MGST2	LMNB1	P2RY13	GPR37L1
ACAN	KLF11	KMT2A	ANKRD31	CD93	OTOF	MYO7A
FAT4	KCNMB3	CDK14	CCM2L	NFE2L1	L1TD1	DNAI1
MED12L	TAF6	DNAJC6	F11R	FERMT2	CACNG7	IQCF1
CEP350	SIGLEC15	DTNA	PDE6B	IVNS1ABP	PLCH1	SPACA9
MAP3K4	LARS	PDE10A	SLC45A2	EWSR1	IFITM5	SDCCAG8
SHANK1	CYP2E1	MTURN	ZNF707	PAPOLA	CATSPERD	DNAH11
MTOR	CRTAM	NOL4	SEMA3B	NDUFS1	HCN3	SLC9B1
NAV3	CELA3A	PHIP	LINC01125	RHOC	HAS1	CDKL1
PRRC2A	BLOC1S6	RPL5	TNFSF13B	C7orf55-LUC7L2	SMIM6	CFAP157
ARID4B	TM2D3	NCS1	FLT3	UQCRFS1	TEKT4	CEACAM1
PTPRF	NME9	PSAP	PIK3CG	NREP	TUB	RSPH4A
CUX2	CRISPLD2	FOXP1	ZDHHC1	EIF4B	ELOVL2	BBS5
DIDO1	IRAK4	FAM172A	HRH1	SND1	MPL	KIF3A
PHF20L1	TMEM171	UBR4	TEX15	SPEG	TWIST2	SQSTM1
PRRC2B	TRIM15	CFL1	EPPK1	MCAM	MSANTD1	CFAP69
ASAP1	NCCRP1	SESTD1	MME	U2AF2	MAGEL2	CEP83
DSCAM	CNPPD1	MARK1	OLFML2B	QKI	LRRC46	SNAPIN
NOS1	MBTPS1	SYT11	SSPO	COX7C	SYT1	SPAG17
RNF31	CMA1	CACNA2D3	RHPN2	CAMK2A	LRRIQ3	IQCB1
DOCK9	KIAA1841	LUC7L3	SLC6A13	SDHD	TNNC2	PLK4
SPTBN4	SNRNP48	SRGAP3	RANGRF	SDHD	VWC2	SMO
TENM2	AKR1B10	ST6GALNAC3	ENG	TTC3	WNT7B	SPATA6L
MAP1A	PIH1D2	CKAP5	PINLYP	H2AFX	SPOCK1	ODF3
CEP170	PLIN2	FZD3	RASIP1	SF3B2	ITGAD	RAN
TNS3	GALNT3	RAP2A	LIMS2	TARDBP	OPN1SW	PLA2G3
SCAF11	CEACAM18	PDE4DIP	MTX1	MLF2	KIRREL3	SEMG1
SEC24B	PATE1	RPL3	UBXN10	UNC45B	C1QL1	EPPIN
SOGA1	SERPINB7	HECW2	GAR1	ANP32E	C1RL	ARMC2
ATRN	EXOSC1	KIF3C	TRIM25	ABCF1	PSTPIP1	KNCN
PDS5A	DPP4	SORBS2	SPATC1L	CLIC1	PAQR6	DNHD1
ROCK1	ATAD3C	TUSC3	CPT2	FKBP3	IQCD	IFT140
DNAJC13	NR1I2	CHN2	METTL18	LAMA4	NRN1	NME8
XRN1	LILRA5	SRPK2	SUSD5	RNF10	HLA-DQA1	CCDC170
ANKRD12	NPHS2	EHBP1	TIGD6	HADH	HLA-DQA2	CATSPERG
RAPGEF2	POLR2E	LRP1	C1RL	METAP2	PLEK2	MAP1LC3B
LAMC1	PSKH2	SHISA9	SLC29A3	MFN2	NOXRED1	FAM170B
NEDD4L	PI16	USP24	PARP3	ADD3	CNR1	CEP19
KIAA0368	SNRNP35	HMGCR	EXPH5	NAV2	LGALS3	CLTB
ASXL3	C6orf58	FHOD3	EPHB4	RANBP1	CCSER1	TEX101
VCAN	BTBD9	RPS24	THOC6	RHOA	HOXB5	SKIL
SIPA1L3	BBS7	HIVEP3	SPAG17	H3F3A	ZNF365	CCDC103
CLASP2	ARSB	DYRK1A	TMEM150A	H3F3B	B4GALNT2	TMEM225
HERC2	CHST9	NCKAP5	GPR88	PCBP1	TUBB3	SNTN
ACIN1	SLC46A3	JAZF1	SP100	ALDH1B1	TUBB3	RNF38
SETDB1	ACY1	FTO	RGS16	RBBP4	BTN1A1	CNGA1
CACNA1I	CD84	ARHGAP35	DLL4	FAM162A	SLC44A3	IL6ST
COL1A2	SLC30A6	PLEKHA5	ZNF57	TCP1	MCTP2	TEX22
DMXL1	SKOR1	ZNF704	PLAC8L1	DDR1	TMEM215	IRS1
SMARCA2	TCERG1L	KLF12	SLC2A10	SULF2	RTN4R	ITGA1
ARHGAP21	OR10A6	PTPN4	OCLN	FSD2	SLC10A6	HSP90AA1
NFAT5	PPP2R3C	CACNB4	PTPRC	CNBP	FAM19A2	CATSPERE
FBN2	SP140L	ATP2C1	GLIS1	PFKM	TREM2	DNAH9
SETD2	MIF4GD	EPHB1	RNF212	CTDSP2	SH3GL2	DNAH7
RIMS2	DHRS7B	ASIC2	LCP1	TP53INP2	HSD11B2	DNAH1
GLG1	SLC25A32	CELF1	COL22A1	IPO5	CHRD	MAPRE1
PTPRC	ENPP6	CAMSAP1	CMTM3	COX17	SCG3	FOXJ1
ATAD5	FABP9	44446	DUSP5	KMT2D	PTGER3	EHD3
EP400	STK19	SMG1	GBGT1	RPL12	LAMC3	FOXE3
WNK2	OR4X2	ASH1L	IL20RB	SH3PXD2A	NEFH	CFAP36
ZC3H13	PARP15	BPTF	S100B	TCF25	TMEM171	CEP89
CACNA1G	PTPN3	HNRNPDL	TDRD5	MAPRE2	LILRA4	AK2
CSMD1	ASZ1	PKP4	RARG	ITM2B	ESR2	SPAM1
FRY	NBR1	PRKAR2B	ENTPD3	RPL36AL	CBS	SAXO1
IGF2R	PRELID2	HNRNPC	CHCHD10	PGM5	STARD6	CUL3
WDR33	CCDC114	TUBB2A	TSPAN33	YWHAQ	LDLRAD2	TSPEAR
UBR2	ARHGEF40	CCND2	GNB3	MAT2A	PRR7	CCDC178
CACNA1D	TAPBP	STRBP	ZIM2	CASQ1	GCNT4	CCDC114
ARHGEF11	GREB1	NEUROD6	CCDC129	FKBP1A	NOTUM	NPHP1
THSD7A	OR4C15	RB1CC1	ALS2CL	NAA15	HIST1H4H	MKKS
ROCK2	CERS5	MAN1A2	MNS1	DNMT3A	RPL39L	CABYR
ACACA	DNAAF2	APBA1	ABCA7	NFIA	TMEM81	DLG5
COL11A1	MX2	TCF12	FCGBP	DYNC1I2	AQP8	LOXL1
NUMA1	NEK8	CANX	DUSP2	PLXNB2	ALDH1L1	AMBRA1
AQR	SGCZ	MBOAT2	ALPL	TSTD2	CYP4B1	ARHGAP35
ITSN1	TRIM49B	MAP4	CLDN1	CDC42	SYCP1	ATP2B4
BRWD1	GFPT2	CBX5	KRT19	JUND	ESYT3	TRIM36
USP32	SLC27A2	FRMD4B	DOCK6	PRPF8	AMZ1	IFT27
NUP205	ANKRD29	ABLIM1	MYPOP	MATR3	THEMIS2	CLCF1
HERC1	CCDC107	CHSY3	FBXO5	ILK	MICA	AK8
MN1	XRCC1	CTNNB1	PSPN	SFPQ	MICB	RILPL2
UBP1	RNF157	PRKG1	DTX3L	TMEM256	IL10RA	HSP90AB1
PLCL2	PYROXD1	KLF7	DUSP15	NDUFB6	SH2D4B	SPATA4
ZDHHC5	TTLL11	NBAS	CDH1	SET	F5	AHI1
LUC7L3	SERPINA5	RORB	KCNJ8	NID1	SERPINA3	ARFGEF2
DNAJC14	CLIC3	MTSS1	SARDH	SNRPD3	NOG	KIF5A
TM9SF3	PLEKHA7	TP53BP1	TRMT10A	ECE1	EFCC1	GAPDHS
SATB2	LGALS9C	BDP1	PPP1R35	THRAP3	CCR5	ACRV1
MAP3K2	FOLH1	SPIRE1	MYCT1	NDUFS2	SLC51A	TTLL5
ETV5	PIGL	SON	PDE11A	PEG3	HTR3A	CEP126
HNRNPM	PARP11	VPS13B	HSPA12B	MAP4K4	ST14	EFCAB2
PIAS1	ALG11	SMYD3	HMBS	LAMA5	FAM19A5	DKKL1
DLL1	SLC25A30	YWHAE	BRCA2	GATA4	IQUB	DDHD1
IGF2BP3	OR9Q2	KIF2A	RAB11FIP1	SSR3	PCP4	EZR
EIF4B	EIF2A	ZNF532	RAVER1	RPS6	ISG20	CCR6
PRMT5	AGK	CADM3	ASIC4	VCL	CCDC89	LCA5
CUL4A	CTSO	HECW1	TP53I3	FXR1	TMEM121	GSTM5
DDX17	CTSA	TNRC6B	APOL2	ACADL	ITGB7	KIF5C
RALGPS1	BTN3A1	RALGPS1	ZNF257	UBAP2L	VWCE	TCTE1
VCP	C3orf30	UNC5C	RNASE1	CAPZA2	SPOCK3	ARPC2
KAT7	CACHD1	PHF3	GMNN	KIF1C	MLKL	CALCR
CTNNB1	NCAPD3	NELL1	SGCG	EIF5B	FAM83G	LYZL4
PRICKLE1	BRDT	SH3GL3	KDM8	MKI67	CATSPERG	SSTR3
FERMT2	FGD2	RNF150	ACADS	RPL30	A4GALT	TTLL6
RANBP9	FAM198B	INPP4A	SAMD15	ADD1	NME8	PCSK4
PTPN6	OR6C4	RPS6	MORN3	COX6C	TRIM14	INVS
RFX4	MS4A2	RPL19	SLC46A3	TNRC6B	CCL19	ACE
XRCC5	ECHDC1	MED13	DECR2	TOMM7	CTH	EQTN
TLE4	CHCHD6	ANKRD44	RDH10	SMARCA4	COL22A1	TMEM80
PAN3	PRSS42	AKAP11	HTATIP2	44446	PACSIN1	CTSH
CMIP	OR52M1	RPL32	GSTM4	HSP90AA1	CCBE1	CYLD
AHR	FBXO40	EXT1	CYSLTR2	RPL23A	DLK2	ENO4
PCIF1	GPAA1	CCBE1	ROBO4	HIGD2A	NFKBID	IFT57
XPR1	ACTR6	UBB	ENO4	SRRM1	FAS	CFAP100
INTS10	TSSK4	TIAM2	CABP7	NDUFB5	ZNF354B	GABARAP
MARK2	CHRND	ARL15	FRMPD1	MTSS1	HOGA1	DISC1
ZNF608	KIAA0100	WDR47	IQCC	ATXN2L	LCP2	WHRN
TLK1	FUT10	MGAT5	ACKR1	HNRNPUL1	NTNG2	SNAP29
GABBR2	CYP2A6	FRY	CRLF1	SVIL	TICAM2	CETN1
SFSWAP	PDE1C	CDH12	FBXO6	PSMC2	MYOM3	GLI3
TMEM63B	TPSB2	TSPAN5	FOLH1	CHTF8	C2	FABP9
MKL2	RFX8	SEZ6L	TMEM132E	SMARCC1	SERPIND1	SPESP1
DAGLA	STEAP3	MARCKSL1	HSPB1	INPPL1	SGIP1	TMEM190
ARMC8	ZDHHC4	IVNS1ABP	ADAM29	KDELR1	LEPR	PKHD1
EIF4ENIF1	PLEK2	AZIN1	TRPV1	NRP1	KLHL10	PDIA3
DPP10	KIAA0825	HNRNPK	TCTE1	GDI2	VTCN1	TTC25
CIC	TMED5	TENM3	PDLIM4	BYSL	ACSL6	ADAM15
PACS1	AFG3L2	CUX2	IL4R	PDLIM5	KCNK2	PRSS37
NCAM1	MCM3AP	RPS23	POLQ	GABARAP	GRM1	CDHR1
CTNND1	EXOC3L4	UBR3	ZNF284	RPL37A	CDKN2B	PIK3R4
HNRNPUL1	SVOPL	DHX9	HIST1H2AB	ARHGAP31	ATP1A4	GUCY2D
STAT1	RBKS	CTTNBP2	VSTM5	FBXL22	WFDC10A	SPEF2
PRDM16	CPT1A	CCDC50	NAT16	RPS24	GGN	CCSAP
JARID2	GSTO1	GRIK3	PRKCG	NNT	ZNF616	FFAR4
USP37	ANKRD65	REEP1	GRIN2C	LRRFIP1	ZNF665	SYT8
PAXBP1	EOGT	SCAPER	SLC2A12	C5orf15	ZNF761	LRGUK
ARHGAP31	GINM1	TRIP12	TRIP6	HRC	ZNF600	TXNDC8
GLI3	THEG	NIN	GINS2	FAM120A	ZNF347	PPFIA3
KIAA0232	PARP9	HNRNPH1	TMPRSS5	ALPK3	CHRNB2	CNTFR
SIN3B	A1BG	RALGAPA2	TRAPPC6A	EIF3L	PBLD	HK1
PIK3CD	PCDHA7	KIAA1549L	HSPA1L	CHCHD3	CILP2	PLA1A
OSBPL6	CCDC175	SORL1	SAMD9L	PCBP2	HIST1H2BD	GPI
USP19	KDELC1	ATP5B	IFI27L2	RTN3	FGF2	GNB1
CAMSAP2	ZNF852	BAZ2B	STC1	NDUFA11	CCDC148	SLIRP
TRAPPC10	BUB1	REV3L	TXK	TEAD2	PROKR2	TULP3
ATP9A	SAMM50	NCOA2	HIST1H4A	CAND2	CRLF1	DNAH2
MORC2	PAOX	RPS20	MBD6	PXDN	ALX4	SPAG16
RBM27	FAM217A	PDS5B	SHKBP1	HNRNPDL	SLC35F2	CCDC151
RASGRF1	B3GNT8	CPSF6	GREB1L	PSMB7	NPHS1	CATSPER1
QSER1	DPPA2	AFF4	ESR1	ATP6V0C	MAS1	POC1A
KIF26B	DDX54	SYBU	PIGW	NDUFA8	BLK	HYAL3
NEURL4	CHRNE	SYNE2	RAD51AP1	RAN	CYP27B1	USH1C
CCAR1	OR11H4	ADCY2	TSPAN15	NDUFA10	COL24A1	NPHP3
NFASC	PLEKHH1	SMAD2	GPX3	PHB2	ARC	LDHA
KDM3A	KLF17	SLC2A13	CCDC86	CCDC141	TMEM178A	IZUMO1
SLIT1	KRT25	EPS8	GLIPR1L2	HSBP1	SLC10A1	KLK1
PLXNA4	ADIPOQ	DOK5	CDC6	SMC4	TMIE	DNAH17
KIF13A	GNPTG	ZFAND3	ACADL	TRIM28	SPATA18	JAG1
RALGAPA1	TLR4	MPP6	H2AFJ	ATXN7L3B	NR5A2	ITGB1
MUC5B	FBXO16	RIF1	TGFBI	TGFB1I1	IL1RL1	LIFR
LRP2	PINX1	ZC2HC1A	SPC25	GLO1	TCTE1	PSEN1
RYR2	SCCPDH	FRMD5	WDR92	SOD2	GAL	KIF7
ZNF777	FN3KRP	KAT6B	HRASLS5	NDRG2	GABRG3	SPAG6
HNRNPK	NAGK	EIF4B	SOWAHA	PDHB	SCG5	ARMC9
CCT3	CEP85L	NCAN	CDH26	SF1	LAX1	CLUAP1
GATAD2B	TMEM80	ZNF644	RSG1	PPP2R1A	CHRM3	SUN1
PPP3CB	SLC10A6	DICER1	IL10RA	RPS17	CD5	WRAP73
TAB2	CEP76	PHACTR3	ADPRHL1	TBCA	CD200R1L	DNAJB13
DDX5	MRPL38	GNAO1	FNDC1	TUBB2B	CD200R1	VEZT
CARM1	AFMID	DOCK7	EIF3C	ARPP19	OAS1	NEURL1
ZNF592	P2RX6	GABBR2	FRK	ASIP	FAM46B	CCDC66
NPLOC4	GHDC	CDH10	GADD45A	RALY	ABHD15	TEKT3
SUZ12	MLF1	GLS	ZNF367	PAIP2	GPR63	PRKACB
NRBP1	UGT2B4	PTEN	ASL	SEC31A	LILRA5	TMEM17
PTPN11	GPR149	LONRF2	GDPGP1	GPX1	SLC7A9	TTLL10
DLGAP3	CYB5R1	CHRM3	CENPN	SMDT1	CD80	DNAH5
CACTIN	SAAL1	GABRB2	FAM89B	MICAL3	P2RY14	DNAAF1
PELP1	GALNTL6	CD47	ORMDL2	SLC16A1	TBC1D2	TSSK4
KCNQ2	CD200R1	MAGI1	THAP8	TUBB4B	HIST2H2BF	CCP110
LARP4B	BCKDHB	PRKCA	RTKN	OXCT1	ASB15	TACR3
EPC2	SGSM2	NAP1L1	CCT6B	PPIB	ABCB4	IFT88
KANSL3	NUTM2F	ALMS1	TFR2	PKP2	SHPK	ZPBP2
GRAMD4	KRTAP29-1	FABP7	SERINC2	PEA15	SHPK	MNS1
KIF2A	MFHAS1	CYFIP2	ZNF524	MSI2	USP18	PIFO
MKLN1	MCMDC2	KIAA1211	ZNF579	WDR38	HAL	PKD2
FOXP1	LRIT2	SNAP25	TPBG	LAMP1	NME5	OSMR
ABL1	FBXL6	TLE4	MRM1	MAP1B	RASGRF2	ABCC9
PAPOLA	KARS	PREPL	NPIPB5	PDAP1	CHIT1	CFAP44
ZZZ3	GTPBP3	CDH13	BCO2	DDX6	GABRB1	KIF19
GPHN	WNT10A	NACA	FGF17	PRMT1	RGS22	TAPT1
BRPF3	POTEI	FMN2	HPX	NYNRIN	SLC25A34	TUB
PNISR	NID2	UBE3A	SOX13	MAZ	PRKCQ	CDK10
MGAT5	EML6	PPM1E	WDFY4	CDV3	SHISA9	ATG7
DNM2	RGS12	ATF7IP	HIST1H2BH	44450	MFSD7	CCT6A
GRIN2A	GPR180	EPHA4	E2F1	PHPT1	FGFR4	FANK1
TTC7B	ATAD3A	CCSER2	BORA	MPRIP	SBSPON	FNDC3A
THRAP3	FBXW9	CDH18	SSUH2	RTN4	MEGF11	CCDC181
BMPR2	MPL	KMT2E	KIAA1683	YWHAB	WNT9B	DNAJB1
PTPRA	AARSD1	NFASC	COL4A4	VEGFA	GJB2	POC1B
GRIK3	XKR9	NEFL	PAMR1	CBX3	TNFRSF14	DRD1
IPO13	IQCC	GNAI1	HELZ2	PBRM1	HPSE2	RP1L1
AP1G1	COG4	PEBP1	PNP	COPG1	CST6	PRSS55
ASTN1	KRT38	PBRM1	NPIPB3	ZYX	SPAG16	IQUB
MAP3K1	PDHA2	SET	KLF5	RPL11	SCN8A	TXNDC15
JAK1	FBXL8	FRYL	TDRD6	HIPK3	KCNK1	GNAT1
ANKS1B	P4HTM	RPLP0	MX1	RPS23	GDF9	CDC14A
SENP6	C19orf44	RANBP2	DNAH11	GHITM	LRRC25	ATG14
SMG7	ZCCHC7	ZMYND11	TEAD2	RAD23B	SLC1A6	TMEM216
ADAMTS6	PAFAH2	SRRM4	DNASE2	AK1	TMEM91	CAPN11
ATP13A3	BCL2L12	USP47	EDN1	MAP7D1	ACKR2	SPINK2
FNDC3A	MEIS3	LCORL	CD101	VASP	ATF7IP2	TXNDC2
PTPRM	DENND6B	YWHAB	NECAB2	LDHB	NEFM	SLC2A3
CACNA1B	RFNG	PUM1	ADAMTS1	NDUFS4	SYTL1	DYNC1I2
CELSR3	DHX29	NMNAT2	GYPC	CLUH	BSPRY	DDX6
FBXL19	ANPEP	ENAH	CASP7	RPL3	RAB3B	PPP1R32
CREBRF	IL32	SGCZ	GADL1	NKX2-5	MZB1	SLC9A3R1
HDAC2	TRIM10	RPL13	STRIP2	PGM1	LIPG	AGBL4
SP1	INSL6	PID1	RNASEL	PSMA7	XRRA1	SCNN1A
MAPK8IP2	UBA6	NEBL	RBP4	HIF1A	FGD3	PITHD1
ARCN1	LYRM1	ZBTB20	PRR5	CD164	KCNQ4	AKAP3
COPS2	MAPKAPK3	FUBP1	JOSD2	ERGIC1	RHO	ALMS1
SALL4	LTBP1	KDM5B	TGIF1	PPP2R3A	NXPH3	PFKM
PSMD3	TUBGCP4	RAP1GDS1	TMEM17	GPC1	SLC6A1	BSG
ZNF148	ACAA1	XPO1	FGF1	UGP2	RANBP3L	EFCAB7
PPP2R5E	OR5M3	SCRN1	HERC6	RPL23	C8orf46	CSNK2A2
TAF3	POLH	PEG10	KCNAB3	SNRPB	HOXD3	MLF1
AFTPH	ATR	ZNF280D	FGF10	TAOK2	RHAG	CAPZA3
RANBP3	SLFN14	RGL1	FBLN7	SLC25A39	THEM6	PDE6A
WDR43	CRYBA4	CAMK1D	KCNJ12	LDB1	PTPRCAP	CAV1
CLK2	MS4A12	FSTL5	MESP1	APOBEC2	LHX2	AGBL2
ARIH1	EFCAB3	APC	GPR17	GARS	LRRC73	ALDOA
LMTK3	TLR10	TMEFF2	FZD7	DDOST	ASB5	DEFB1
MLLT6	AUNIP	DOPEY1	TCTE3	GAA	CLDND2	TMEM95
EPHB2	FAM105A	NCOR1	CNDP1	EIF4A2	DHX58	PRAMEF27
DDX21	WDR74	ARGLU1	SPA17	EFNB3	TTLL10	PATE4
AGO3	ZNF283	GABRB1	OSMR	CTDSP1	KCNN4	CATSPERD
SGIP1	CYP2F1	CXADR	CGN	EIF3C	CLDN22	NIN
CLIP2	ARHGAP22	ITFG1	FAM43A	EIF3CL	LUZP2	TPGS1
USP15	MICU3	RPL31	GALNT12	AHNAK	CACNG4	TTLL8
OTUD4	COQ4	ELMO1	IL34	PCDHAC2	CDH1	CCDC63
ACTN1	CHMP4A	ZFPM2	MDH1B	CASQ2	SLC16A5	NME5
ITCH	TRIM21	DSCAML1	RBM44	SRSF6	SLC4A5	EHD1
SYCP1	ECM2	MIB1	KLF4	SURF4	ASB16	SCLT1
SETD5	C3AR1	PNMA2	PCSK9	SRF	SFTPC	PTPN23
CACNA2D2	GPR84	SESN3	HIST1H2AJ	ARL5A	CSTA	NME7
DCHS1	RGP1	NIPBL	TNFAIP3	PDLIM7	GPR65	DNAJB3
LMNB2	TREM2	SCARB2	PPP5D1	TBX5	FGF7	MCHR1
CNOT4	DFNA5	NHSL1	RET	COL5A2	RBM11	GPR157
TFCP2L1	MND1	WNK1	SDHD	HIF3A	ZMYND10	TTC26
SAMD4B	SPATC1	KCNT2	GIMAP4	TXN2	CD46	RABEP1
API5	CLCA1	RGS6	CCDC121	RAD21	CFAP74	TBATA
GRIN2D	RNASEH2B	ZNF148	SYNE3	YBX3	C20orf173	ABHD2
NOP2	TOR1AIP2	G3BP2	GYG1	PKP4	MSTN	CRLF1
FXR2	RNF181	IMMP2L	CA13	TBX20	DTX1	DLEC1
PTPN12	CCDC28B	SORCS1	SCARF1	YWHAH	AGBL4	SPACA6
PARP6	EPHX1	TLN2	KCNE1	WDR82	TNFRSF11A	CCDC88A
ZC3H11A	NLRP4	STAU2	NCKAP1L	NPPB	PAMR1	IQCE
ZNF423	TRIM16	RPL11	CENPA	EXTL3	NWD1	VPS13A
ANKIB1	DYNC2LI1	ELAVL2	SAMSN1	SRSF11	NR1H4	EFCAB9
ST5	GIPC2	HP1BP3	TNFRSF1B	TEAD1	UGT1A1	ATP1A4
ASAP2	IDO2	CBLB	SDCBP2	C19orf70	UGT1A10	DEUP1
AFF3	TEX26	AMER2	METTL12	ENG	UGT1A7	LZTFL1
FAM135B	CALCR	RPS18	CHKB	HSPA4	CHRNB4	PGK2
PRDM2	ERAL1	SARAF	ZFP37	GTF3C1	PMFBP1	ICA1L
TTC17	RTCA	SLIT1	SHE	RAC1	HPDL	RILP
TCERG1	MYRFL	RABGAP1	EFNA1	MBTPS1	ODF3L1	CFAP45
PRPF19	MED17	ANKIB1	RNF32	CNN3	GDF10	TTLL11
TBL1XR1	PRSS58	ADAM22	CHRNA5	PDE4DIP	TMPRSS13	SPEF1
PAFAH1B1	RRP1B	ATXN10	MUC20	SMARCC2	PTPN7	TTLL3
RNF38	TMEM175	ADD1	CCNE2	APOE	APOL6	DRD2
SP3	ARID3C	NSD1	BMF	BZW2	KLK3	DRD5
MAML1	MRPS35	BRAF	EFNA2	ARPC4	KLK2	AKT1
ZNF217	ACKR4	SREBF2	ADAMTS2	CCT8	HIST1H4C	AK1
ESCO1	COG8	MAPK1	IL11RA	IDH3B	HIST1H2BB	GRK3
PRKCD	FRRS1	ASAP1	KLRD1	NDUFC2	DGKI	ACR
EEF2	NARS	INPP5F	SOX21	RPS25	SP6	FSCB
NDST1	OR56A3	MPPED2	RAB3IL1	R3HDM4	SLC26A1	RSPH6A
ARHGEF7	DOCK5	PGAP1	FBXO48	ITM2C	HIST1H2BM	TBCC
NFATC2	ACSL5	ADNP	TESK2	ARF4	HIST1H1B	CNTF
CDC73	EXOC2	ANO4	CTU1	FSCN1	HHIPL2	CFAP53
SOX5	CNTNAP2	ST6GALNAC5	ZNF385A	TTYH3	OLR1	SPTBN5
SUGP2	ESPN	IGSF3	MTMR11	EEF1A2	CKLF-CMTM1	PDE6B
PRKD2	OS9	HERC2	CARD10	NPC2	CMTM1	CATSPERZ
DAB2IP	TMTC4	VPS13D	ICAM2	LSM14B	CLDN7	SUN5
BRAF	BLOC1S5	PRKCB	NQO1	PRPF38B	PAQR9	IFT52
UBN1	WDR73	BICD1	DDIAS	TMPO	B3GALT2	CXADR
RAPGEF1	SUGCT	INA	MAPK15	TPR	CREB3L3	PLA2G10
CARD11	DTWD2	ARFGEF1	CHCHD5	HSPD1	EXD1	TUBB4A
COL6A1	GPR39	NKTR	GALK1	EIF2S2	NKX2-1	TPPP2
KIF5A	NOXA1	NOVA1	ABCA8	EHD4	TSGA13	B9D2
TMEM131	SERPINB8	UNC13C	PABPC3	PSMD2	C5orf49	TTLL7
NAV2	WDR76	LARP4	CD247	RPS3A	FGF5	ENKUR
FAT3	PCSK1	APBB1	OAS3	LTA4H	KSR2	ACRBP
SVEP1	AVEN	BTBD9	CYP2C8	SPTB	GSTO2	RP1
SMU1	LRRC15	FUT8	FAM71F2	TOP1	MIA	PDZD7
CTIF	CXCL6	SOX11	CASP10	PSMC6	PZP	UMOD
WBP11	IQCA1	SYT16	PARP9	MINOS1	KIAA1324	PDE6G
ITPKB	RARRES1	SCAMP1	CDK1	KIAA0100	CSF3R	WBP2NL
CTCF	KIR2DL3	SH3RF3	ABHD11	MYOZ2	TDO2	NOTCH3
LIN54	ARL13B	DYNC1I2	BTNL9	KLHDC3	POU3F1	NOTCH4
ENAH	LAMP5	DAPK1	FHL3	SFRP1	BAALC	NRARP
JADE2	ETV2	PHF20L1	CPAMD8	HSPE1	ZNF575	JAG2
UNK	ARHGAP28	FOCAD	IMPA2	ZNF207	HTR2A	DLL3
FURIN	CYB5R4	FTL	DIRAS3	AP2M1	WDR93	DLL1
RFWD2	ZNF467	PRPF8	TRAF3IP2	RPS10	NNMT	DLK2
STAT5A	GSTO2	RYR3	ARID5A	NUCKS1	FAM89A	DNER
COPB1	SLC22A8	RFWD2	MPV17L2	JUP	FAM187B	DLL4
FOXP2	IL3	SYT14	COL13A1	RPL14	IGSF5	SNED1
APC2	TRIM69	TRIM44	RHOG	PDIA6	EPS8L2	DLK1
FLNC	NUP107	BRINP3	RGS14	FH	NKAIN2	SUSD5
CELSR1	ROGDI	YWHAH	MSRB1	TIMP3	CCR2	CNTN6
CELSR2	COMMD2	BNIP3L	OXTR	ZC3H11A	SERPINI1	RFNG
HNRNPH1	ZC2HC1B	THSD7A	SLC25A18	CCT4	CD79A	EGFL7
UTP15	SLC22A15	TBCK	TMEM220	BAZ1B	CTRL	TSPAN15
SLC6A1	FAM187B	SENP7	PTCD1	NDUFAB1	MCTP1	TSPAN14
EBF3	RCBTB2	VPS41	ENPEP	PSMB4	NR4A3	TSPAN5
PPP2R5D	TGDS	BCL11A	RHBDF1	CALD1	SLC16A11	NEPRO
ANAPC2	ARMC2	SETD2	HARBI1	WLS	WISP3	RITA1
SNAP91	CD276	LRPPRC	CDC25A	TSPAN9	GUCA1A	GALNT11
BTBD11	CHST6	ATP2B2	SLC50A1	NCAPD2	CERS3	LFNG
CYLD	FCRLA	PPP1R12A	NKD2	NID2	GOLGA7B	SLC35C1
ATF7IP	SPIRE2	FEM1B	CTSS	TPM4	TTC25	MFNG
UBN2	HOXC12	FSD1L	CLUL1	DDX21	C9orf43	ARRDC1
FAM193A	SMPDL3B	ZNF385B	TMEM99	ANAPC13	CARD11	CHAC1
COG3	ATP6V1B1	SPTBN2	LRRC56	STIP1	IGLON5	AAK1
VAV1	RSPH9	PPIP5K2	SLC10A4	PARK7	ITGB8	APH1B
KIAA1468	PTGES2	RBM39	SLC24A1	LARP1	CRABP2	POGLUT1
ARFGEF2	CIB3	SLC44A1	FNTB	HP1BP3	RASSF9	GDPD5
CAD	CCDC155	AGPAT4	SLC32A1	DNMT1	SLC39A4	BEND6
DOPEY1	SCLY	CDK5R1	ARPC1B	GRN	KCTD14	DTX1
RCOR1	HYLS1	SRGAP2	SLC6A20	RPL7A	TBX4	SLC35C2
SUFU	IDI2	FAF1	ZIC2	NAV1	TEKT1	EPN2
RUVBL2	SSX2IP	BCLAF1	EPHA8	PTBP1	MAB21L3	MAML2
MDM4	MON1A	U2SURP	FAM124B	UCP2	HTR1B	GAS2
TIAL1	ZNF568	NETO2	TIGD4	NUDT3	PTAFR	POFUT1
SFPQ	TCTE3	CHD6	CENPK	ILF3	BHLHA15	APH1A
EFEMP1	RDH12	KIF5B	CHRAC1	ATP5H	UNC5D	ROBO2
GGA1	TMPRSS5	KCNC2	PERP	FRAS1	KCNH3	GATA5
ZNF516	DIRC2	SLAIN1	MYOZ3	MMD	SLC22A14	CBFA2T2
NCL	PPP4R4	ROCK2	TMC1	BRD4	CNTN6	HIF1AN
ZER1	PPM1J	MAP6	ZNF366	ACTR3	FAM178B	PSENEN
ATN1	ATP2A3	ZFAND5	FSTL3	MANF	CCKAR	PRAG1
PITPNM3	TRABD2A	TBC1D5	CLDN16	ACAT1	ISL1	ENHO
ZNF512B	C16orf62	ABR	DTL	TXNIP	TEX15	RCAN2
SF3B2	RASEF	ARHGAP20	KCNQ1	SF3B1	SLC25A18	WDR12
RORB	EIF2D	SUPT3H	SMKR1	RPS14	ZNF471	DTX4
NLK	ATPAF2	ZYG11B	SP9	SKI	TCP11	CDH6
DPYSL5	ST7L	KDM1A	PWP2	ETFB	CCNA1	CFD
TIPARP	RNF135	RIMKLB	MYH15	AGPAT1	KLRG2	DTX2
ZBTB4	ARRDC2	PPP2R1A	SLCO4C1	RBM25	APOBR	GMDS
MAPKAP1	AIM2	RPS3	ADAMTS14	RAB14	SARM1	DTX3
EXOC5	CPT1C	ATXN7L3B	ZNF703	SAFB	ZNF551	MESP1
IREB2	PLEKHA8	STX7	SLC2A4RG	OCIAD1	EFNA3	ROBO1
MAST3	LYG2	UBE2D3	DTX2	NR2F2	EFNA3	LLGL1
GABBR1	NLRP11	WDR7	DSG2	SETD5	GNA15	LLGL2
ISY1	DDI1	RABEP1	FRMPD2	MYLK3	COL5A3	MAML1
CDH11	WDR6	RBM26	CATSPERB	ARHGEF7	CACNA1S	GSX2
PLK2	PFKFB4	PLCL2	GLB1L3	CUL7	VIL1	MIB2
ARHGAP30	MKKS	MGA	IGF2	TIE1	PMAIP1	NRIP2
AGO4	ZUFSP	TTC37	RPP25L	PARP1	ANKRD53	MAML3
IPO9	ARHGAP11A	NDRG4	PLCG2	RPL24	PTPN22	S1PR3
SMC2	C4orf22	UBQLN1	ZNF843	PTP4A3	ARHGEF19	KRT19
USP3	C8orf33	FAM49B	PCOLCE2	PPIG	SNTG2	XIRP1
KPNA4	POLG	RSF1	RASD2	G3BP2	SOX30	NUMB
HCN1	KANK4	PIK3R1	TFAP2E	ANK3	SLC18A1	DLX2
ZDHHC17	RRH	DMXL1	GSTM5	GNAQ	ROPN1L	ZMIZ1
HCFC2	KHK	ETNK1	CYBA	PNN	OVOL1	MMP14
DLGAP2	C17orf78	OPA1	SSPN	PUF60	CMTM5	OVOL2
SEMA3F	AMZ2	RPL30	SMN2	NDUFB2	BDNF	ASCL1
REV1	MRPL44	PKM	DFNB59	POLR2F	FGF10	HEY1
CACNA2D1	NPSR1	FNDC3A	ZNF385C	RBM5	CRYBB1	NFKBIA
TOP2B	TMEM132A	XYLT1	LRRC69	NUDT4	CD14	EYA1
UBXN7	CRYZL1	MLLT11	NIPAL1	CIC	ZBTB32	PDCD10
SLC17A7	FAM200B	TNRC6A	FBXO10	UBR4	ASB17	DLX1
PPP3CA	PKDREJ	RPS19	PLEKHH3	KHDRBS1	SCN3B	HES7
PRKCE	C11orf80	WASF1	FCHSD1	COL6A2	KCTD16	TIMP4
STAT5B	CHST4	CNTN5	ARMC3	NME1	HOXD4	MEGF10
ARHGAP44	SPATA20	FBXO11	MMRN1	SPON1	GPNMB	PGAM2
ARHGAP23	ZNF33A	ADAR	PROM2	PSMD1	UPP2	PERP
EIF4A1	ZNF793	PCDH10	MDFI	GOLGA4	SCGB3A1	TMEM100
PSMD11	NECAP2	SYT13	HIST1H4K	PRDX6	SULT6B1	SEL1L
FBRS	C10orf71	USP15	CLEC14A	FKBP4	EXPH5	NEUROD4
MTF2	PTGES3L-AARSD1	ANKRD50	PSTPIP2	SKP1	LY6G6D	ANXA4
STIP1	DCLRE1A	PITPNC1	ASAH2	GSN	PTPRQ	RIPPLY2
SORT1	PPID	EDIL3	FAM78A	MAPKAPK2	NAIP	CNTN1
RNF111	TSFM	NDFIP1	SLC44A3	SEC61A1	DNAJB7	SORBS2
SRCIN1	SLC26A7	ZNF385D	THNSL2	PSMD4	CD86	PTP4A3
LATS1	MIOS	NNAT	IFIT3	ITGA5	SPATA9	EPN1
MAML2	CENPO	HCN1	NFKBIB	CRIP1	CAPN9	POSTN
RNF40	NARFL	GABRG3	P2RY1	CRIP1	DNAJB13	NCSTN
PTK2	RNF215	RAB3C	MOV10L1	ADNP	NFASC	RBM15
PIAS4	USP16	LUZP2	VWA2	DPM1	ZIC1	ADAM10
ACTR3	C11orf1	SLC4A7	HIST1H4J	EPB41	CCL15	HEY2
GSPT1	ULBP2	LCOR	SOX10	NDUFS7	CCL23	ADAM17
LRRC41	KRTAP10-6	ARNT2	HEATR4	G3BP1	CCDC116	SOX2
SYK	CRISPLD1	UBE2E2	PRX	KTN1	TUBA3D	HES5
PDE10A	ZC2HC1C	WSB2	POLE2	GATA6	CACNA2D3	YAP1
DNAJC6	FAM173B	NWD2	MAGEL2	COPS6	SLC13A5	HP
JAKMIP1	IQCD	ME3	ITGB2	GNG5	LTB4R	FAT4
KDM7A	ITGBL1	ENO2	FLT4	H2AFZ	SERINC2	IFT74
EIF4A3	DGKQ	AP2B1	PTH2R	HNRNPC	BANK1	HOXD3
PSMC2	PPIL6	NNT	LGR5	NSD1	EBI3	MIB1
DAZAP1	RCVRN	TRIM33	LAYN	TMEM2	WDR72	GRIP2
PRKAR1A	KIAA1456	CEP350	USP2	REEP5	ABCA6	IL2RA
RORC	PPIL4	RASSF2	GUCA1B	BCLAF1	BFSP2	MESP2
ZNF800	CCDC97	CACNA1B	NLRX1	DRAP1	RNF112	NLE1
DPF2	FANK1	LDHB	TMIE	NPEPPS	RASL10A	HES3
KLHL2	SLC15A5	SENP6	ZNF223	ARGLU1	SOWAHA	AGXT
PRKCG	ABHD3	CAMKV	MBOAT1	IMMT	OAZ3	SNAI1
EVI5L	METTL2B	LPGAT1	ZNF442	KDM6B	HR	SYNJ2BP
WDR48	CRY1	HMGB1	OLFML2A	KCNK3	ZMAT4	ARRB1
MORC3	FTL	FEZ1	SWI5	TNKS2	CLDN18	HES1
RAPH1	ZNF506	ZFR	RAB32	POLR2M	JPH3	BMP7
FMNL1	ANAPC5	DENND5B	ZFPM1	NUMA1	PLLP	ITGB1BP1
THBS1	DHX32	DNAJA1	SSH3	NME1-NME2	CASS4	BCL6
CAMSAP1	CLYBL	PPP6R3	SLCO2A1	RNPS1	ATP6V1C2	WNT1
TP53BP1	OGFOD3	SLC24A2	LTBP2	UBAP2	EPCAM	GATA2
BOD1L1	SLU7	PRRC2C	PTPRQ	RAB2A	ABCA12	SREBF2
RPL4	METTL13	FOXN3	CNGA3	MAPK1	CHD5	CDK6
PSMD12	IL12RB2	RPL23	KLF15	MLF1	KRT15	ANGPT4
PDZD8	MSTO1	SRSF11	GPR149	MYH7B	DBH	ETV2
KCNH4	ORC3	ATP2A2	PIP5KL1	CSNK2A1	ACBD7	TRAF7
SOX6	TRAF3IP2	KCTD12	TIGD3	PICALM	SULT4A1	ONECUT1
FGFR1	ZNF334	SMCHD1	TMEM204	KMT2E	EPSTI1	NCOR2
MAML3	USP4	HNRNPA2B1	HTR5A	PHACTR2	NOS1	HEYL
AGAP1	WDR70	ST6GAL2	WIF1	WDR26	SHISA7	ATOH1
RARB	FAM71E2	ANKRD12	CXCL13	DENND5A	SYT5	DTX3L
ZBTB47	SLC17A4	PTMA	CORIN	RBM20	OPTC	NR0B2
ZNF131	SDR42E1	HDLBP	CYR61	ACAA2	SLITRK3	PLN
MAPK8IP1	WDR31	DMTF1	ROR2	SLC38A4	C6orf118	GOT1
EIF3D	THUMPD2	VEZT	ADAMTS15	GYS1	PLEKHG6	TBX2
UNC5A	NEIL3	APBA2	FOXC1	CHD3	PRKG2	RPS19
LRP8	TDRP	UBE2E3	GCK	DCAF8	HOXA2	NOD2
FLT1	ASS1	CCDC14	HES5	DCAF8	PRAP1	STAT3
ZNFX1	PTPN18	GNPTAB	FRAT1	TM9SF3	CLEC12B	FGF10
AKAP6	CCDC183	ZMYM4	HOMER3	PSMB5	NDST3	FOXA2
PTPRS	JMJD4	CPEB4	PARP12	FBLN1	CPA3	SNW1
CPSF6	NYNRIN	PDE1C	AVIL	UBE2B	DAB1	HNF1B
CDK19	GDAP2	RAB6A	KL	S100A11	MYH14	KCNA5
DLL4	SPAG1	SORCS3	ZNF492	TSPAN3	TMEM196	CEBPA
BRSK1	GALNT6	DIP2B	PARS2	RPS27A	ODF3B	SRC
KDR	CCDC88B	HNRNPR	CD96	SSRP1	GNA14	TGFB2
HECW1	SPATA32	DENND1A	MKX	CDC37	TMEM88B	FBXW7
CYTH1	EBNA1BP2	FAM110B	C1QTNF2	DLD	HPCAL4	CDKN1B
RBM17	GPBAR1	SECISBP2L	ITPRIPL1	POSTN	SP100	HHEX
MDM2	PLEKHG2	SLC38A2	CYP27C1	PSMB2	CD84	SNAI2
CNOT2	COMP	TMBIM6	SPON2	MTCH1	NTRK3	TGFBR2
RSPRY1	PUS7	CCNY	TMEM51	RRP1	NANOG	BMP2
NFKBIZ	AP4B1	KCTD16	HIST1H2AH	MTUS1	MOGAT2	RASGRP2
RBBP5	ATL3	SYN3	ASPRV1	RPS21	CLDN3	RASL10A
RBM39	N4BP2L2	NRIP1	TMEM81	MYO1C	LARP6	RASL12
TPX2	AP5M1	CLSTN1	LSMEM1	AMOTL1	CABP1	RASSF7
TCF4	TMTC1	GALNT13	MVP	CCNA2	CNGB1	RASGRP1
ZMIZ2	WIF1	DDB1	TFEB	DPYSL2	SIGLEC1	RASA2
EWSR1	MMP21	ATCAY	UCP3	STUB1	SIGLEC9	RASA1
EIF5B	EXT2	C2CD5	GDF10	MTUS2	SIGLEC7	RASAL2
NCOA1	VEGFB	ILF3	LRRC10B	ETF1	SIGLEC8	RASA3
TEAD1	UGT1A3	DYNC1LI2	RASSF5	TRIM63	SIGLEC12	RASAL3
CCNK	UGT1A8	RGS17	MYO3A	PAFAH1B1	CFTR	RASL10B
SCARF2	STX10	TPR	RPL41	ZC3H7B	ARHGEF33	RASGEF1B
PDE4D	CA9	DNER	VGLL3	DLK1	AK7	RASD2
UBE3A	ZNF37A	GPATCH2L	ULBP2	STK39	UNC79	RASGRF1
POLR1A	HAUS3	PRMT2	FAP	KLC1	AASS	RASSF4
TRAF2	TFR2	IPO5	CENPU	SLC25A11	HCST	RASIP1
HNRNPUL2	OLFML2A	CHST11	VWA3A	TAB2	ARNTL2	RASSF2
SAFB2	PRB4	CTIF	SAMD13	GUCY1A3	NECAB2	RASSF1
HELLS	ABCF1	WWOX	PTTG1	BRD3	ZNF804A	RASA4
DDB1	TMCO6	NUDT21	TDRD9	PRDX3	PRIMA1	RASSF5
WDR5	TOR1AIP1	USP33	COLCA1	AKAP13	EPB41L4B	RASL11A
ZNF629	LPL	ACVR2A	CIART	TXNDC5	RASAL3	RASAL1
SENP5	R3HCC1L	CDC42	HIST1H2BO	BANF1	TMEM125	RASGRP4
GIT1	MRPS9	IPO7	HIST1H3G	ETFA	CYP2R1	RASL11B
PIK3R1	MLANA	ATP1B1	SLC22A14	IGF1R	SSUH2	RASSF9
IL6ST	TMPRSS11F	ANKRD28	PROCA1	TMED10	ESPNL	RASSF8
LMTK2	GPAM	NUDCD3	OAF	CTSV	RNF39	RASGEF1A
ARHGAP32	TAF1A	MAP4K3	SLC26A7	PJA2	TMEM130	RASGRF2
DSP	BAIAP2L2	RASA1	KLKB1	RERE	GDF15	RASGRP3
ZNF219	HBB	APLP2	RPS26	PDK1	DNAJC6	RASGEF1C
KCNB1	MPPE1	SETX	ESRRB	THRA	CTSW	RASEF
CSK	LRRN4	FGD4	EPSTI1	SMC3	GPR156	RASSF3
SNX27	STPG1	LRP6	TLR1	GAS6	TMEM255B	RASD1
HNF1B	PTGIS	PDZD2	RHCG	STMN1	OSGIN1	RASSF6
STAU1	GRIK1	ADAM23	SLC10A5	CCNI	SPATA17	RASSF10
EBF2	KLHDC7B	PCSK2	NRM	DAD1	PELI3	RAB26
SEMA6A	TC2N	SCN8A	DOK3	AZIN1	HPCA	YIPF1
DENND1A	NQO1	TOX	AURKA	USP28	FOXJ1	SRGAP1
SLMAP	SPATA4	ZEB1	TACC3	EMILIN2	ARSI	TBC1D1
TAOK2	CNDP1	GOLGB1	INHBB	CSNK1A1L	PNMA1	NTN1
PPP1R9B	TTC14	RC3H2	BUB1	CYB5R3	CLCNKA	RAB24
PAX6	KIAA1257	SNN	POLR3K	UBE2H	CLCNKB	LZTR1
TAOK3	MOAP1	FAM126A	UBA7	TRIP12	DOCK3	RAB11FIP1
NLGN2	LRIG3	RALGAPA1	BCAM	EPHB4	KCNA1	SYTL3
PPP1R16B	WDR86	MON2	DRC1	CGNL1	NELL2	KSR1
NPAS3	CCDC83	ZBTB38	NFATC2	ACTN1	ACAN	DOCK10
MED15	PDZK1	NRXN2	CD44	SREBF2	EPHA5	EVI5L
TRIM9	CDC6	PPP3CB	PI15	PBX1	PRR18	RHOBTB3
WEE1	FADS6	SLC39A10	SULT1C4	RPL7	ALDOB	WASF1
GLYR1	PDIA5	RBBP4	SERPINF1	ARHGAP1	CELSR3	RANBP9
DGCR8	ZXDC	WDR33	CNKSR1	UBE3B	FAM124A	RAB2A
TAF5	TRIM52	MAP2K4	HSPA2	RPL35A	CCDC96	TBC1D10A
CLCN3	LCN2	STT3B	OPLAH	CAPNS1	HRASLS	APOA1
FCHO2	TREML2	RICTOR	KCNJ14	NT5DC2	CNTN4	ARHGEF15
HDAC9	ARHGEF38	RAPGEF5	SERTAD3	SLC38A1	CLEC4A	NISCH
SOBP	ACTR5	FOXP2	DPM3	SARS	SLC41A2	GPR4
ACVR2A	NOB1	ANKRD10	BATF3	TJP1	PTGFR	RIPOR2
TNFAIP3	ANKRD22	CDK19	HPGD	AKAP12	ZC3H12D	SPATA13
EPB41L4B	DAP3	MYEF2	MAFF	PTPN11	PHLDA2	HPS4
KANSL1	SYNGR4	MTPN	B9D2	ZNF106	IL34	BICD2
INTS3	BSCL2	ZNF608	FIBIN	SSPN	SUSD3	VCL
CELF1	IFRD2	GPR161	NEXN	COPZ1	FOXQ1	ERBB2
MEN1	CTRL	KBTBD11	ECHDC3	CERS2	CRYM	PREX1
SALL1	CPS1	DNM1L	SP8	C14orf166	CSMD1	DHCR24
MAP3K7	B3GNT6	SLC22A23	IFFO2	TIMP2	ESRP2	MMD2
CASKIN2	RMND1	ARIH1	MYBPC1	EPO	KCNH6	FOXM1
CRIM1	FILIP1L	RPS2	AGTRAP	GNB2	MAEL	PDPN
ASTN2	CEACAM3	ATRN	MAP3K6	RPL37	SV2C	STAMBP
XPO5	POSTN	NDRG1	USP44	OAZ2	SOD3	EXOC2
GSK3A	HSF4	KLHL29	IFI27	PTGES3	HSF4	RALBP1
SYVN1	RAD51D	KIAA0368	CHADL	KDELR2	HCK	G3BP1
ZFP91	ZFYVE27	CLVS1	STON1-GTF2A1L	ARPC2	SCT	GPR17
FBLN5	OR56B1	CEP85L	TCF19	UBE2I	CACNA1E	RANBP17
ISY1-RAB43	LRRC14B	TBC1D14	METTL23	CASZ1	PITX3	ULK1
MTSS1	AMBN	SYN2	THEMIS2	PSMA6	GCGR	FBXO8
ZNF445	MMP7	MAN2A1	MLYCD	UBE2L3	C2orf81	DENND2A
RFX2	EPRS	ATF2	PIWIL2	GLG1	DLGAP1	DAAM2
SRGAP3	HEMGN	ANKH	TCAP	PFKP	PCDHB7	STXBP6
HECW2	GPR37L1	PPM1A	SYK	IGF2BP1	PIGZ	HACE1
CIT	KLHDC9	CNOT2	NRL	NUDC	SLC9B1	LSM2
FZR1	MRPS10	THRA	DCAF8	NDUFS3	ENTPD2	RHOC
TRIM71	FAM189A2	SMARCAD1	ECM1	DNAJA2	TDRD6	EXOC1
ACVR1B	ENDOV	VCP	FAM131C	STX4	KCNMB2	ARAP3
IQSEC1	DEPDC4	SUGP2	IL7	PRDX1	SCN3A	PKN1
HDAC7	ZNF418	CAMK2D	RRH	NFIC	C16orf54	DENND6A
DOCK2	ASGR2	HDAC2	CUZD1	EIF3B	NTRK2	ARHGEF11
SSBP3	SARS2	FRMD3	ATG9B	LMAN1	SMCO3	SH3BP1
ASH2L	OGDHL	TMEM131	VWDE	PTOV1	LPXN	FER
ACTN2	PODN	APBB2	FBLN5	MAPK8IP3	CHGB	EXOC5
CFLAR	UCP3	RPS14	INAFM1	DCTN1	RHOH	PEX5L
EEF1G	MUC2	EEF1A2	TAF1L	NDUFA7	ADRB2	ARPP19
DYRK1A	TMCO1	ZNF804B	ZNF396	FASTK	44265	CDC42
TTBK1	MFSD9	RPL10A	SIRT4	LSP1	CHAC1	COL3A1
WTAP	KIF22	CCSAP	TMEM63A	PRNP	TEKT5	PDE6D
CTDSPL2	DHDH	MEF2A	PLLP	NOP10	GABRR2	TBC1D13
WWP1	DNAH12	ATP6V1A	IL6R	EPRS	C21orf58	GNA12
CELF2	SLC7A9	B3GAT1	BEST1	ADIPOR1	INSM2	ARHGEF26
ZNF827	IFNK	UBA6	PPP1R3D	EIF5	CCNB1IP1	SPRY1
YLPM1	KRT3	KIAA1549	SEC14L2	CKAP4	ARTN	LRRK2
MLLT3	DCAF13	GALNTL6	SLC7A9	TRA2B	44256	FGD4
DDX6	F13B	WSB1	FKBPL	MKNK2	MILR1	EDNRA
NCDN	RTEL1	HNRNPU	IKZF1	SRP54	GPRIN1	RAB25
DCLK1	RESP18	CPLX2	KCNE4	SLMAP	TMEM56	DENND1B
EPS15L1	SLC4A1AP	FTH1	STKLD1	FAT1	DLEC1	RAB30
ARHGAP29	SIRT5	ENO1	XRCC2	CNIH1	CASP5	BIRC5
PIK3CB	SERPINA11	RPL7A	EDARADD	SUPT5H	LY6K	RTN4
NRXN1	CCDC125	SLCO3A1	MRPL23	LRRC4B	CCDC183	PRKD1
PRPF40B	ANXA7	PODXL2	NUDT17	TRIM35	MYLK2	ARHGEF1
CCNA2	ASL	PTPN11	CRYAB	TMBIM6	CA4	RAB5A
INO80D	ANKEF1	TOMM20	LIPJ	ZMYND11	APOC2	RAB4B
SCFD1	DDO	SHANK2	SCN7A	FOXP1	ELFN2	RAB3C
SNRK	ELOVL2	KCNJ6	LRRK1	SETD7	LRRC55	RAB3B
IRF6	FEM1A	DBN1	ZWINT	TAGLN2	RORB	RAB27A
PTBP1	TYRO3	EIF5	ANKRD20A1	ALKBH5	LRRD1	ABL1
SNW1	FAM166B	N4BP2L2	ATOH8	RAB1B	C8G	CORO1C
HERC4	IL33	TMCC1	SYT10	APRT	RIMS2	IQSEC1
U2AF2	GBP5	CRIM1	DNAJC12	VAPA	SYBU	ROCK2
DCAF8	COASY	MTUS2	TST	UBE4B	COCH	DOK1
CUL3	ECT2	BCAS3	DOCK5	NDUFB4	PTGIR	RB1
NR4A2	MKNK1	GABBR1	LXN	BPTF	GJC2	RABGGTB
NFIA	GLB1	AAK1	KCNJ16	LUC7L3	SELPLG	RAB12
MTMR4	FCRL4	ACSL3	LY6G5C	ALPK2	TRNP1	BICD1
AKT3	SELE	PLXNA1	KIF23	CSNK1D	APOM	VANGL2
RNF220	ZNF831	STOX2	IL17RB	FURIN	SPACA1	GPR35
SAMD4A	P4HA3	BOD1L1	EMILIN1	RAVER1	GFRA4	RAC2
ZNF536	PYHIN1	ZNF84	RRS1	SLC25A12	LSAMP	NTRK1
STRBP	SLC22A3	ZNF451	PRLHR	MAPRE1	NRCAM	CNKSR3
PPP4R1	TREML4	NUAK1	PLB1	DOCK6	C3orf62	CSE1L
MAPKAPK2	CCDC60	MDN1	GLB1L	SRRT	SLAMF9	RAB27B
GATAD2A	INTU	STXBP1	TMEM243	PIEZO1	GPR3	YIPF2
BRD2	PRDX1	RAD21	MYRF	GABPA	MX1	ARF6
LNPEP	LRRC56	KAT6A	SCPEP1	BRD2	HHIP	RAB17
CLOCK	MFNG	H3F3B	TAP1	RPN2	HOXB8	RPH3A
FNIP1	NEK10	PSIP1	DNASE1L2	EZR	P2RX3	IPO13
PHF1	PDZD7	KIF3A	SCN11A	PLVAP	CLDN6	PLCE1
STXBP5	DEPDC1	SLC25A3	COL4A3	RCN1	CHAD	PLK2
THOC1	ALDH6A1	ATP1A3	LACTB2	OAT	HECW1	ARHGEF5
SOS2	HR	ACLY	CDCA5	LAMB2	GPR61	STRIP1
TENM3	ANKRD16	SSH2	SLC26A10	SOX12	FAM184B	PPP2CB
DACH1	KRT28	LYST	GRID2IP	FASN	NPPC	EPHB2
TBX5	TSGA13	ZDHHC21	FMO4	VCAN	TREML2	IPCEF1
G3BP2	NT5C1B-RDH14	TET2	GPR179	NASP	BRSK2	KCTD13
DLG4	SOAT1	PPP1R12B	NDUFB8	DAZAP2	SLC44A4	RCE1
HSPA4	COMMD8	CELF4	IL15	ADPRHL1	ASIC4	RRAD
FAM208A	SLC25A31	LRCH1	RHOF	GANAB	CASP1	RAP2B
PTPN2	PIGT	PRKAR1A	GRASP	PUM2	SLCO1C1	RAP2A
NELL2	SGK494	CDS2	DOK1	AAMP	TEX14	ACAP2
INPP4A	VIPAS39	EVL	CDC42EP1	PRPF4B	GNAT2	BCR
MEIS1	TUBA3D	SSX2IP	TMEM143	KIF13A	GDF5	LPAR1
PLXNA1	FAM114A2	DCHS1	ITGA10	PEX19	SERPINA6	DENND1A
TOX3	ADCYAP1R1	STAG1	KEL	ERBB2	RPRM	TBC1D15
SERBP1	ASTE1	YLPM1	PAPLN	HMGN1	RAB42	AUTS2
TFDP2	UGT3A2	WDR82	LRRIQ3	TCF4	HSF2BP	ARHGAP42
ZRANB2	ST8SIA6	FRRS1L	SYT2	COPS5	TLR6	NGFR
COPS3	KRT40	NECAB1	PRKCD	NDUFC1	KRT1	NF1
NOL4	FBXW12	SCN3B	SCN5A	SSR1	FGF23	ITPKA
ZBTB38	OSCP1	WAC	GDPD3	PNISR	KLF1	MYO9B
FBXW7	BUB1B	MCF2L	SMPD2	TIMM23	MYCL	NGEF
BRD1	CALR3	KIAA1468	CIDEA	IQSEC1	TMEM40	SCAI
RUSC2	SLC2A9	CLCN3	BAMBI	SLC25A23	TFEC	MYCBP2
JPH4	SIRT4	PNISR	EPOR	MICALL1	LRRTM4	NCKAP1L
RELA	SLC17A5	SOS1	GJC2	ADAM10	TNFRSF13B	NKIRAS2
DLC1	HENMT1	DCLK2	KIAA1211L	NDUFS8	MYT1L	SGSM2
DLG5	CYB5R2	SEMA3A	ZNF747	ASPH	SLC47A2	NDRG1
RBM22	CEACAM19	TCF20	ZNF414	FLII	MMP25	IPO7
CSNK1G3	POM121C	TCP1	EGR3	ARHGAP35	FXYD4	FLOT1
SMARCD1	KRT84	ZNF609	CRHR2	SIN3B	FAM131C	DENND5B
CDK17	GFRAL	KANSL1	APBB1IP	MEF2D	GPR176	DBNL
HGF	ASB13	POU2F1	NPFFR1	HAND2	GRID2IP	RAP1A
SHOC2	TMEM214	AKAP12	VIP	SORT1	ASPHD2	SDCBP
PHF19	GUCY2D	APC2	FBXW12	HSPB2	HRCT1	WASF2
POLR1B	CHRNA2	YEATS2	CRNDE	RAB18	C4orf19	RABGEF1
PSMC1	TFB1M	VPS8	HAS2	DBI	MORN3	STK19
ATP5A1	SBF2	DYM	SHROOM1	DAAM1	LIN7B	ARHGDIA
ATP2A2	ARSG	PIK3CA	IFIH1	STT3B	DUOXA2	SAR1A
FBXO41	RNF144B	MKLN1	GLB1L2	CNOT1	TNFSF13B	MICAL3
YTHDF2	POLR1C	NR2C2	ITGA11	SPAG7	PGLYRP1	GBF1
RNF8	OR2T1	ANKRD36B	CSF1	FHL2	SFN	ANKRD27
SF1	YIF1A	VTI1A	KRT10	BTG1	RIPPLY2	RCC1
PAPD5	SLC36A2	AGFG1	SLC17A8	RRM1	HIST1H2BA	RRAGD
MAGI2	KHDC1	DLG1	ZNF763	AHSA1	SLC4A11	GPSM2
NCSTN	JSRP1	KIAA0232	RAB13	RAB8A	ANKS1B	ARHGEF3
NAP1L1	FLNB	MKL2	PLD6	SLC16A3	MMEL1	MRAS
CSNK2A2	ARNTL2	RFX7	GDF9	SSB	MS4A7	KIF14
LMNA	HAO2	ZNF407	PLA2G4A	ATP5G2	C9orf152	GIT1
KPNA6	A1CF	MAST2	SLC19A3	AKAP8	SYT3	MYO5A
SYNCRIP	RMDN1	EPB41L1	CDK2	FKBP9	TREML1	IQGAP3
SPAST	SLC25A10	SUB1	ULBP1	RBM39	CHRNA10	RAB5C
BCL9L	FASTKD3	MEGF9	ETV4	ANKRD17	C5orf47	SBF1
SCUBE3	TMC6	RAB6B	COL8A1	CHD7	ARG2	CYTH3
SFMBT2	CAPN1	THSD7B	NUF2	COPB2	MCOLN3	CYTH2
MEIS2	PCDHB11	ELMOD1	SLC16A4	WBP11	ANKRD55	CYTH1
PPP5C	KIRREL2	KTN1	CTSH	UTRN	CCDC110	RIPOR1
SVOP	TCL1A	ARPP19	FES	IPO9	HOXA1	KANK1
PRKG1	DUS1L	SPRED1	MYLK4	EIF4E2	ELMOD1	STX4
PHC1	DCDC2	ACTR3	SPAG8	CPE	RIMS4	PICALM
LENG8	NTHL1	SOX6	RBM43	ARPC5	PKLR	CCNA2
MBD6	SPARCL1	SMAP1	SELENBP1	RSRC2	NPC1L1	CSF1
LIMK1	NUTM2G	RPL18	CYB5D1	GLYR1	DEFB136	KSR2
ZMIZ1	APOA5	ATM	ZNHIT2	PPP1R12A	LINGO3	PSD
MTMR3	SLC6A7	GDI2	ARHGAP25	DLAT	CACNA1B	DENND4A
PODXL2	KRT6B	ZCCHC11	EFHB	YAP1	SORCS3	EXOC8
BRINP2	KRT4	PDS5A	SPTLC3	UBE2V1	KCNJ14	RIT2
SCAI	HPR	PHKB	TTC6	TNRC6A	C11orf87	RAPGEF6
HNRNPR	ZNF263	FASN	PLA2G7	B2M	PRTN3	SH3BP4
PAPD7	LRMP	PTPRA	SOX7	SERINC1	TSNAXIP1	RHOH
XKR6	TMEM206	ZDHHC17	TBX15	PUM1	IYD	RABL6
ESRP1	CMTR2	RPS5	LYG1	NDRG4	SLC6A15	CDKN1A
AUTS2	GPR18	DYNC2H1	COX7A1	PSMD8	RSPH10B	RAB3IP
NRXN2	HLA-DPB1	PCDH17	USH2A	TNFAIP1	RSPH10B2	RAB36
AGPAT3	GJA10	KDM5A	TTK	SQSTM1	PENK	DVL1
ING3	DPEP3	MICAL3	ZIC5	NSA2	CELF5	ARHGEF7
IGF2BP1	EHHADH	ZCCHC7	CYP4Z1	KLHDC8B	ACOXL	BRK1
SBF1	UGGT1	OLFM3	CCDC81	NUCB1	STEAP1B	DOCK2
NDC1	IGLL5	GOLGA4	ABCB4	DCTN2	STEAP1	PDGFRB
GRID1	GOT1L1	RELN	PLAUR	USMG5	PABPC1L	NUP153
PRPF4	SLC24A5	USP25	PTGS2	ARF3	IFIT3	SH2B2
FUS	APBB3	SNX13	TRABD2A	CACNA1C	PPP1R32	CDH2
LONP1	ERI2	ABHD2	NPY2R	MEX3A	FAM159A	RAB2B
ZBTB44	PRR25	MTMR3	TEX26	TMEM176B	GRID1	RERG
EED	GK2	HTT	TAL1	EIF4G3	PCDHB2	MICALL2
GRAMD1B	DAPK2	PABPC1	HIST1H2BI	ADAM19	ESRP1	PREX2
VPS54	MRPS15	DCTN1	CDKN2C	BZW1	CXCR5	USP33
CCT5	NIPSNAP3B	NYAP2	MTHFS	RPS18	CD27	TBCK
GNL1	FRA10AC1	RAB10	PADI2	XPNPEP1	CCR1	RAB3GAP1
UHRF2	ERMAP	DHX15	RASL12	STAB1	CHST8	KITLG
ADCY5	TTI1	PLK2	TMC6	RBMS2	AK8	RAB14
PHLPP1	KLRC2	TM9SF3	SLC22A10	DST	TTBK1	RAB13
CSNK1E	FHL5	CASC4	EMILIN2	TOMM22	APOL3	RAB10
SNRNP70	ZDHHC1	CLVS2	HIST1H4L	SNX3	APOL4	F2RL3
NCOA5	OPTC	LPP	IL17RC	GON4L	APOL2	F2RL2
LCK	CHRNA10	SLC23A2	BDH2	YY1AP1	APOL1	F2RL1
STXBP5L	CACNA1H	SLC30A9	EFEMP1	TMEM123	SMC1B	RTN4R
COPS5	FAM92B	SDC3	FOXF2	USP47	FCN3	LAT
NRG2	TECTB	PELI2	LRCH4	KIF1B	ANKRD35	ARHGAP1
SARS	TBATA	H2AFV	SARNP	PA2G4	WBP2NL	CHML
TRIM46	PRAMEF2	RNF144A	ANKHD1-EIF4EBP3	DNM1L	FUT2	MICAL1
44446	OR4S2	FBXL5	PRDM6	CCAR1	KIF19	NXT1
DIP2B	44449	RPL34	SAMD9	LSM4	SYNGAP1	FMNL2
HSP90AB1	PGBD1	CNTN3	PHLDB3	ABL1	TEX12	RAB40C
SPOP	SFR1	SPEN	LOX	DAZAP1	SMTNL1	AATK
NRF1	ANXA11	SCN9A	PRRT1	RBPMS2	CYP1B1	ALS2CL
TBC1D10B	PGA5	ACTR1A	GLYCTK	FBN1	TMEM200A	IPO4
MDGA2	TOM1L1	KPNB1	DNAI1	MGRN1	DPCR1	SH3BP5L
TLE1	CPT2	EFNB2	BTBD11	PSMD3	SYT17	RAB11FIP5
AEBP2	FAM124A	NPTN	NRGN	NMT1	NRIP3	RTKN
GNB1	OLAH	RAB2A	CTDNEP1	PARVA	HORMAD2	RAB44
HOMER1	TRAPPC11	UGGT2	ESCO2	TFG	ICOS	PBXIP1
ESR1	TMC7	PPP2R5C	TNFAIP8L3	TIMM13	RNF222	ABL2
AP2M1	NT5C1B	TUB	CISD3	PTPRF	ST8SIA6	EPHA4
UBE2Q1	LRRK1	UBE2K	FAM89A	USP19	CDH23	BICDL1
KCNH3	LRRC66	CLIP2	CRHBP	ABRACL	OLFM2	PSD4
CBLL1	FCAMR	FAM168B	RPS10-NUDT3	CCT7	BRINP2	RALGPS1
YAP1	PQLC3	RBM6	FAM47E-STBD1	PCNA	RBPJL	CDC42EP2
DAAM1	DEPDC1B	ST8SIA2	FHOD1	CKS1B	LGI4	SAR1B
CAMTA2	FDXACB1	KHDRBS1	TPD52L1	ZBED3	B3GNT3	RAB4A
NYAP1	MLPH	POLR2B	SLC26A1	IFITM2	SYNGR3	DIRAS2
DNM1	TMEM8A	DACT1	SNX31	IFITM1	UNC5CL	VPS41
TTYH3	MYO1G	HIPK3	SPRED3	IFITM3	ALDH1A3	GNA13
STK39	C12orf10	EPC1	BCL6B	OXA1L	APOB	XPOT
GRIA2	CRYGA	HSPA12A	CYTIP	SLC38A10	SH2D5	ABI2
SMARCE1	CCR5	GAB2	APOD	CETN3	TP63	DGKI
DAB1	RIN3	FDFT1	E2F7	CTSA	VWA5B2	ARHGEF37
WDTC1	MRPL4	NSMF	ZNF114	TNRC18	ZMYND12	TBC1D9B
ATRNL1	ANXA13	SBNO1	NOL3	ZSWIM8	GPER1	KIF16B
CCNC	ADAP2	SMARCC1	CCDC74B	DPP3	UNC80	RINL
LGI1	HTR3E	FAM135A	HTR4	RALB	SPATA20	TNK1
ZNF644	ZNF782	XRN2	FTCD	CELF2	LY6G5B	PLEKHG2
NCOA6	CP	NUMA1	KLF2	DLC1	MMP21	MICALL1
PPP1CB	NOM1	STK39	NMBR	FYTTD1	DYDC1	AFDN
ASIC2	CEACAM5	KIAA0100	NKAPL	CCNG1	KISS1R	VAV3
XKR4	TMPRSS6	PCMTD1	KDM4D	OST4	MANEAL	ARFGAP1
TPP2	ANGPTL5	ADCYAP1R1	NPIPB11	RAB10	FAM83B	RUSC2
ERBB4	ZSCAN23	KIF26B	FYB	CDK5RAP2	DNAH10	ARFGEF1
HNRNPA1	ZNF354C	ESYT2	ISM1	DYNLRB1	NRN1L	ABRA
ACTR3B	GBP2	HSPA4	MYH14	PFDN2	DLEU7	PKN2
HPN	SSUH2	CDC42BPB	PLEK	LRP1	CD180	RSU1
FAF2	APTX	MAGI3	IFIT1	TMED9	PSMB9	DIRAS1
CSNK1G1	GPC5	MTMR4	B3GALT5	GPX4	CELA1	KALRN
PLRG1	PNLIPRP2	EPRS	SLC35D2	TSC2	ASPG	RAB31
CAMK2G	ARHGAP24	MARK3	ICAM5	LIG1	HGD	MAP3K11
RPS6KA5	ARSK	TROVE2	TYMS	LMAN2	KCNC3	IQGAP2
KLHDC3	PVR	PTPRM	MBLAC1	RCSD1	VGF	NUTF2
PRMT1	CYB5D1	KIAA2026	HAPLN3	NRAP	C1orf228	CAVIN4
ZBTB16	SMPD1	GATS	NOXRED1	MCM4	LAIR1	TRIM67
FAM169A	TRMT10A	UBE2H	ZNF784	EIF3H	LAIR2	RANGAP1
TMEM132D	CYP2R1	LARP1	BTN2A2	ARPC3	XKR4	ALS2
TGFB2	LDHAL6A	KIF3B	MELK	NCSTN	SLC14A1	CYFIP2
TBX18	MTIF2	SLC1A3	SLFN11	ATXN10	GRIA2	NET1
RSRC2	ZNF554	EFR3B	CA3	C19orf53	FAM180A	ARHGAP17
PABPC4	ACAA2	EXOC5	CNN2	CIRBP	SERPINE3	RAB8B
PDE8B	ALG3	FBXW11	MMEL1	PAICS	STMN3	RIMS3
MTPAP	NT5C3B	PURG	COLCA2	TMEM38A	TGM1	RAB38
TAF5L	CCDC28A	NCOA4	FERMT1	ACLY	AQP7	PARD6G
PPME1	DXO	FAM13A	RILPL2	MLLT6	CAPS2	MAPRE2
XRCC6	PRDM5	PTN	ADRA2C	FAM96B	OR5M9	DGKZ
TOPORS	SLC2A5	FAR1	CHEK2	BCKDK	CLHC1	RAB3D
NFIX	TRDMT1	TSPAN3	CPS1	TUBB2A	PRR15L	RIMS4
CCT4	RFWD3	SND1	IZUMO4	RPS2	GAD1	ADGRG1
EXOC8	KRT37	GFOD1	HIST1H1A	EHD2	HOXC4	SYNPO2L
RBFOX2	HEXB	SLITRK5	AMPD3	UBL5	PPP4R4	ANXA2
RAE1	SRI	PEA15	CLEC4A	UBE2R2	PRSS42	PRKCH
RUVBL1	DPEP1	PAPOLA	HAUS8	SEC23A	TLL2	RAPGEF4
NUMBL	CORO2A	SSBP3	RIN3	ACADM	GDNF	RAPGEF3
FBXL17	POR	DKK3	ANKRD35	NEBL	ST8SIA5	RAB19
SKI	ALDH2	TMEM30A	TMEM155	PPP2R5A	WASF3	KNDC1
TBR1	SNX10	MAP4K5	KIF14	CACNA1H	CNTN2	LPAR6
PSMD13	ZNF235	CDH8	PRCD	COPG2	RIMBP3	RABGGTA
GCM1	PIK3R3	ADAM10	ZSCAN1	RBM8A	RIMBP3B	DAB2IP
TM9SF4	C1orf112	44444	LRRC37A	RBM8A	RIMBP3C	RHOQ
HMGXB3	CYP2C18	CACNB2	MRVI1	RRP8	RAB26	ICMT
CPEB1	TMEM156	KIAA0825	ZNF679	NPR3	CNIH3	RAB43
FAM160B1	DBH	FAM120B	FAM109B	PDK2	SYNGR4	NSF
ADCY2	IFT57	TMEM245	SPC24	PLEKHA7	C2CD4C	CDC42SE2
YBX2	PTCHD3	RALGDS	PHKG1	EDNRB	FAM71D	RAB11FIP3
AHSA1	SERPINB10	VAPA	GIMAP5	R3HDM2	PRRT1	RGL1
ACTR2	HAUS5	44441	PLK1	IGSF3	GALNT6	TNPO3
PICALM	PRSS35	RAB11FIP4	EFHD1	TSC22D4	PGPEP1L	FARP1
GRM7	CYP4B1	TJP1	SFTPD	FUBP1	FKBP6	TAX1BP3
STT3B	DPEP2	RPLP2	AAED1	DGKZ	LGALS12	RAB18
SRP54	AHSG	EPB41L5	TCEA3	GSK3B	CNR2	OPTN
FAF1	KNG1	MN1	ABCA12	LRRC59	ABHD16B	DENND1C
DNAJC11	MTHFR	KIAA1217	ARRDC2	DNAJA1	BCL2A1	DENND2D
FAM135A	ENPP5	ELAVL4	SH3TC1	MSL1	PXT1	ARHGEF12
SERPINC1	CDADC1	FXR1	FBF1	DEK	DNAI2	MFN2
ATXN7L3	TPCN2	BTRC	LDLRAP1	SSBP3	SIX2	AKAP13
RIC8B	NDUFAF5	RNGTT	PACSIN3	MSRB3	RAB39A	CTNNAL1
WDR1	MAMDC2	FCHSD2	CTXN3	ZMAT2	FAM69C	RHOV
NR2C2	CPSF1	ICE1	TMEM45A	PDLIM3	PRRT3	VPS4A
MAN1A2	LRRC37A3	PPFIBP1	LURAP1	TBC1D16	TECTA	FGD6
NUFIP2	PLSCR5	CMIP	RCN3	PDIA4	TFAP2A	RHEBL1
CRTC2	OTOA	TULP4	FAM198A	EIF3K	SNAP25	RERGL
MSL1	BNIPL	SUGT1	SPSB2	SLC22A17	CALY	SYNGAP1
B4GALT5	LIPM	NAP1L4	TONSL	TRAP1	CD300LD	CELSR1
ETS2	RTBDN	NCK2	RGS4	USP22	CD300LF	MYRIP
PACSIN1	PARP16	OSBPL6	SMCO2	RPA1	KCNQ3	RANBP2
DPYSL3	TBC1D2	FNIP2	ADORA2B	PRPF19	POU3F3	LRRC59
COPS4	HLA-DOA	RPRD1A	UBTD1	KLHDC10	TYR	RAB11FIP4
LYN	GALNS	GALNT11	FAM229A	EIF3G	CLDN19	RRAS2
ZRANB1	MTRF1L	QSER1	CD4	KANK2	IL17B	TGFBRAP1
JADE1	DNTT	RAB11A	GEM	ENY2	MARVELD3	MLPH
POU2F2	ARHGEF25	PSPC1	GCH1	NDUFA9	OXTR	SYTL1
PAIP1	ZNF792	BTBD10	AVPI1	LARS	PADI4	DIAPH1
PROX1	SLC9A8	SBF1	FABP6	SEC24C	PLS1	NRAS
UBQLN1	DTWD1	TRAPPC9	CIDEB	ACTR1A	GPR88	ANXA9
ATXN7L1	CDH3	CNOT1	KCNA5	KDM2A	PRPH	DENND4B
PTBP2	DTNB	RAPH1	ADAM33	POLR2J	IL21R	ARHGDIB
ELFN1	DSG2	AP1G1	CAPG	SCN5A	SOAT2	EXPH5
ATP1B1	METTL15	ISLR2	UCP2	ZFR	TCF23	MAPKAP1
SMAD4	ATP8B1	ADARB2	ACOT1	DHX15	HNF1A	RIC1
ADD3	C12orf42	LONP2	PLCD3	CSE1L	LHX9	SPRY4
CALD1	SYNPO2L	PI4KA	HEY2	EFTUD2	PSPN	MAP4K4
FBXO38	LIMA1	KLHL24	SLC43A1	AFAP1L1	XDH	RHOT2
FBXW2	NPNT	FADS2	MXRA8	HDAC2	KRTDAP	TIAM1
LEMD3	TRPM6	UNC13A	GIMAP8	MBD6	RAD51AP2	TBC1D2B
PA2G4	AMHR2	EID1	SP140L	TNPO3	MSGN1	RIMS2
TMEM132B	ACRBP	FAM117B	NMB	WBP2	KCNG1	RIMS1
PRPF39	HTR2B	PLXDC2	PPP1R2P3	ZMIZ1	T	RHOD
DLGAP1	SULT1C2	RPS6KC1	COL1A1	PPP2CA	EDN2	RHOF
TTBK2	DECR2	CAMK2B	FBXO17	RHOQ	CAMKV	DOK2
PHF20	TIMD4	MPDZ	DRICH1	44448	PADI3	SOS1
CPSF7	SEMA5B	NDUFS1	ARMC4	PPP1R3C	WFDC2	XPO7
GANAB	TIGD3	FAM208A	C1QC	BRD7	MUC1	RHOG
GRM5	ANKRD1	CSNK1A1	CCDC159	EMP1	TNFAIP8L3	EPS8L2
PAX8	SNX29	SLC25A36	RAMP1	NOSIP	CALML3	FLCN
TOX	SDHA	LRP8	SYDE1	DMPK	SHISA3	RREB1
TRAF3	CDT1	MAP1A	SH3TC2	DOT1L	TAC1	NRG1
GRIA1	FILIP1	PDZRN3	HAPLN2	WDR6	CD28	MYO5B
GDA	TUBB3	KCNK2	ANXA3	ANK1	EFHB	COL1A2
HCN4	HTR3C	GLUL	SLC16A6	HECTD1	ZFP42	RHEB
NTNG2	RNH1	CHD4	C1QB	UQCC2	SLC35D3	STRN3
WIZ	ESPNL	CLIP1	PDLIM1	CCNL2	NOD2	PFN1
NR2E1	OR4C13	DRAXIN	RTP5	CDC42BPB	DLX5	RAB34
HSPA8	SERPIND1	DNAJC5	TUBA8	SAFB2	BMP3	ARHGEF10L
BMPR1B	MFN1	DYRK2	GLIPR1	TOP2B	SLCO4A1	ITPKB
ARHGAP5	FCRLB	ATAD2B	NOS2	GTF3C2	C10orf62	JUN
NFIB	PLA2G6	GMFB	RMI2	SCAF1	CPNE6	RAF1
HMGCR	RAET1L	PAPSS1	TGFB1	ZNF706	LHFPL4	RALGDS
IKZF1	CYP1A2	AASDHPPT	KIF18A	MYL12B	KCNIP4	EXOC4
ENG	NIPAL1	GPRIN1	HBA1	DCBLD2	NGEF	DAPK3
MIER3	RERGL	AFAP1	DNAH12	LOXL2	NLRC5	CDC42BPB
JPH3	SLC38A10	CHD8	NAIP	MTDH	CLEC7A	TBC1D9
KIRREL	RGR	ZBTB44	SLC6A16	CDK1	SLC26A7	RAB11B
OSBP	HSD17B4	ZC3H13	KCNH4	CDIP1	CABP4	PARD6B
FBXL5	TMPRSS2	EPS15	TICRR	IGF2BP3	APOA2	USP6NL
CCT2	OR4C3	FAXC	KLHDC9	ENAH	TLR9	RRAGC
PCSK2	PADI3	CAB39	SCML4	CAP1	TLR9	RGP1
RBPJ	LUZP2	TMEM57	PNMT	CYCS	PSD2	FGD3
RXRA	GAB4	TNPO2	LCP2	MYBBP1A	HIST1H4J	XPO1
UBA2	RSPH6A	NPEPPS	DYDC2	FHOD3	EREG	PLEKHG1
RABEP1	CD5	44262	C1R	ARCN1	CHI3L1	RAP1B
MYO16	TAPBPL	RBM33	COX16	PCM1	GRM4	RANGRF
EPHB1	LRPPRC	ARID4B	TMEM173	MAPK1IP1L	GALR2	SRGAP3
SLC4A8	KCNH8	CBLN2	NNMT	UBFD1	GPR18	DENND2C
MAT2A	KBTBD13	PAFAH1B2	CDHR2	RAB5B	LRFN5	ELMO1
CPEB3	EAPP	RPL22	NLRC5	RPS7	NLRP3	SGSM1
FOXJ2	C14orf28	PTPN13	TRIM38	GOT1	RBFOX3	GOLGA5
CAMK2A	SIDT2	LRRC49	PAGR1	DCAF7	KCNU1	SHOC2
FCHO1	CYP4V2	TNKS2	PCK2	PPP6R1	MAPK8IP2	TBC1D20
SRGAP1	ACOX2	PPP2R5E	FGFR4	RPL36	PTPRT	PARD6A
CELF5	ZCCHC4	DSTN	TNFSF4	EPB41L2	NME9	RHOA
RBM14	ANKRD42	RNF180	IRF7	RPL18	ADAMTS18	IGF1
ZNF384	RBM45	CUL3	GBP4	RAB11B	CHRNA5	HRAS
ZNF618	CSNK2A3	BBS9	CYP39A1	KPNA6	FRMD3	RHOB
GRIK2	ANKFN1	LARS	ZC2HC1C	TRRAP	UGT8	IPO5
ATF7	EIF2B2	TERF2IP	ZNF469	PPP2R5C	TNS4	FGD5
SMAD5	FGF5	HMGN1	PLA2G16	ZFP91	SRRM3	ARHGAP20
PCDH1	NAAA	CDKAL1	RNF135	LAMTOR1	GP5	RAB21
ZC3H12C	GLE1	RPL13A	ACSF2	ANKRD52	TAC3	IQGAP1
PIP4K2B	TDO2	KLHL7	KCNS1	UBXN1	IL1R2	TBC1D8
REL	TMEM134	EPB41L3	TEX14	SMARCE1	FGR	CIB1
ZYG11B	ZYX	RPS6KA2	ENPP6	RTCB	GBP5	RAB1B
PPP4R2	AEN	SHOC2	BTN3A2	MTPN	LIPH	WHAMM
IL21R	NUCB2	SERBP1	SERF1B	HMOX2	TNIP3	NKIRAS1
EIF4A2	SLC16A5	CAP2	NEK2	SBNO1	SCEL	RAB11FIP2
RBL2	AKR7A2	TRIM36	ORAI1	PDCL3	QRFPR	PAK2
PPM1A	CD93	TTBK2	GYS2	PSME1	ITLN1	RIN3
NTRK3	PAPSS2	AKAP13	KIAA1257	SAP18	CASR	SYDE1
AP2B1	FAM213A	HEATR5B	EMILIN3	SDCBP	ANKRD34B	CDC42EP3
GNAL	TYW1	MAST4	GADD45G	DYNC1LI2	C20orf144	RAB22A
CAPZA2	TYW5	SCMH1	TMEM54	BCAS2	STPG1	TIMP2
SIM1	RNASEL	GPBP1	GRAP	ABLIM1	STEAP4	RPH3AL
AP1B1	CCDC181	MTMR9	HTR1E	ZNF516	PIANP	FMNL3
ACHE	TPRG1	LMBR1	SLC27A2	TMEM59	BGLAP	DNMBP
DDX4	RECK	STXBP5L	RINL	CKAP5	KLHDC7A	RAPH1
FKBP8	CYP2B6	PKD1	RIIAD1	ACADVL	TMEM82	CDC42EP5
SOX30	XRCC3	FAM13B	CCDC78	CCT3	NPAS1	TNPO1
GMPS	RASA3	CLK1	MT2A	SREK1	UCP3	TRIO
CBLB	DRAXIN	ABL2	GPNMB	PPP1R3B	KCNIP2	RAB33B
HMGCS1	GMIP	SGMS1	CDKL4	TNPO2	GPR35	INF2
ELL2	ITPRIPL1	KIAA0513	SPATA18	UBTF	IRF4	ECT2
MAPK8	GPR142	STMN3	TPPP3	PSMA1	CYP17A1	NCKAP1
HSPH1	OXA1L	SCAF8	FAM153A	PSMA1	BCAS1	ELMO2
CNOT6L	PINK1	PSMD1	TSSK3	ANTXR2	SPN	RAB7A
ZBTB2	SPAM1	ZKSCAN1	POLR2J2	LCLAT1	FGF17	ABCA1
RAB11FIP3	HSD17B2	DENND4A	VIPR2	PBX2	FOXF1	HPS6
ATAD2	ARMC6	RBPJ	KCNJ5	LIMS3	SP5	OBSCN
DDI2	EPHA8	HSPH1	HYAL1	LIMS3	PNOC	SH3BP5
GPS1	RP1L1	EIF4EBP2	CMKLR1	LIMS3	SLFNL1	NRP1
SCAF1	DNAJC4	SOGA1	ATF3	LIMS1	ARHGEF37	DYNLT1
KPNA1	PCDHB6	PIK3C3	ZNF732	RPS13	FCGBP	FBP1
CELF4	ABHD14A-ACY1	APLP1	FAM83D	CDC23	PLIN5	F2R
RABL6	POLR3G	CSGALNACT1	WNT11	AP2A2	CD79B	DENND4C
NPM1	RNF20	UBL3	TCIRG1	TRAK2	CNNM1	EPO
AGAP2	RABGGTA	SNX7	KIF12	WASF2	OMG	CNKSR1
FADS2	HTR3A	SPHKAP	ERAP2	CELF1	KRT23	DLC1
ZNF865	COL18A1	SLCO5A1	ACOT12	PSIP1	ADAMTS16	DOK3
CORO1C	CTNNAL1	AIG1	CLEC11A	ETS2	SSTR1	GPR65
NFATC3	PPP1R36	WDR70	GPR160	B4GALT1	PPP2R2B	DNM1L
GABPA	SARM1	SPAST	IL1RL2	RPS19	CLEC12A	AP3M1
PPP1R13B	DALRD3	GIGYF2	PCOLCE	TLN2	C1S	ROCK1
PLXNC1	DNAJC15	EIF3A	SLC16A12	PFDN1	SLC22A4	MYOC
BCAR1	TXNDC11	PPIA	PEX11G	NCOR2	XCR1	SOS2
SOCS7	CABP4	DENND5A	TRIP10	RNF207	RDH16	MYO1C
SRSF11	RPUSD1	HLTF	MAEL	C12orf57	NKAIN3	RAB42
HECTD2	MPHOSPH9	AVL9	KCP	ZEB1	C5AR2	NPC1L1
HMBOX1	RAB36	CGGBP1	DLX5	NEDD4L	TREML4	PLEKHG5
MEPCE	NRIP2	SHPRH	XAF1	PBXIP1	C20orf141	ARHGAP44
BACH2	CAT	CCDC91	CTHRC1	SSR2	NALCN	RAB37
RASIP1	MAN2A1	GLG1	LMO1	AP3D1	SAG	RBSN
SESTD1	MTRF1	FBXL7	CPEB1	TOR1AIP2	UBE2U	ARHGEF10
MYC	KIF2B	NFAT5	DHRS4	PRKAA2	BARX2	STMN1
LRP12	DCP1B	GPD2	SHCBP1	CDK11A	MCOLN2	KRAS
PAX5	POLL	RPL8	SP110	RAMP2	UTS2	DVL3
ATP6V0A1	LENG1	SMIM13	SPATA24	VPS25	SCRG1	KPNB1
CCNJ	HEPACAM2	SRRM2	HPSE2	CHMP2A	WDR63	TNPO2
DNAJA2	MOGAT1	ARHGEF11	UQCR11	RAB11FIP5	LRFN2	MAP2K1
KBTBD2	ODF3L1	CCNG2	FAM46C	TSPAN18	CCDC121	ITGA3
ANKRD13C	ECHDC2	KCNJ3	CD53	USP2	SSTR4	CYFIP1
GIT2	UCP2	GARNL3	SPDYA	SFR1	HOXA4	PTH
DPP8	TRIM50	COPA	FZD5	RCN3	C11orf65	CDK2
PAPOLG	KY	HSP90B1	RGS10	MCM2	MOG	RAB40B
LEF1	POLG2	SIK3	MST1R	SHC1	KCNIP1	ADPRHL1
LRRC4	CSF3R	RPL38	PRSS35	AP2S1	FBP1	EGF
TAOK1	STRA6	TSPAN14	FUOM	ABHD4	RNF183	MOBP
RBFOX3	VTN	MBNL1	NFKBID	NTN1	FNDC8	ARHGEF28
SLTM	MAN2A2	SF3B3	NUDT7	GNPAT	SLC35G5	ARHGEF25
BTBD18	ANKRD18B	RAF1	APOB	HNRNPH3	SLC35G3	RHOT1
ZBTB21	TBPL2	RPL35A	CES5A	SPCS1	SLC35G6	EPS8
SSBP2	GALE	CELSR2	FZD9	CFDP1	LRRC15	IPO9
MARK4	MUC3A	EXOC7	ECM2	MAP1LC3A	LRRC34	RIN2
RPL5	SPATA16	PTPRF	MFAP2	VEGFB	C1orf106	RHOJ
POLD3	LIG3	SPIDR	TICAM1	KLHL9	RARRES1	RANBP1
PHF23	POTEC	GABRA2	ESYT3	ORMDL3	ELL3	PIH1D2
BRD7	DDHD2	FOXO3	SYNDIG1L	AMD1	FAM155A	USP50
SOX9	TMEM176B	PPP2R2C	C1QL1	PPP1CC	RET	TNFAIP1
FMN2	SLC35B3	RBM5	HIC1	MRPS21	HENMT1	DOCK7
LIN9	FSCN3	TRIM37	FAM71D	OTUB1	TBX15	RGL3
ARPC2	TRIM58	NCL	GAL3ST1	NBR1	CCDC42	DVL2
DEF6	FCGR1B	ATP13A3	ULBP3	USP13	BTN2A2	BRAF
MKL1	GLS2	SERPINI1	MFNG	EIF4EBP2	BTN2A1	MADD
ITGB8	DDX47	TRIM9	GPR146	LMOD2	HS3ST5	SMCR8
DAPK1	PPP1R21	SLIT2	HLA-DRB1	SPIN1	ETV2	NUP62
NACC1	A3GALT2	HDAC4	ITGA2B	RANGAP1	ATP4A	RAB32
CADM4	CYP2C9	LRRC8B	CRIP3	NCKAP1	ELFN1	RGL2
EVL	IL16	DNAJC13	LAMP5	MBNL2	HLA-DOA	MAPKAPK5
NFE2L1	CCDC74B	SH3GLB1	RGPD3	PPP6R3	FAM196B	HACD3
SWT1	SAMD15	KLHL23	GUCA1A	RSL1D1	CHRNE	HEG1
CSNK1A1	RRP8	IARS	CFAP58	HNRNPR	JAKMIP2	PSD3
SLC6A3	ANGPTL1	MTOR	ADAMTS18	MMP14	SLC30A2	TBC1D17
WASF1	ADAMTS8	ASCC3	NOS3	MRPL15	GABRP	EPS8L3
TMEM57	PPA2	BTAF1	FAH	MRPL54	C2orf88	GPR18
IQGAP1	KDELC2	PAK1	PPP1R42	SF3A1	SLC5A7	VAV1
ZNF654	ARHGEF39	DDX24	LRR1	HMGCS1	SLC17A8	VPS39
DYRK2	NADK	COG5	UHRF1	SMTN	NELL1	DOCK9
ADCY1	LPCAT2	EIF3L	PLEKHG4	C1orf198	PLA2G3	NGF
L3MBTL3	ASB4	ZZZ3	ADAMTS20	CSNK2B	CXCL1	ARHGEF19
RNF2	RASAL3	TMTC1	TBC1D24	NAPA	CXCL3	ELMO3
MNT	CCDC54	TRIM24	IFIT2	ATP6V0A1	CXCL2	CADM4
TRAF6	BTN3A2	HELZ	NGFR	ANAPC11	ICA1L	TMEM127
HNRNPA2B1	FPGT	SETD5	MYO3B	SRP14	C4A	EVI5
EXT1	BSND	UTRN	PRR19	YPEL2	C4B	RABGAP1
TFAP4	COLGALT2	TTC17	SOCS3	NKTR	TEX35	RABGAP1L
TXLNA	WDPCP	ZC3H11A	TMEM133	GLUL	GBGT1	ARHGEF2
FGFR2	GBGT1	ZNF445	CCDC8	NRAS	TACSTD2	RIT1
KCNMA1	UPK3A	MAPK8IP3	DBX2	MED25	KLB	ANKFY1
TSHZ1	ACSBG2	RIMBP2	CD38	SUMO2	FANK1	G3BP2
PPARGC1A	MZF1	PDE7A	SLC7A4	FAM168B	GFAP	RNF41
TP63	FMO4	TCERG1	MYO7A	FZD2	CHL1	GPR55
OGDH	ZBTB40	HERC3	ACSL5	TMED2	LTB4R2	STMN3
IWS1	UBASH3A	RALGAPB	OGN	EID1	TNFSF18	VPS52
FRYL	LRRC6	THRAP3	ITGB3	RAF1	PHLDB3	APOE
PSMD4	ZNF514	LRRTM3	BFSP1	NDN	PTH2	APOC3
FOXO1	ZSCAN29	SLC39A6	IER3	ECHS1	RAB25	RALGAPA2
NXN	SLCO4A1	NUFIP2	DEPDC7	ATF4	VWA2	DENND6B
DDX39B	ADAMTS3	MGLL	PCSK4	UBE2C	NKPD1	FARP2
FRMD5	LIPG	TIAM1	GGT5	TECR	NPY	RANBP10
RFX1	ANKLE2	ENSA	TRH	TXN	UNC93A	CDC42EP4
SLC4A4	PLA2G1B	ZFYVE9	IGSF10	PXN	RDH12	STXBP5L
SP2	PON1	CKB	PRSS27	CRK	MYO7B	DENND3
FRS2	PBXIP1	CDK13	RPRML	RPL22L1	IRAK3	SHTN1
PTK7	MPV17	SGCD	CD84	CYB5B	PRPH2	USP28
HSP90B1	GLYCTK	CSNK1E	ISLR	TRAK1	DKK1	RALGPS2
RXRB	LTB	NFIX	APOL4	CAND1	RBP2	RAB23
PIAS2	CDCP2	HMBOX1	QPRT	BLOC1S1	DMGDH	XPO5
MBD1	FAM83E	PARP8	KCNMB2	NUDCD1	UGT1A6	RALGAPB
RPS6KA4	EMC10	PAM	OAS2	CAMTA1	METTL7B	TBC1D2
KLF4	TBL3	CCT2	BAG3	SH3GLB1	CPNE7	RAB3GAP2
PSME3	C3orf67	LANCL1	TRIM21	PMPCA	NXPH4	CAMK2D
PCGF1	SLC34A2	FAM131B	FER1L5	SEC14L1	IL18R1	KIF3B
PRKAR2B	APMAP	TTL	ZMYND10	DEGS1	ST6GALNAC5	RUNDC1
XPOT	ZNF227	IGF2BP2	TNFRSF10D	SLIRP	AMPD1	SBF2
ZFHX2	TDGF1	ULK2	S100A10	SNRNP200	STX19	EPS8L1
SMARCB1	FMO1	XPO7	C1QA	NES	HAVCR1	RAB5B
GATA6	STYK1	KCNH5	NINJ2	MAP3K12	FCER2	IPO11
MAP2K4	KRT20	EPC2	DLEC1	C5orf24	GALNT14	CDC42EP1
SLC38A2	LMBRD1	GRB2	C5AR1	IFNGR2	HTRA4	RABL3
ADAM23	RDH5	MSI2	KY	TXNDC12	KLKB1	RAPGEF2
MEF2D	ANKRD18A	PAN3	PALM3	C21orf33	GLP1R	DIAPH3
DBN1	STAR	AGBL4	NOG	SORBS1	CYP4F22	RALB
PRR14L	BTNL2	NUP93	GALM	C6orf106	STAC	RALA
ADRM1	CYP26A1	TTC7B	CYTH4	PALM2	TDRD12	CBL
YTHDF3	PIK3C3	POU3F2	FLVCR2	ARHGEF12	TP53TG5	TBC1D16
ST7	C16orf95	ABAT	TBX19	S100A1	CRTAC1	ANLN
EYA3	PRB1	EIF3H	NEFH	ZNF609	SOGA3	CCDC125
RAD21	NOXO1	MVB12B	PTH1R	XPO1	SOGA3	RFXANK
MAPK1	DEPDC7	UBXN7	GPR35	PHYKPL	C11orf94	RAPGEF5
INTS2	AMTN	DTX4	GGT1	GNAO1	CCDC151	CRK
EBF1	GPD2	CREB1	ZNF99	FBXO18	ACSBG1	TBC1D5
SRPK2	MC1R	USP46	UPK2	CHCHD1	C9orf24	NOXA1
CAMKV	C7orf31	CCT3	STRA6	DUSP27	CD160	TBC1D4
TP73	MYBPC3	HIPK2	AOX1	SMARCD3	TGM3	ARHGAP24
KIAA1211L	TMEM71	RUSC2	SH2D4A	IPO7	CHRM1	CHUK
PDZD2	AS3MT	SLC4A8	BUB1B	SYNCRIP	LMO1	SIKE1
FBXO32	FKBPL	ATP1A1	ENPP1	BIRC5	ADAMDEC1	RAB15
PRKAG2	SLC22A31	IPO9	FANK1	UBE2K	SHC3	PHACTR4
SRC	OPRM1	SNRNP200	ZNF600	ARHGAP29	FOXA2	SGSM3
USP1	QRFPR	DZIP3	HIST2H3D	UBE2S	SH2D6	SOD1
FBXL20	TCTE1	KATNAL1	NUAK2	IL6ST	ERVFRD-1	RAB20
NTN1	KLRF2	PRDM2	LRAT	KCTD10	LHB	RAB39A
PHACTR3	GPSM2	OLA1	OTX1	PITPNA	CGB2	CCPG1
CNOT7	HERC5	ASPH	PRDM1	SUPT6H	CGB8	DNM2
HNRNPL	SORL1	CAPZA2	PCDHB14	PFDN5	CGB5	TBC1D22A
TRIM27	SLFN12L	GRAMD1B	DEPDC4	FAM168A	CGB7	ADRB1
SSH2	TAAR2	SCYL2	PCP4L1	RPS27L	OTUD7A	ADRA1A
GRHL2	POLM	POGZ	AGT	PRC1	TACR3	ADRA1B
OLFM1	RSPH4A	LMO7	PGF	ALKBH1	SLC26A8	ARHGEF16
PUF60	PCDHAC1	ARID2	MXD3	DNAJC5	FEZ1	XPO6
THRB	SLC1A7	UBE3C	RAB6C	ARHGEF2	ANXA13	TBC1D10C
SLC44A1	PCDHB1	CACNA1D	ERBB3	NACC1	STXBP5L	SPRY2
CDC27	C2orf80	FOXJ3	PDE4C	PAFAH1B2	HPX	F11R
CREB1	FAM120B	SHC3	CDKN3	CHTOP	PLA2G2C	GDI2
CEP170B	SLC39A5	UQCRC2	PARVG	LPP	FAM71F2	DOCK4
HIC2	AEBP1	FN1	GJA4	COL6A1	MAPK15	RRAS
PSIP1	MFSD10	TMEM181	GSDMD	PRELID1	DDX43	CDC42SE1
KDM1A	RAB11FIP1	ZNF33A	ASIC3	SMG7	KRT79	UNC13D
ACTL6A	NCR1	SP3	CALHM2	RCC2	PDE6G	DENND5A
NRG1	DIXDC1	RBM25	PPP4R4	PHB	PCDHB6	PPP6R1
PTPN4	MCOLN3	MSMO1	DERL3	CPD	FMO4	BICDL2
P4HB	ZWINT	MICU3	SERPINI2	FAM32A	CORO2A	PSD2
PSMC6	UPK1A	FAM208B	STAC2	APH1A	DUSP15	RRAGA
SMAD2	NFE2L3	PSD	EPHA2	GSPT1	GHRL	LPAR2
ARHGAP26	PTCD2	FAM171A1	KIAA0040	ANXA5	FXYD3	FMNL1
SART3	IFT88	EXOC6	LOXHD1	NUTF2	ZNF296	STXBP5
ZBTB18	RAD52	GNAL	TESC	CUL4A	ATP8B4	WDR41
SPPL3	SHC4	KLHL32	SMIM3	SNRPA	WDR27	RAB35
DCTN2	INTS1	MAPK6	ADAM8	PSMC5	FAM83E	RANBP3
TSKS	ARFGAP3	CHD2	RARRES2	KCNH2	GLTPD2	IQSEC3
SIK2	STARD4	CCDC171	DEF6	TAF15	KCNK13	RAPGEF1
PIK3C2B	CDK18	ELF2	TNFSF10	SMC6	KCNRG	AIF1
ILF2	MCM3	FBXL2	FAT2	POLR3H	ANO3	PECAM1
WT1	AKR1C2	ZNF207	ANXA8L1	ITGA6	GRM7	AP1G1
ROR1	TAP2	ZNF706	CHAC2	TRIM44	BHLHE22	MCF2L
RAPGEF6	DPP3	EXOC2	SERPINB1	MARK2	GALNTL6	RAB3IL1
YEATS2	P2RX1	ZMYND8	EXO1	MEF2A	NGB	RAB11A
MTMR12	PGC	SLK	VWA7	NOP58	CCR7	GRB2
TBX21	MAPK13	XRCC6	EGFLAM	NAA11	IMPG2	RAC1
CENPB	PLEKHB2	RALGPS2	ZIC4	TXNL4A	KCNB2	CDH13
CSF1	NDUFS1	WDPCP	HHLA3	STK25	PODNL1	TBC1D10B
SLC8A2	ENDOD1	ERCC6L2	GJD2	F2R	RHBDL2	RAB6A
RAD23B	PCYOX1L	HS3ST5	DPYS	SMTNL2	MAG	RAB1A
DENND4A	LIPH	ASAP2	SCARA5	LAMTOR4	TTLL9	CSDE1
RPL7	TTC34	SIPA1L1	ALDH16A1	CORO1C	NLGN1	RHOU
STK40	NDUFV1	RAD23B	PLGLB2	PDCD6IP	SELP	ARHGEF4
ZNF281	MFSD2B	PPP4R1	ATP2A3	ANLN	C2orf80	RIN1
ZNF496	ITGA2	UBE2N	COLEC10	BMP7	ZNF831	TBC1D14
NOVA1	AOC3	IGSF21	MYCBPAP	FKBP10	GDAP1	RCC2
HNRNPD	TAAR5	LRP12	RSPH4A	SAR1A	UCN	RAB6B
CAMK1D	TRIM40	BRINP1	AOC2	CSNK1G2	ROPN1B	RAP1GAP
LRRC8B	PIGO	ICA1L	DEPDC1	CDKN1B	ROPN1	ARFGEF3
PCBP2	TMPRSS3	HOMER1	PIK3R6	KDM4A	PRDM8	BRAP
LZTS3	PAAF1	RPS9	RFX8	SEC62	TIMP4	SRGAP2
KCNB2	NUDT12	LRFN2	CALML4	ILF2	IL17RB	CYTH4
ADD2	TP53I3	SRSF5	MYLK2	HDAC5	NPW	TIAM2
PDIA3	ZNF829	CDH4	PPP1R17	NPTN	OPALIN	STARD13
EML1	CTSB	RPS13	PPP1R3B	ANGPT1	ADM2	FGD2
TRIP13	MOGS	RPL6	HCK	TMA7	SH2D2A	KANK2
TRIM2	CYP3A4	USP7	MYOCD	NARS	FGF8	DMXL2
PABPC1	RRP12	NLN	FAM43B	SUPT16H	ASIC3	ACTG1
ETF1	CCDC65	MAP3K2	CCR6	ATOX1	S100B	SYNPO2
GABRA2	KIAA1586	SEL1L3	PMFBP1	SLK	CDH7	RPL6
PATZ1	CATSPER4	ORC4	SLITRK6	JMJD8	C16orf96	BMP10
FOXJ3	PLCE1	GALNT18	TP63	SUMO3	SPATA31D1	ANXA5
SET	CCT6B	SV2A	WDR62	JAK1	WNT3	CFL2
PTGS2	CHAT	ZBTB41	SLC16A3	HJURP	HAMP	S100A1
KCNH2	RPAIN	LMTK2	GSTM2	FYCO1	ICAM5	ACTN2
GTF2I	VCPKMT	EWSR1	IGSF5	GATAD2A	SLC28A2	MYL9
HUNK	METTL8	CDK17	TBX3	IRF2BPL	SLC28A1	DST
CBFA2T2	GSTZ1	SIPA1L2	NUDT18	ADCY5	CCDC81	MYH1
SSRP1	PCOLCE2	PHC3	LRRC32	COPB1	LRRC23	PALLD
PACS2	KLHL30	SUPT16H	CREB3L1	UNC5B	HP	BAG3
HERPUD1	IGFALS	FAM213A	TLR5	MAP1LC3B2	HPR	HDAC2
ARNT	SLC25A39	LNX1	LDHAL6A	MEF2C	ANKMY1	FKBP1B
44448	KDELR3	HERC4	PAH	KRTCAP2	GABRA5	TRIM63
NAA15	MMP26	ARID1A	ADRB1	SOGA1	TCTEX1D4	KCNN2
CSNK1D	CD1B	RNF11	LUM	CRAT	KDM4D	MYOZ1
QRICH1	LRP5L	IL17RD	CDKN1A	TEK	KDM4E	ACTN4
CCNL1	POTEH	METTL9	ITGAM	AKAP1	C7	PARVA
SARNP	TOP3A	PTP4A1	ALG1L	NF2	CCDC152	LMAN1
GLUL	ARVCF	TRA2B	SPATA1	QRICH1	ZAP70	NEXN
SLC8A1	SAMSN1	DCUN1D4	IRF8	SRPK2	PRM1	STUB1
SUGP1	TTC23L	CTBP2	TUBA4A	PRR12	PTX4	FBP2
APPBP2	ZNF211	AES	LTB4R	EIF3D	PNMA2	SRF
RBBP4	PADI2	KPNA4	RAB20	DROSHA	FCAMR	ANK2
MCMBP	MMRN2	ZNF24	LEAP2	TRA2A	SPINT1	CSRP1
PLCG2	GALM	CD46	EDN3	ACTR2	SEMA4F	TNNI3
EEF1A2	POTEG	SOCS7	TNFRSF14	GAB1	GAL3ST2	MYH7
RBM15B	RBM23	SMARCA5	SLC1A5	MCM3	C7orf72	MYH6
TMEM108	EFR3A	MTCH1	CLN3	CTBP1	KMO	SMN1
NASP	ITPRIP	HIVEP1	KIF2C	ETFDH	ZNF483	CASQ1
MAP2K7	SHQ1	MYRIP	ADM	NDUFAF2	GPBAR1	MYL2
LRCH1	CA1	RNF19A	CEBPA	AK2	ADORA2B	PPP3CB
NMT1	ULBP3	TRRAP	RNF208	AGL	POU4F1	PPP1R12B
PRICKLE2	VIPR2	PKN2	BAAT	PPP5C	GGT1	PGM1
HNRNPA3	IGSF8	RANBP17	ACE	PPIF	GGTLC1	SCN1A
TTYH1	WDR19	RASA2	PPM1J	SF3B3	GGTLC2	SYNC
TCF7L2	TUT1	CORO1C	GNG8	IRF2BP2	VPREB1	PGM5
PLAG1	OTUB2	STARD7	FGF18	RAD23A	PDCD1	MTMR12
ZNF704	BIN2	SEC62	NRARP	VPS26A	SHH	NOS1
PBX2	A2M	PHF21A	CD300A	OSBP	TRPC7	NBR1
CCT6A	SLC22A7	SCFD2	PEAR1	RBBP6	CDHR3	CAPN9
LSM14B	MCCC2	GRM1	PRR29	BTF3	WDR17	LRRC10
ADAM17	IL17RB	ZMIZ1	SLC25A34	SMYD2	HSD17B1	CACNA1S
PBX1	C17orf53	TGFBR1	RGS1	C1QBP	F2RL1	CACNA1D
TCP1	FAAH	GLIS3	ZNF467	FKBP2	LRG1	ACTN1
MMP14	C1orf131	CPEB3	PTAFR	SLC25A52	GABBR2	FHL3
CNNM2	HSPBAP1	RNF38	OLR1	SLC25A51	STYXL1	EP300
DCAF8	TMEM144	EIF3E	MYBPHL	PTPRK	IL2	MYBPC3
PSMD6	PLA1A	CEP290	TMPRSS7	PSMC4	ANKRD2	TNNI2
ELAVL2	C9orf43	MADD	SERPINB8	ATP11A	ACTL10	MYO18B
LPCAT3	RILP	MAP3K7	PKMYT1	ELAVL1	ARG1	MYOZ2
CDYL	HEXDC	SCG5	NT5C1A	TAX1BP1	ZNF879	DES
CBX2	AP5B1	AMPH	ADCY4	CREBBP	NAPSA	SYNPO
FBXO42	CBLC	FAM135B	PAQR5	EIF3F	DISP2	PDE4B
MICAL3	TMEM207	TOX3	CKS1B	CLU	SLC2A2	PDLIM3
PPARD	BST1	LIN7C	LOXL1	NEO1	ASPHD1	SRI
GMEB2	BROX	RNF165	PRR25	MFAP2	SLURP1	KLHL41
PPP2R2A	SPTLC1	EPN2	OCEL1	STX12	VTN	SPTBN1
PUM2	SERPINA10	FBXO21	BAIAP2L2	SMIM7	VTN	TMOD1
TNFRSF1A	PRSS1	MTMR7	CNBD2	DDX42	SCN1A	TRIM32
PPP6R3	DNALI1	SORT1	PPP1R32	NFAT5	ARL9	LMOD2
RPL7A	TRIT1	B4GALT5	GCSH	CHD2	TLX1	HRC
AZIN1	METTL17	HECTD2	FAM53A	UBE2M	CBLC	JPH2
NR2F1	TRIM64C	CELSR3	LENG9	H2AFV	PLEKHD1	MYL3
ELF2	CCDC59	VOPP1	CKAP2L	EPN1	SFTPB	PDLIM4
RARG	SUSD5	ZNRF2	IFITM10	MOB4	OR51E1	TCAP
MSI2	GOLIM4	CNOT7	HSD17B8	EPB41L3	LRRIQ4	KY
LEPR	GRXCR1	HSPA9	TTC34	FIS1	C1orf64	MYLK3
TRIM39	ARHGAP9	HSBP1	GADD45B	RPL27	GPR20	NOS1AP
RBM15	NEXN	TPM3	TTLL3	FLOT2	ROBO3	TNNT1
CLUH	GSN	MTR	FBXL21	LRPPRC	RTBDN	PDLIM2
AJAP1	PIGB	GFPT1	PROCR	UBR5	S1PR5	ANKRD23
MAP4K5	POLR3D	MEX3A	NGF	HSD17B4	IL2RB	HOMER1
ST18	RCN3	ST7	ANKRD20A3	SHROOM3	CLEC9A	SPTAN1
PPP1R7	THEM5	GRB10	BMP5	ARHGEF17	TMEM236	ARF1
VDAC3	DUS2	SDCCAG8	BTBD17	PARVB	TMEM236	ATP2A1
NFKBIA	N4BP2	SRSF3	CASQ1	AP2B1	ITGAX	SCN3B
DAZL	TRIML1	RPL27A	ROPN1L	DPF2	CPNE9	SYNE2
DDX1	ADAMTSL5	USP32	SCIN	HERC3	SLC52A3	TMOD4
PPP1R37	OTOP3	INSR	NPEPL1	PAF1	TNF	DCTN4
DCC	XPC	SH3BP5	INHA	MGP	CILP	KLHL40
BHLHE40	TRAPPC2L	SRPK1	IGFBP6	POMP	DCST1	MYL12B
ARNTL	TMEM184A	PCCA	JAK3	SMC2	CYP11A1	ANKRD2
BAP1	ZNF383	BAZ1B	DLX2	GPATCH8	QRFP	PDLIM5
NISCH	DNAJC16	CTNNA1	CHST14	AMFR	PLA2G10	LMOD1
IVNS1ABP	PCDHA6	UVRAG	IKBKE	ABCC9	DLX3	PDLIM7
RPL3	FREM2	DCP2	STAG3	CAMK2G	FAM71F1	MYOM3
GTF3C2	MTUS1	CTNND1	TMEM56-RWDD3	RAPGEF1	SOSTDC1	MMP2
TRIM8	CRYBB3	DHCR24	CCDC170	GOLIM4	PDHA2	IGFN1
DCUN1D5	SLC16A13	ATG2B	CHST6	PRKAG2	PIP5KL1	MYOM1
AHCYL1	FCN2	AHCYL2	CCDC110	SLC2A4	WFDC3	ACTN3
KIF5B	PLA2G3	CCT4	RDH13	TAF9	HRK	BIN1
GRIK5	SPDYE1	H2AFY	TMPRSS13	RRM2	REN	TNNI1
KHDRBS1	SPATA5L1	KIAA0319	RBM47	STX16	CRB3	DNAJB6
VEZF1	IL1RL2	PDCD6IP	FOSB	CLK2	SLC16A14	NKX2-5
MKRN1	TROAP	SEL1L	MYCNOS	CTTN	HOXC13	SMTNL1
YTHDF1	ADPRHL1	RUNDC3B	ANKRD7	NUDCD3	ADAM21	SYNE1
DCAF15	TXNRD2	MLLT10	CMTM7	ZWINT	KCNA3	CAV3
CACNG3	WFDC1	SEC31A	REEP6	SAMM50	LIF	CASQ2
FBXO33	CCDC138	LMBRD2	TFEC	TPM3	SPATA21	CAPN3
MFN2	PMPCA	HSD17B12	KCTD4	PET100	C11orf63	CALM3
LINGO1	ERCC3	ZNF678	SYNJ2BP-COX16	STARD7	C15orf48	CALM2
USP10	HSD17B14	LRRTM2	MYH3	TMX4	CD163	CALM1
SLC2A1	OIT3	FRAS1	RRM2	NEK9	C17orf99	FLNC
TMEM259	USP54	FOXG1	GPER1	CDH11	FAT2	PYROXD1
SH3GLB1	CPVL	HNRNPA3	ALDH1A1	CDS2	FBXO41	SLC2A1
ZBTB1	P2RX7	MPZL1	NEURL2	PRDX5	CCL4	JPH1
FYN	GNB3	PARP1	LRMP	DKK3	CCL4L1	PPP1R12A
CHUK	MED24	CCT6A	ARSJ	SIPA1L2	CCL4L2	MYOM2
PKNOX1	ITGAM	CAMKK2	F12	SDF4	HOXC5	RPL17
RELB	MSS51	GNAZ	MATN3	44261	FAM83A	RPL15
ARRB1	UNC45A	SLC12A2	FRRS1	ZNF395	PLA2G12B	ANKRD1
NRIP1	RCCD1	VPS35	HERC5	C6orf62	TEPP	FHL2
DLG1	SUPT3H	RAB14	SPATA22	TIMM44	EPGN	FKBP1A
MEMO1	VRK3	HK1	ZBTB7B	ERF	BPIFB1	PSMA6
ITPK1	TJP2	LPL	SEC14L5	CLTA	GFI1B	TNNC2
BANP	PRAMEF1	KPNA1	PRICKLE4	UBAC2	OAS2	SPHKAP
YY1	MSH5	KIAA1328	SERTAD1	MRPL10	CCT6B	HSPB1
PSMA5	PRSS55	TRAPPC8	NFAM1	DAB2IP	TMEM145	RYR2
STRN4	PLIN1	TMEM170B	SLC25A41	USP5	S1PR4	MYH2
ZCCHC2	OR2AG1	TNRC6C	LLGL2	ABCC5	KCNJ13	FBXO32
DPYSL2	L3MBTL4	SQLE	CYB5R2	MCM5	TSSK1B	NEBL
PDGFC	CENPK	WDR17	ZNF563	SENP6	GRIN1	TMOD2
ARIH2	SULT1A1	GSPT1	MYO1F	VASH2	KLK9	MYPN
TEAD3	IZUMO3	CHN1	LSR	CAMK1	HSPB9	WDR1
SENP1	YARS2	RPAP2	OR2W3	CHD8	AMPH	LRRC39
MSI1	IDH3B	CCNT2	ATP6V0A4	LSM14A	C17orf98	FBXL22
SMAP1	GAL3ST2	PPP2R3A	CD14	APEX1	CLEC5A	JUP
CEPT1	RBPJL	EDEM3	CD163	NAA50	DRAXIN	MYL7
MPPED2	FERMT1	TAX1BP1	STAP2	RAB1A	HLA-DMB	ILK
GABRD	SLCO6A1	GTF2I	TGM1	PDLIM1	HIST1H4B	FOXP1
NKD1	NEIL2	ATP6V0A1	HSPE1-MOB4	SCAMP3	TEX38	GRIN2B
STK11	RABEPK	PDGFC	RGPD2	BICD2	TNFSF10	STK11
MORF4L1	APH1B	CUL5	MOBP	TSPYL1	LHFPL3	CSRP3
FAM193B	DPYS	SMARCA4	CDK18	PPP1R2	TDRD5	KRT8
KCTD16	GTF2A1L	HSPD1	CHRM5	ARL6IP1	CMTM2	KCNE1
TBX2	CNGA1	ST3GAL1	C7	PCNP	TRIM58	MYZAP
RPL6	OASL	CEP192	ZNF19	AEBP1	MORC1	FHL5
FMNL2	GC	XKR6	ZDHHC12	VASH1	TMEM132B	MYOT
FBL	APIP	GALNT2	NLRP14	DYNLT1	LMX1A	MYBPHL
EPB41L2	DBF4B	PIKFYVE	LAMB3	CKB	TNFSF15	TPM1
ULK1	PGLYRP2	ST6GAL1	OIT3	NXF1	LIN28A	TNNT3
E2F7	NUDCD1	IMPAD1	CBS	ZNF664	SCN4B	TNNT2
TRA2B	MERTK	CDC27	NMU	MFF	C8orf34	AHNAK2
CDC42BPA	CPA1	JAK1	U2AF1	POLR2E	MYO1G	GLRX3
RC3H1	ACADSB	TM9SF2	KIFC1	GM2A	BCO2	MYOZ3
GRM4	GLP2R	TBC1D32	CD302	DSG2	F2	XIRP2
NPTN	ATP6V0A2	PAK2	TEX29	RTF1	PLG	SLC4A1
DBF4	TMEM25	PIAS2	MPEG1	UPK3B	ADCY8	ANK1
GRHL3	PRAMEF6	RPS12	PKIB	TMEM201	SYT8	ANK3
SLC7A1	ADH5	CSE1L	TRIM56	PTPN23	ITIH4	SCN8A
SP4	ATP6V0D2	CREBBP	NBPF10	PITPNB	SLC12A3	SCN5A
ZNF319	ZSCAN32	UBA52	LGI3	IRS1	COL28A1	MYL12A
AGFG1	STOML1	SLAIN2	TBX2	OGFR	STYK1	PPP2R5A
WDR18	PBLD	GALNT1	MEOX2	AIF1L	GSTA2	PROX1
CBX8	SLC7A2	SPATS2L	NPIPA5	TMEM181	GSTA1	PDLIM1
SLC39A10	SCGN	DYNLL1	NPHS1	SAMD4B	GSTA5	CACNA1C
CTPS1	ISM2	CALR	ALDH1L1	ISYNA1	GSTA3	HABP4
HSPD1	VWA7	CBX3	LRRC36	ZC3H4	HAAO	NEB
PHF3	ANGPTL4	ITCH	DRAM1	RNF44	ODF3	TRIM54
TESK1	TMEM129	TSPYL1	BCL2L15	ATP1B2	RTP3	NEURL2
CTDSP1	CUZD1	ZC3H7B	LGR6	USP4	HIGD1B	RPL4
CHRM3	NT5E	AGO4	FCGR3A	HIPK1	PEX5L	CRYAB
USF2	RRBP1	SKP1	PLCD4	ANAPC1	OAS3	RPL7
PITPNC1	FBXO27	RNF152	ADPRH	POFUT2	SOX2	SLC8A1
DHX37	RGS3	SLC25A46	ZFP36	FAM198B	EFCAB6	EDN1
CMTR1	RASSF7	BSN	SLC47A1	TGFB2	MANSC4	ACTC1
BRINP1	C11orf49	PACS1	WFDC1	MEA1	DPY19L2	ACTA1
DLGAP4	PRKRIP1	HSPA13	SDC4	NSFL1C	UBAP1L	NRAP
TERF2	PPM1D	LIFR	FAM83F	PTK7	CBLN1	SIX4
PLXNB2	SLC24A4	ZNF254	SPR	CALCOCO1	INSRR	CAB39
CPE	PCDHGA4	EXT2	SKAP1	CCND1	BCL2L15	TMOD3
TLN2	MPP7	JARID2	ANGPTL1	DLGAP4	PTPRR	RYR3
HNRNPH3	PNLIPRP3	USP3	USHBP1	HK2	JAKMIP3	FHOD3
TOMM40	GGT5	FAM189A1	PIH1D2	TCF7L2	PDIA2	TRPC1
RAPGEF4	DUS3L	CUL1	DMC1	SPOP	HIST1H1A	CSRP2
SIPA1L2	ENTPD7	PTPRJ	SH2D5	MYBPHL	PDE6B	RYR1
BHLHE41	AKR1E2	SLC25A12	PSCA	MCM6	PCOLCE2	LMOD3
CDK1	RGSL1	UBE2QL1	ADAMTS4	RPL21	KCNK7	TNNC1
TFAP2D	MIPOL1	ATP11B	PLEKHD1	BUB1B	FGF6	LDB3
RAB11FIP4	SLC12A4	BACH1	CASZ1	RGS3	GRM8	MYL4
MAP7D1	LRIT3	SAMD8	TMEM79	DENR	ATP8B3
CHAMP1	CEP97	ZBTB10	NRG4	MTA2	MOCOS
SKIDA1	LRRC28	FIP1L1	NXNL2	FECH	ELF5
IKBKB	AK8	WWC1	PNPLA1	COPS2	CCT8L2
CUL9	CLEC3A	MICU1	TLL2	LAP3	GLP2R
REST	ZNF573	SH3PXD2A	EYA4	BCL9	ARHGAP15
SF3B4	WDR38	DCTN5	NCAPH	PLXNA4	RASGRF1
CDC23	ZKSCAN3	CHD5	FOLR2	HARS	KLK10
PKNOX2	EVI5	ADK	DLGAP5	CENPF	RNF151
NEGR1	LMAN2L	FCHO2	SOX15	TPP1	PRG2
CRMP1	VLDLR	FAM169A	OTOGL	C1D	HOXC8
CDH2	RFX5	CORO2B	NR1D1	MEIS1	DMRT2
CNTNAP5	LRRC45	PHLPP1	ART3	XPO6	OR10V1
SOX10	ADCY3	ITGB8	CCDC88B	GOLGB1	HOXB6
EDNRA	PIBF1	RANBP9	SERHL2	MDC1	FFAR2
ATP6V1B2	TSTD2	SERGEF	RSPO4	SPEN	ITGB6
KIF3C	ZNF420	TBC1D9	CDCA3	GGA2	KCNMA1
RAB11A	LYPD3	TRAK2	FIBCD1	RGL1	SIX1
C11orf84	IFT43	DLGAP4	MPZL3	ISCA1	GPRC5D
ARNT2	GSTA5	CSRP2	MCM10	SH3GLB2	CHRNA7
CSNK1G2	EXOSC9	BCL2	SFRP2	DUSP3	CHRFAM7A
GMDS	VPS39	SNCA	HEYL	UBXN4	C3orf20
ATF2	IFI16	RAN	IRF1	BIRC6	MS4A4A
AMMECR1L	GTF3A	FAM107B	CKMT2	TUBB6	MUC20
MAPRE1	NAGA	ROCK1	PTPN6	RCAN2	AQP9
TCFL5	FAM83F	TPP2	SLFNL1	EMC1	C2orf74
AHCYL2	PILRA	ATF4	CCDC154	RPS6KA2	CXCL17
RAI14	ZSCAN9	ZNF106	BTN3A3	KIAA1671	DRC1
LMX1A	PLBD2	AGPS	HMOX1	PLK2	LOR
KCNJ3	CTTNBP2	VTA1	CNBD1	BCL9L	C1QL4
ERP44	CFHR3	XPO6	ZC3H12D	SAMD4A	TFR2
DNAJC2	CYP3A43	PACS2	SPTBN5	SAMD4A	LOXL4
KCNN2	ADH1A	RAPGEF1	IQGAP3	PIGT	ADRA2A
DENND4B	CNTNAP3	RPL27	SLC37A2	PRICKLE4	TH
UCHL1	NOP9	IREB2	SYCE1L	WISP1	SLC22A13
TNRC18	UCP1	RC3H1	RIN1	PLEKHG2	KLK13
FAM131B	MALSU1	TSC1	B3GNT7	RAB11A	GDAP1L1
IRF1	GP6	NBEAL1	SLC9A2	PSME3	BCL2L10
TOP2A	MORN1	EXOC1	NHLH2	ERGIC3	TNFRSF11B
ZNF770	CLUL1	PRPF40A	CLDN12	ACOT13	BHMT2
ZBTB10	CTC1	EXTL3	PSMB8	HEY2	LRTM2
GALNT13	TMEM62	WDR26	MYRFL	TCF12	MAATS1
ARID3A	OSGIN1	DCAF6	HSD17B6	RBP1	ECEL1
STIM2	WDR54	SLC16A7	LTBR	BRK1	PRL
CHRM1	VRK2	GPRIN3	IL1R1	PPP2R5D	C6orf10
TSHZ3	BID	AP3S1	TNFRSF11A	FRY	ZIC2
PSAP	FNDC7	TRAK1	KCNK13	DDX23	CBLN2
SATB1	GPATCH1	UBXN2B	ADORA3	BAZ2A	NLRC4
DPF1	MAP4K2	NLK	GYPE	TACC3	TTLL2
RAB14	C4A	ABCC5	BST1	TMEM242	SLC9A3
TERT	SDR39U1	BCR	ZNF806	ARNT	MESP2
GTF2A1	CPT1B	REEP5	AIF1	ACACB	KCNH4
IRS2	LARP1B	OXR1	IGSF22	SLAIN2	GJB5
ERN1	ELSPBP1	SRP9	TMEM144	SEMA6D	CCL20
IRF2BP1	HADHB	MAML3	CERKL	HIBADH	METTL21C
TFAP2B	CDCA2	SOS2	HRH3	CKS2	NEU4
FAM160A2	ADH7	ARL10	ZNF837	SUCLA2	TRPC4
RIMS1	INCA1	ACTR2	SGK3	C11orf95	SLC22A7
PSPC1	ALPPL2	CLMP	MCTP2	UBQLN1	CCL8
HAS2	C1orf127	TOP1	SKA3	CISD1	DSC3
GCLM	DOCK8	ACVR2B	PBK	SLC6A6	TMEM72
DNAJC7	STON1	DCTN2	ATP13A5	TCF3	NCMAP
RBM4	FCRL2	RLF	PPP1R1C	PCCB	ASCL1
TMEM201	TOM1	DZIP1	SMTNL2	SRSF7	SCNN1B
RPS8	MTFR1	SCAI	SSC4D	BOD1L1	TTLL6
ZNF710	SLC25A21	PGBD5	SHD	PITRM1	SCTR
HS6ST3	GPR137B	NDST3	NXPH4	SLC39A1	CHRNA4
PTPRZ1	SNX16	SLC8A3	DRD2	CCDC124	SLPI
U2AF1	ALDH1L1	SYNDIG1	TMEM191C	RAI1	TMEM202
SLC6A6	RRNAD1	CMSS1	ITIH2	C14orf119	PNLIPRP1
SNRPA1	GHRL	N4BP2	CLEC1A	KIF20A	DNASE1L3
GTF2H1	CD96	GATAD2B	CYP2J2	CCDC6	GPHA2
KAT2B	KIFC2	TET3	HPGDS	ROCK2	FSCN3
NR2F2	BTN2A2	STMN4	FZD2	ROCK1	SLC26A5
KCND3	ST6GALNAC1	AHNAK2	UBE2Q2L	DNAJC15	PTHLH
ERF	FSHR	MAPK8IP1	SETD9	PHF3	RNASE1
TFAP2A	KRT72	SUN1	AKR7A3	LEPROT	DCT
GNAO1	HLA-G	RNF24	GRAP2	UHRF1	OTOA
GPM6A	SDSL	ARRB1	LAT2	BAZ2B	CCDC154
ANP32A	IBSP	PPM1K	FAM71E1	GALNT2	APOD
NR5A1	CRELD1	LIN7A	ORC1	AP1B1	AOAH
KCNC1	SLC46A2	ARRDC3	TCP10L	TRAF7	SLIT1
RBM20	HEXA	FARS2	SYT12	PPP1R9B	BHLHA9
UVRAG	NMS	NAALADL2	TTPA	SRP68	GRM6
FLI1	EXOG	LEMD3	FAM111B	MMP2	TBC1D21
ATP13A1	SEC14L4	UST	MPZ	GORASP2	CD300LB
MLXIP	DENND3	LHFPL3	CDCP1	KIAA0141	SLC24A1
ERC2	HPX	CSNK1G3	PRR11	EIF4A3	SLC5A11
PPP2CA	PTPRJ	GMDS	NEK5	TIA1	TRIM66
TRIM3	CA12	TRPC4AP	QRFPR	CWC15	DNAH9
RYK	CLGN	RYBP	RHBDF2	WSB1	PPP1R42
MAP4K1	TMEM45B	RAB3GAP2	CCDC68	MFGE8	ALLC
FIGN	ZNF692	MTDH	GOLGA6L10	YLPM1	STK31
FBXO3	ZYG11A	XRN1	GJA5	BAG3	NSUN7
SLC1A3	PGS1	SLC35F5	APOL6	BVES	TNFRSF9
RAB2A	TTLL10	RHOB	KLHL6	LPGAT1	SLC4A10
TBX3	MASP1	NISCH	PON3	ZRANB2	SPATA25
VRTN	OMA1	SPAG16	RAG1	GRPEL1	LEAP2
SH3PXD2A	SLC6A13	ATL1	COLEC11	ARF5	CLEC6A
ZNF532	PATL2	POGK	CLEC18B	TULP4	AMBP
ZNRF3	SDCCAG8	RAB3GAP1	GCKR	ATP6V1E1	BTBD18
BCL11B	ANKRD6	TAGLN3	CCDC151	CSNK1E	CPB2
MGAT1	ZFAND4	CSNK2A1	MB21D1	SUMO1	GAL3ST1
GNB2	SH3BP2	UGGT1	NLRC3	CHMP4B	STOML3
BCL3	SYTL1	TRIM28	IQCD	AFAP1	CDH9
SOCS6	FEZ2	TAB2	BBOX1	SAE1	TRIM29
FEZF2	C15orf38-AP3S2	HSDL1	ZP3	MRPS7	TFAP2B
NMNAT2	AFP	STRN3	MRPL46	PSMD12	FOXF2
SHE	MS4A10	TMEM167A	FAS	MTSS1L	PKP3
ELAVL1	INTS4	RPS29	CCNE1	CUL1	DPEP2
STAT6	ZSWIM1	ACAP2	ANGPTL5	COX14	EDAR
EFNB2	ALDH9A1	GMPS	CEBPD	INTS3	HEPACAM
TUBB2B	KRT17	MEGF8	CD80	CUX1	TRPM2
SLC40A1	ARSA	MORF4L1	TCTEX1D1	EHBP1	CES5A
GDF6	KIAA1161	CNOT4	SLC43A3	EHMT2	GK2
ADD1	SCNN1A	YTHDC2	DKK1	SLC20A2	CDH15
C18orf8	LANCL1	PREX2	LAMB4	MCL1	CD6
LHX2	FAM81B	GOPC	C4A	SPARCL1	SYT15
MEGF9	SEC23A	PSME4	ERVMER34-1	DDX46	ACER1
LATS2	GRSF1	ATXN7L1	SH2D6	ZNF827	CSF3
FOXO3	PRSS48	UBR1	SLC22A18	ATXN2	GPR75
CDH8	SLC26A1	DNAJC10	P2RY13	MAST4	SCN11A
SMAD1	PLIN5	CPEB2	POPDC3	TACC2	BAAT
RCOR3	ENTPD8	KLHDC10	GRTP1	ARPC1B	SLC10A4
BMP2	PRAMEF4	COL4A3BP	KIF20A	PRKCSH	ADRA1A
GJC1	GPATCH2	BRD2	LPA	LTBP1	CCIN
PPP1R8	FAM167A	LSS	GCHFR	FTO	INS
PGD	TSEN2	MYO1D	EFCC1	SNX17	GPR158
C9orf172	EMB	MAML2	ADGB	TWSG1	PADI1
E2F1	CATSPER1	DCTN4	OTOF	PLEKHO1	KCNS3
LOX	NLRC4	SARS	TIMP4	CDCA3	CCDC13
PSMA7	DHRS7	FKBP8	MARVELD2	ANGPTL2	DGKB
ZBTB43	DGCR6	BMPR1A	PLD4	DNAJC8	GUCA2B
STX1B	LIPE	PIAS1	PDYN	PCYT1A	GCSAM
ATP6V0D1	PCDHB15	WDR48	RFESD	RAB5C	PLCH2
BCR	C2CD5	DCAF7	TAPBPL	KAT6A	WNT6
SAE1	TRIM37	GPD1L	DPEP1	MAST2	DUOX1
EIF5	ZNF169	SEMA6A	FAM47E	TP53	CCL11
PPM1E	CRAT	ZFP90	TMEM100	MT1A	SLC35F4
GOLGA2	ATP4A	PRR14L	SLC7A7	PCP4L1	MAK
SF3A1	POMT2	ERI3	KCNE3	KARS	CMA1
LSAMP	GOLGB1	UBN2	FERMT3	FNDC3B	DEFB129
WNT5A	MYLK	ATP6V1B2	RDH16	TOMM20	C10orf128
PRLR	PDK4	RHOBTB3	SLC22A1	IP6K1	LRRC7
IKZF2	IFT81	SNRK	AKAP3	ADRM1	RASGRP1
TGFB3	ADSL	KDM3B	MSX1	BNIP3L	HCRTR2
MYO18A	CHL1	PYGB	GPR83	PAK2	CBY3
C2CD2L	KCNJ16	VGLL4	MFSD2B	CLINT1	GLIS1
SCHIP1	SNX19	SEZ6	CFI	RASIP1	UBASH3A
ARRDC3	SH3D21	TMEM132A	YBX2	TNNI2	CCL18
CSNK2A1	PCTP	KIF16B	NPAP1	TRIOBP	CCL3
DPP9	PRCP	DIXDC1	SELPLG	NARF	CCL3L3
MEF2A	ALS2	SLC41A2	HS3ST3A1	TSHZ1	CCL3L1
PHF21B	NELL1	ESRRG	MTTP	LYPLA1	NHLRC4
PYGO1	DDX51	GPR85	CARD6	UBE2Z	C9orf153
NAA30	AMY2A	GTF3C1	POPDC2	SYNE2	GRIK1
FBXO28	TRIM4	LASP1	FAM86C1	ELK3	HKDC1
SEC61A1	DNAAF1	ATE1	EPS8L1	SYNPO2	PLXDC1
FAM168A	ARHGAP18	DIDO1	NEIL3	GIGYF1	CCDC87
RAB3GAP2	ZNF615	ZNF124	ECEL1	EML2	S100A3
MLLT1	DGAT2	RPS27A	PPIC	ZMYND8	LY9
COPS6	PLEC	ACIN1	PTGDR2	SLC44A2	AGMO
CCND2	ASAP3	EIF1	CASS4	AKAP9	SLC46A2
SNAP25	SORBS3	SCLT1	PRELP	SCAF11	ISX
MALT1	TNK2	ZBTB37	GTSE1	ATP2B1	CCR3
AP3D1	TPSD1	TSPYL4	PTGES	MTFR1L	EN1
REXO1	TMEM232	MIA3	PKN3	GLS	NCAM2
OPA1	CCDC39	ZC3H14	PODN	RPL29	SPEF2
REEP1	MFSD3	IBTK	TRIM17	UPF1	ALDH3A1
ANTXR1	SIAE	RPL29	SLC16A5	OPA1	ACPP
MRTO4	SLC15A3	TRPC1	DDX4	SIPA1L1	LINGO2
UBE2K	C17orf74	LRBA	ACTRT3	GALNT1	CRTAM
PSMA6	LRRC36	OXCT1	P2RY14	RACGAP1	ZP2
KIAA1549	TMEM255B	PDP1	DGCR6	ATP6V0B	BNIPL
PPAT	FAM47E-STBD1	BTBD1	AKNAD1	RHOT2	BEST2
RDH10	NSMAF	CA10	CES3	EGLN1	GDA
RTN1	MYOC	NCDN	SPHK1	XPO7	SMCO1
PPP1CA	FCER2	GBF1	CORO6	TOMM40	VMO1
NRP1	ZNHIT6	GOLM1	VSIG10L	NOMO3	ZFYVE28
NUDT21	HACL1	EFR3A	NDC80	NOMO2	SPAG6
SYNPO	NUDT1	RAD50	RELB	NOMO1	CFC1B
ACTB	TEKT2	UBR2	NUTM2A	PNRC2	CFC1
CPEB4	SLC30A8	DOPEY2	WDR92	PNRC2	ZP1
CYP46A1	ANKK1	CIRBP	SLC24A4	NCS1	RSPH6A
GMEB1	ATG7	NECAP1	SLC13A5	VDAC3	CRYGC
BAHD1	UPB1	CACNA1A	ANKRD20A2	AFG3L2	HSF5
EIF3G	EXTL1	CCT5	CASP4	AARS	PLA2G1B
TARDBP	NID1	BCL11B	H3F3C	ALAD	ALDH3B2
ELL	KRT73	OCIAD1	GNMT	SNN	C4orf36
PTGES3	LRBA	CDK5RAP2	ARHGEF15	POLR1D	BTBD16
MAP3K3	SRFBP1	CCT7	ANGPTL4	SUCLG2	LMAN1L
SLC30A1	C16orf59	AKAP7	ERICH5	ATP6V1F	LRRC6
KLHL29	C8orf74	TRIM67	HYKK	MGEA5	HCRTR1
CALCRL	PCDHB4	ATP6V0E2	CNGA4	MAGOH	IL17F
YIPF5	TRIM66	MFF	CFAP57	CNOT3	RAB3C
LDB1	SLC25A41	TNPO3	CCER2	C1orf131	TRANK1
FAM171A1	CTSW	LRRC3B	ATP6V1C2	NRBP1	ANO2
DCUN1D1	XAF1	ALS2	CD74	KIDINS220	PRSS27
SLC4A2	ZNF862	CBFA2T2	KYNU	ARIH1	EPHX3
SKIL	PIPOX	KIAA0930	BFSP2	ANKRD40	IL25
REPS1	LRCH3	HSD17B4	NPB	UBE2N	CYTIP
FAR1	NUDT13	PAXBP1	CPXM2	ECH1	MOS
PIAS3	MTHFSD	LRRFIP1	SULT1B1	NDST1	IHH
RBM47	ANXA3	ATF6	IFITM2	PACSIN2	SERPINF2
CREB3L1	HELQ	RPL7L1	ZNF628	ZC3H13	SLC27A2
BEND4	COMMD10	MAPKAP1	ALDH1A3	KIAA0355	IFI44L
YWHAE	WDR83	YTHDC1	RILP	TRPC4AP	LALBA
PDZRN3	SERPINB2	LNPEP	ROM1	NIPBL	CYP4F3
FAM196B	CACNA1S	FAM19A5	RAD54L	EFNA5	PPM1N
PPP2R2B	RBM28	CCDC93	RAD51AP2	HMGA1	ZDHHC22
PSMA3	CEP78	SNX29	CAPS	RCAN1	NPTX2
SNX2	KIR3DL2	ITPR2	ICAM1	LTBP3	CLDN4
ARHGEF17	CSAD	CXXC4	APOM	IK	CAMP
EOMES	CST9L	PHF20	NFKB2	COPE	CNGB3
CTBP1	DENND2C	ZNF300	ZNF763	GATAD1	ITK
RBM14-RBM4	CCNB2	EPG5	PNPO	CDC123	GUCY2D
HSPA12A	SCRN2	KPNA5	TTC29	GOLGA6B	HOXD8
HP1BP3	OC90	DHX36	ANKRD65	GOLGA8A	CEACAM16
ZMAT2	OC90	KPNA3	GMFG	GOLGA6L6	SSTR3
IKZF3	CD55	ASXL1	BMP8B	GOLGA6L10	TMEM169
PPP2R5B	FAM86C1	IDH1	RPEL1	GOLGA8G	TSHB
AMIGO1	FKBP15	SMC3	SGMS2	GOLGA6L1	TPSAB1
CNP	CLCN2	CASD1	EMP3	GOLGA6L9	TPSD1
CS	FLII	SCFD1	CEBPB	GOLGA8F	ANKEF1
HEXIM1	CLEC7A	MAT2A	FAM162B	GOLGA2	CDCP1
ASB7	PROX2	ZDHHC2	TEAD4	GOLGA6A	MFSD6L
GGT7	RNF207	VWA8	ZGPAT	GOLGA8B	CDKL4
PPP2R1A	EQTN	YTHDF3	SULT1E1	GOLGA6D	TMEM132E
CCT7	C14orf79	CLOCK	NHLRC1	GOLGA6C	NTNG1
CHMP6	PRODH	CSPP1	TRABD2B	LTBP4	MPZ
NDEL1	SLC9A9	SNCAIP	TNNT1	DOCK1	AJAP1
TRIB2	ZMYND15	KLF13	SH3BP1	MRPS9	C17orf78
CCND3	CDC20B	APPL1	BIRC3	TMEM184B	ANO7
DYNC1LI2	KLRG2	CHD1	ALOX5	RNF40	SLCO1A2
EHD1	ART1	EPM2AIP1	CDC20	SBF2	MAFA
PLCB1	PGM2	MSL1	CHRNB4	PREP	SERPINA1
C6orf62	POLR3C	ST13	NOXO1	PGRMC2	GIPC3
KCNA4	ZNF546	PDZD8	TRDN	TXNDC17	TMEM190
GAB2	TBC1D9B	EHMT1	KIRREL2	SGTA	FAM162B
PANK4	P2RX4	ZNF248	ASPDH	CDK2	BLNK
ELF3	CCDC69	PRKD1	FXYD5	RNF7	KIF12
CDK6	GYG1	YME1L1	CPM	ARL8B	IDO2
YWHAB	TXLNB	PNMA1	EIF3CL	RARS	WNT10A
PRPF31	BANK1	SDCBP	GPR132	RNF14	SLC6A20
SEC62	FNDC1	SNX27	CRABP1	SH3PXD2B	MBOAT4
FOSL2	BPIFB2	USP31	TAS2R5	QARS	SLC13A3
PWWP2A	MDM1	RBFOX3	BIRC5	GLUD1	C11orf80
PPP6R1	CYP4X1	AGO3	PPL	RAB40C	CEBPE
PDLIM4	MEI1	ARHGAP44	RAB38	KANSL3	TSSK2
CSTF3	GJA9	UBE4A	C1QTNF1	TM9SF4	CXCL10
BICD2	CASP10	ZNF337	HSBP1L1	TACC1	PRSS48
LASP1	PRKAG3	PFKM	GABRD	ARL6IP5	MMP9
SRSF1	LSG1	ATXN2	HSF5	DCN	ORM1
SENP2	PCDHB13	CNTNAP4	ST6GALNAC1	UBN1	ORM2
NOVA2	RPH3AL	TARBP1	ABCA4	SIK1	RGS20
SHH	ASPSCR1	CD200	CRABP2	EEF1D	RUNX3
FZD5	NIPAL2	FAM126B	TEKT3	SRI	DEFB124
HSF5	WDR60	SPG11	PEBP4	CAV3	KCNC4
PLAGL2	MISP	USP10	C2	MARK3	TUSC5
UBQLN4	SLC26A8	GLCE	CILP	CTSZ	ZYG11A
PSMA1	SYNE4	SCG3	AKR7L	PPARGC1A	F7
FOXP4	KIF12	LTN1	TRIM7	YTHDF3	ADORA3
PSMA2	TCTN3	RAI14	ABCC12	LRRFIP2	COL19A1
SEL1L	CAST	RPL24	MROH6	AP2A1	KCNT1
SS18L1	AIRE	ITM2B	MEIG1	WBP1L	USH1G
RPL18A	C7orf57	CCDC6	AZU1	ANKHD1	TLR1
AMD1	MCCC1	RAP1GAP2	44265	HIP1	CPA6
SND1	SLCO1C1	NARS	TCF7	EP300	THPO
[truncated: 2,616 more rows]

## Sheet: STable 10
Supplementary Table 10. Enrichment correlation estimates in high/low-pLI genes
Trait1	Trait2	Variant class	gene set	ρ	s.e.	s.e. method	pval	qval	FDR<0.05
DD	ASD	LoF	High-pLI	0.854884	0.0261794	FisherInfo	6.83647e-234	8.20377e-232	*
DD	ASD	Dmis	High-pLI	0.618574	0.0297907	FisherInfo	9.16154e-96	6.59631e-94	*
DD	ASD	Tmis	High-pLI	0.689414	0.0728231	FisherInfo	2.88102e-21	9.42879e-20	*
DD	ASD	synonymous	High-pLI	0.328239	0.299185	FisherInfo	0.272592	1.53333
DD	ASD	LoF	Low-pLI	0.198334	0.0906718	FisherInfo	0.0287144	0.323037
DD	ASD	Dmis	Low-pLI	0.852111	0.131007	FisherInfo	7.80421e-11	2.0068e-09	*
DD	ASD	Tmis	Low-pLI	0.24658	0.171606	FisherInfo	0.150747	1.04363
DD	ASD	synonymous	Low-pLI	0.369952	0.266986	FisherInfo	0.165851	1.10567
DD	SCZ	LoF	High-pLI	0.535105	0.183827	FisherInfo	0.00360362	0.0518922
DD	SCZ	Dmis	High-pLI	0.0147448	0.0430311	Jackknife	0.731859	1.85542
DD	SCZ	Tmis	High-pLI	0.322337	0.279256	FisherInfo	0.248389	1.44226
DD	SCZ	synonymous	High-pLI	0.00665314	0.174711	Jackknife	0.969623	1.29283
DD	SCZ	LoF	Low-pLI	-0.030401	0.465531	FisherInfo	0.947932	1.42785
DD	SCZ	Dmis	Low-pLI	0.00795897	0.0117729	Jackknife	0.499015	1.8713
DD	SCZ	Tmis	Low-pLI	0.00647302	0.238081	Jackknife	0.97831	1.25335
DD	SCZ	synonymous	Low-pLI	0.00169122	1.92995	FisherInfo	0.999301	1.01053
ASD	SCZ	LoF	High-pLI	0.680647	0.224505	FisherInfo	0.00243122	0.0380539	*
ASD	SCZ	Dmis	High-pLI	0.452624	0.844007	FisherInfo	0.591765	1.9021
ASD	SCZ	Tmis	High-pLI	0.355763	1.4336	FisherInfo	0.80401	1.71268
ASD	SCZ	synonymous	High-pLI	0.0200298	0.384859	Jackknife	0.958493	1.38023
ASD	SCZ	LoF	Low-pLI	0.41711	0.414206	FisherInfo	0.313929	1.63789
ASD	SCZ	Dmis	Low-pLI	0.197712	1.24774	FisherInfo	0.874098	1.68276
ASD	SCZ	Tmis	Low-pLI	0.429443	0.675167	FisherInfo	0.524741	1.78214
ASD	SCZ	synonymous	Low-pLI	0.289563	0.595859	FisherInfo	0.626996	1.94585
DD	CHD	LoF	High-pLI	0.594439	0.0425658	FisherInfo	2.5428e-44	1.01712e-42	*
DD	CHD	Dmis	High-pLI	0.454669	0.0436193	FisherInfo	1.93577e-25	6.96877e-24	*
DD	CHD	Tmis	High-pLI	0.507404	0.0778211	FisherInfo	7.02431e-11	2.0068e-09	*
DD	CHD	synonymous	High-pLI	0.000868433	0.0168108	Jackknife	0.9588	1.37517
DD	CHD	LoF	Low-pLI	0.0604714	0.0736767	FisherInfo	0.411779	1.78603
DD	CHD	Dmis	Low-pLI	0.257121	0.248449	FisherInfo	0.300714	1.61578
DD	CHD	Tmis	Low-pLI	0.138174	0.253496	FisherInfo	0.585703	1.91685
DD	CHD	synonymous	Low-pLI	0.00670014	1.23897	FisherInfo	0.995685	1.07319
ASD	CHD	LoF	High-pLI	0.373506	0.125704	FisherInfo	0.00296528	0.0444791	*
ASD	CHD	Dmis	High-pLI	0.0142105	0.127905	FisherInfo	0.911535	1.60074
ASD	CHD	Tmis	High-pLI	0.121206	0.828671	FisherInfo	0.883711	1.66563
ASD	CHD	synonymous	High-pLI	0.259886	0.626741	FisherInfo	0.678389	1.93825
ASD	CHD	LoF	Low-pLI	0.472976	0.383686	FisherInfo	0.217682	1.39938
ASD	CHD	Dmis	Low-pLI	0.0311259	0.459553	FisherInfo	0.946	1.44305
ASD	CHD	Tmis	Low-pLI	0.012276	0.566912	FisherInfo	0.982724	1.21574
ASD	CHD	synonymous	Low-pLI	-0.0164975	0.153245	Jackknife	0.91427	1.56732
SCZ	CHD	LoF	High-pLI	0.175992	0.271351	FisherInfo	0.516611	1.77124
SCZ	CHD	Dmis	High-pLI	-0.694747	0.736164	FisherInfo	0.345303	1.59371
SCZ	CHD	Tmis	High-pLI	-0.316346	1.70927	FisherInfo	0.853169	1.70634
SCZ	CHD	synonymous	High-pLI	0.23862	0.403109	Jackknife	0.553885	1.82934
SCZ	CHD	LoF	Low-pLI	-0.375627	0.579094	FisherInfo	0.516567	1.78812
SCZ	CHD	Dmis	Low-pLI	-0.122206	0.134851	Jackknife	0.364813	1.66244
SCZ	CHD	Tmis	Low-pLI	0.0295652	0.322618	Jackknife	0.926983	1.5308
SCZ	CHD	synonymous	Low-pLI	0.396491	1.27881	FisherInfo	0.756526	1.79177
DD	ID	LoF	High-pLI	0.978197	0.0145086	FisherInfo	0	0	*
DD	ID	Dmis	High-pLI	0.936404	0.0559902	FisherInfo	8.70119e-63	4.4749e-61	*
DD	ID	Tmis	High-pLI	0.999955	0.00167185	FisherInfo	0	0	*
DD	ID	synonymous	High-pLI	0.0316326	0.182945	Jackknife	0.862724	1.71592
DD	ID	LoF	Low-pLI	0.99005	0.0417568	FisherInfo	2.84924e-124	2.56432e-122	*
DD	ID	Dmis	Low-pLI	0.870377	0.36694	FisherInfo	0.0176928	0.235904
DD	ID	Tmis	Low-pLI	0.601894	0.569181	FisherInfo	0.290296	1.58343
DD	ID	synonymous	Low-pLI	0.0345391	0.0187588	FisherInfo	0.0655886	0.5759
ASD	ID	LoF	High-pLI	0.899254	0.0456758	FisherInfo	2.74638e-86	1.64783e-84	*
ASD	ID	Dmis	High-pLI	0.707802	0.121062	FisherInfo	5.01749e-09	1.12893e-07	*
ASD	ID	Tmis	High-pLI	0.223684	0.885615	FisherInfo	0.800597	1.71557
ASD	ID	synonymous	High-pLI	-0.000123976	0.0352489	Jackknife	0.997194	1.04662
ASD	ID	LoF	Low-pLI	0.856973	0.234826	FisherInfo	0.000262853	0.00498038	*
ASD	ID	Dmis	Low-pLI	0.476456	0.481515	Jackknife	0.322421	1.61211
ASD	ID	Tmis	Low-pLI	0.235391	0.572586	FisherInfo	0.680998	1.91531
ASD	ID	synonymous	Low-pLI	0.016462	0.48886	Jackknife	0.973137	1.27392
SCZ	ID	LoF	High-pLI	0.403707	0.213263	FisherInfo	0.0583584	0.552869
SCZ	ID	Dmis	High-pLI	0.484202	0.894267	FisherInfo	0.588197	1.90766
SCZ	ID	Tmis	High-pLI	0.296208	0.571584	Jackknife	0.604303	1.90832
SCZ	ID	synonymous	High-pLI	0.00670332	0.115421	Jackknife	0.953687	1.40134
SCZ	ID	LoF	Low-pLI	-0.122339	1.55936	FisherInfo	0.937467	1.49995
SCZ	ID	Dmis	Low-pLI	-0.000267404	0.115783	Jackknife	0.998157	1.03258
SCZ	ID	Tmis	Low-pLI	0.511439	1.42725	FisherInfo	0.720091	1.85166
SCZ	ID	synonymous	Low-pLI	-0.378918	0.715667	FisherInfo	0.596485	1.90031
CHD	ID	LoF	High-pLI	0.573169	0.115535	FisherInfo	7.01249e-07	1.485e-05	*
CHD	ID	Dmis	High-pLI	0.198776	0.203568	FisherInfo	0.328837	1.57842
CHD	ID	Tmis	High-pLI	0.461976	0.384731	FisherInfo	0.229838	1.45161
CHD	ID	synonymous	High-pLI	0.332289	1.38553	FisherInfo	0.810464	1.70624
CHD	ID	LoF	Low-pLI	0.86062	0.379651	FisherInfo	0.0233981	0.280777
CHD	ID	Dmis	Low-pLI	-0.581404	1.44536	FisherInfo	0.687496	1.8893
CHD	ID	Tmis	Low-pLI	0.530114	0.669834	FisherInfo	0.428704	1.79458
CHD	ID	synonymous	Low-pLI	0.00240615	0.590891	Jackknife	0.996751	1.05538
DD	TD	LoF	High-pLI	0.116249	0.303622	FisherInfo	0.701814	1.85774
DD	TD	Dmis	High-pLI	0.00628538	0.177887	FisherInfo	0.971814	1.27684
DD	TD	Tmis	High-pLI	0.00336268	0.00554421	Jackknife	0.544168	1.83085
DD	TD	synonymous	High-pLI	-0.00118812	0.0115556	Jackknife	0.918108	1.55905
DD	TD	LoF	Low-pLI	0.178919	0.368133	Jackknife	0.626955	1.96264
DD	TD	Dmis	Low-pLI	0.0360131	0.296766	Jackknife	0.903412	1.61805
DD	TD	Tmis	Low-pLI	0.00187354	0.000902314	Jackknife	0.0378596	0.413014
DD	TD	synonymous	Low-pLI	-0.0006537	0.0115915	Jackknife	0.955027	1.39194
ASD	TD	LoF	High-pLI	0.156822	0.355912	FisherInfo	0.659488	1.97846
ASD	TD	Dmis	High-pLI	0.00200447	0.352485	Jackknife	0.995463	1.07618
ASD	TD	Tmis	High-pLI	0.000551143	0.0018373	Jackknife	0.764196	1.76353
ASD	TD	synonymous	High-pLI	0.00656475	0.503582	FisherInfo	0.989599	1.15667
ASD	TD	LoF	Low-pLI	0.378042	1.12159	FisherInfo	0.736073	1.82749
ASD	TD	Dmis	Low-pLI	0.226723	0.505658	Jackknife	0.653885	1.9949
ASD	TD	Tmis	Low-pLI	0.00838825	0.00529151	Jackknife	0.112915	0.903317
ASD	TD	synonymous	Low-pLI	-0.0024782	0.0632692	Jackknife	0.968756	1.30131
SCZ	TD	LoF	High-pLI	-0.495284	0.426168	FisherInfo	0.245163	1.44686
SCZ	TD	Dmis	High-pLI	-0.118396	0.398524	Jackknife	0.7664	1.75735
SCZ	TD	Tmis	High-pLI	-0.000453945	0.00417204	Jackknife	0.913356	1.58081
SCZ	TD	synonymous	High-pLI	-0.00382609	0.590501	Jackknife	0.99483	1.08857
SCZ	TD	LoF	Low-pLI	-0.231074	0.323941	Jackknife	0.475648	1.88168
SCZ	TD	Dmis	Low-pLI	-0.00206254	0.0412334	Jackknife	0.960106	1.37158
SCZ	TD	Tmis	Low-pLI	0.00273073	0.0396777	Jackknife	0.945131	1.44786
SCZ	TD	synonymous	Low-pLI	-0.134971	0.519989	Jackknife	0.795199	1.73498
CHD	TD	LoF	High-pLI	0.0947679	1.27595	FisherInfo	0.940794	1.47898
CHD	TD	Dmis	High-pLI	-0.394919	1.23267	FisherInfo	0.748682	1.8089
CHD	TD	Tmis	High-pLI	0.00314642	0.00805756	Jackknife	0.696172	1.88438
CHD	TD	synonymous	High-pLI	0.242314	0.370374	Jackknife	0.512955	1.81043
CHD	TD	LoF	Low-pLI	0.545133	0.908686	FisherInfo	0.548564	1.82855
CHD	TD	Dmis	Low-pLI	0.0399305	0.734589	Jackknife	0.95665	1.38311
CHD	TD	Tmis	Low-pLI	0.00939954	0.00650029	Jackknife	0.148172	1.06684
CHD	TD	synonymous	Low-pLI	0.00374949	0.197896	Jackknife	0.984884	1.1938
ID	TD	LoF	High-pLI	0.349856	0.23166	FisherInfo	0.130989	1.00332
ID	TD	Dmis	High-pLI	0.526099	0.766534	FisherInfo	0.492502	1.86632
ID	TD	Tmis	High-pLI	-0.0117405	0.0164886	Jackknife	0.47644	1.86433
ID	TD	synonymous	High-pLI	5.51e-05	0.575676	Jackknife	0.999924	0.999924
ID	TD	LoF	Low-pLI	-0.0766858	0.272137	Jackknife	0.778104	1.75073
ID	TD	Dmis	Low-pLI	-0.00127331	0.614371	Jackknife	0.998346	1.02981
ID	TD	Tmis	Low-pLI	-0.00358971	0.0208415	Jackknife	0.86325	1.70753
ID	TD	synonymous	Low-pLI	-0.000199846	0.583906	Jackknife	0.999727	1.00251
DD	EP	LoF	High-pLI	0.445519	0.223969	FisherInfo	0.0466792	0.480129
DD	EP	Dmis	High-pLI	0.878676	0.0533201	FisherInfo	5.17085e-61	2.32688e-59	*
DD	EP	Tmis	High-pLI	0.00833159	0.115467	Jackknife	0.942478	1.4688
DD	EP	synonymous	High-pLI	0.00168429	0.064187	Jackknife	0.979066	1.24545
DD	EP	LoF	Low-pLI	0.00211045	0.164101	Jackknife	0.989739	1.15309
DD	EP	Dmis	Low-pLI	-0.018797	1.52481	FisherInfo	0.990164	1.13885
DD	EP	Tmis	Low-pLI	-0.000371962	0.00478266	Jackknife	0.938009	1.48759
DD	EP	synonymous	Low-pLI	0.00129189	0.00650552	Jackknife	0.842588	1.69459
ASD	EP	LoF	High-pLI	-0.0149286	0.405811	FisherInfo	0.970655	1.28943
ASD	EP	Dmis	High-pLI	0.797775	0.122613	FisherInfo	7.69526e-11	2.0068e-09	*
ASD	EP	Tmis	High-pLI	0.0035624	0.0316087	Jackknife	0.910266	1.61426
ASD	EP	synonymous	High-pLI	-0.00271095	1.40805	FisherInfo	0.998464	1.01539
ASD	EP	LoF	Low-pLI	-0.0167849	0.211548	Jackknife	0.936759	1.50551
ASD	EP	Dmis	Low-pLI	-0.299032	0.431877	Jackknife	0.488686	1.87156
ASD	EP	Tmis	Low-pLI	0.00392448	0.0278868	Jackknife	0.888084	1.66516
ASD	EP	synonymous	Low-pLI	-0.002943	0.038061	Jackknife	0.938366	1.48163
SCZ	EP	LoF	High-pLI	0.0673922	0.435057	FisherInfo	0.876897	1.67916
SCZ	EP	Dmis	High-pLI	-0.387111	0.328718	FisherInfo	0.238941	1.48308
SCZ	EP	Tmis	High-pLI	-0.000561572	0.0575673	Jackknife	0.992217	1.11277
SCZ	EP	synonymous	High-pLI	-0.00627951	0.577564	Jackknife	0.991325	1.12225
SCZ	EP	LoF	Low-pLI	0.230083	0.895398	Jackknife	0.797209	1.71853
SCZ	EP	Dmis	Low-pLI	0.0176073	0.583221	Jackknife	0.975916	1.25925
SCZ	EP	Tmis	Low-pLI	0.000816717	0.106308	Jackknife	0.99387	1.09417
SCZ	EP	synonymous	Low-pLI	0.00642371	0.399408	Jackknife	0.987168	1.18067
CHD	EP	LoF	High-pLI	-0.514478	0.371013	FisherInfo	0.165538	1.12441
CHD	EP	Dmis	High-pLI	0.187066	0.164826	FisherInfo	0.256407	1.46518
CHD	EP	Tmis	High-pLI	0.00769682	0.266512	Jackknife	0.97696	1.25609
CHD	EP	synonymous	High-pLI	-0.16348	1.20879	FisherInfo	0.89242	1.65604
CHD	EP	LoF	Low-pLI	-0.00260837	0.245588	Jackknife	0.991526	1.11896
CHD	EP	Dmis	Low-pLI	0.373578	1.22205	Jackknife	0.759835	1.78785
CHD	EP	Tmis	Low-pLI	-0.0223711	0.169449	Jackknife	0.894967	1.64382
CHD	EP	synonymous	Low-pLI	0.000985165	0.31167	Jackknife	0.997478	1.04387
ID	EP	LoF	High-pLI	0.250385	0.262136	FisherInfo	0.33949	1.60811
ID	EP	Dmis	High-pLI	0.586131	0.311268	FisherInfo	0.059694	0.551022
ID	EP	Tmis	High-pLI	0.568435	0.791953	FisherInfo	0.472903	1.89161
ID	EP	synonymous	High-pLI	-0.0015415	0.581089	Jackknife	0.997883	1.03527
ID	EP	LoF	Low-pLI	-0.00165879	0.277527	Jackknife	0.995231	1.07917
ID	EP	Dmis	Low-pLI	-0.0216598	0.234568	Jackknife	0.926429	1.53693
ID	EP	Tmis	Low-pLI	-0.016142	0.28051	Jackknife	0.954111	1.39626
ID	EP	synonymous	Low-pLI	0.00433686	0.367152	Jackknife	0.990575	1.13569
TD	EP	LoF	High-pLI	0.375717	0.294248	FisherInfo	0.201648	1.31988
TD	EP	Dmis	High-pLI	-0.359168	1.19187	FisherInfo	0.763149	1.77247
TD	EP	Tmis	High-pLI	-0.000363807	0.017831	Jackknife	0.983722	1.20867
TD	EP	synonymous	High-pLI	0.00013885	0.246496	Jackknife	0.999551	1.00513
TD	EP	LoF	Low-pLI	0.105212	0.495656	Jackknife	0.831898	1.71133
TD	EP	Dmis	Low-pLI	-0.00302645	0.239153	Jackknife	0.989903	1.14587
TD	EP	Tmis	Low-pLI	0.000758072	0.0522806	Jackknife	0.988431	1.17051
TD	EP	synonymous	Low-pLI	-0.00113322	0.267371	Jackknife	0.996618	1.05836
DD	CP	LoF	High-pLI	0.619513	0.376988	FisherInfo	0.100317	0.820773
DD	CP	Dmis	High-pLI	0.298375	0.198899	FisherInfo	0.133579	1.00184
DD	CP	Tmis	High-pLI	0.0232978	0.235978	FisherInfo	0.921354	1.54994
DD	CP	synonymous	High-pLI	0.00113171	0.552129	FisherInfo	0.998365	1.02689
DD	CP	LoF	Low-pLI	-0.0304972	0.0902332	Jackknife	0.735377	1.83844
DD	CP	Dmis	Low-pLI	0.0159458	0.123169	Jackknife	0.896992	1.63917
DD	CP	Tmis	Low-pLI	0.00276221	0.0396417	Jackknife	0.944449	1.453
DD	CP	synonymous	Low-pLI	0.00107342	0.762	Jackknife	0.998876	1.01294
ASD	CP	LoF	High-pLI	0.867981	0.140657	FisherInfo	6.78998e-10	1.6296e-08	*
ASD	CP	Dmis	High-pLI	0.515597	0.198223	FisherInfo	0.00929282	0.12867
ASD	CP	Tmis	High-pLI	0.0160311	0.28964	FisherInfo	0.955861	1.38754
ASD	CP	synonymous	High-pLI	0.00131392	0.00129497	Jackknife	0.310278	1.64265
ASD	CP	LoF	Low-pLI	0.386759	0.39364	Jackknife	0.325845	1.60691
ASD	CP	Dmis	Low-pLI	0.0393168	0.319559	FisherInfo	0.90208	1.6319
ASD	CP	Tmis	Low-pLI	-0.010266	0.282859	FisherInfo	0.971048	1.2805
ASD	CP	synonymous	Low-pLI	-0.000264081	0.000113178	Jackknife	0.0196311	0.2524
SCZ	CP	LoF	High-pLI	0.555139	0.287905	FisherInfo	0.0538299	0.538299
SCZ	CP	Dmis	High-pLI	-0.0700117	0.957338	FisherInfo	0.941701	1.47397
SCZ	CP	Tmis	High-pLI	-0.00148098	0.346913	Jackknife	0.996594	1.06146
SCZ	CP	synonymous	High-pLI	-0.00591039	0.0163582	Jackknife	0.717867	1.85922
SCZ	CP	LoF	Low-pLI	-0.0508798	0.175959	Jackknife	0.772461	1.74897
SCZ	CP	Dmis	Low-pLI	-0.00193701	0.203528	Jackknife	0.992407	1.10609
SCZ	CP	Tmis	Low-pLI	-0.00195484	0.127037	Jackknife	0.987723	1.17742
SCZ	CP	synonymous	Low-pLI	0.0247057	0.154745	Jackknife	0.873153	1.68997
CHD	CP	LoF	High-pLI	0.853448	0.855664	FisherInfo	0.318565	1.63834
CHD	CP	Dmis	High-pLI	-0.385804	0.231973	FisherInfo	0.0962833	0.806093
CHD	CP	Tmis	High-pLI	-0.0187019	0.417215	Jackknife	0.964246	1.33511
CHD	CP	synonymous	High-pLI	0.00557273	0.0145675	Jackknife	0.702057	1.84482
CHD	CP	LoF	Low-pLI	-0.0160832	0.206444	Jackknife	0.937903	1.49401
CHD	CP	Dmis	Low-pLI	-0.00173501	0.156781	Jackknife	0.99117	1.12562
CHD	CP	Tmis	Low-pLI	0.00716724	1.14633	FisherInfo	0.995011	1.08219
CHD	CP	synonymous	Low-pLI	0.00212937	0.00280301	Jackknife	0.447451	1.83048
ID	CP	LoF	High-pLI	0.716506	0.210572	FisherInfo	0.00066732	0.0114398	*
ID	CP	Dmis	High-pLI	0.793611	0.177839	FisherInfo	8.09979e-06	0.000161996	*
ID	CP	Tmis	High-pLI	0.62833	1.57608	FisherInfo	0.690139	1.8822
ID	CP	synonymous	High-pLI	0.00142606	0.00351681	Jackknife	0.685112	1.89723
ID	CP	LoF	Low-pLI	0.00623636	0.286972	Jackknife	0.982662	1.21986
ID	CP	Dmis	Low-pLI	0.000660067	0.328786	FisherInfo	0.998398	1.02109
ID	CP	Tmis	Low-pLI	-0.491565	0.742756	FisherInfo	0.508092	1.82913
ID	CP	synonymous	Low-pLI	-0.00034386	0.000525547	Jackknife	0.512925	1.82825
TD	CP	LoF	High-pLI	0.0587879	0.723302	FisherInfo	0.935222	1.50977
TD	CP	Dmis	High-pLI	0.146263	1.2102	FisherInfo	0.903803	1.61074
TD	CP	Tmis	High-pLI	0.00720644	0.0585957	Jackknife	0.902118	1.62381
TD	CP	synonymous	High-pLI	0.0024961	0.00768402	Jackknife	0.7453	1.81289
TD	CP	LoF	Low-pLI	-0.00977589	0.253857	Jackknife	0.969282	1.29718
TD	CP	Dmis	Low-pLI	-0.000274172	0.135537	Jackknife	0.998386	1.02399
TD	CP	Tmis	Low-pLI	-0.00515253	0.128945	Jackknife	0.968126	1.31519
TD	CP	synonymous	Low-pLI	-0.000217036	0.0183938	Jackknife	0.990586	1.1321
EP	CP	LoF	High-pLI	0.392194	0.455344	FisherInfo	0.389065	1.75079
EP	CP	Dmis	High-pLI	0.0314328	0.747181	FisherInfo	0.966444	1.32289
EP	CP	Tmis	High-pLI	0.00393553	0.335107	Jackknife	0.99063	1.12857
EP	CP	synonymous	High-pLI	-0.0346151	1.38056	FisherInfo	0.979996	1.23789
EP	CP	LoF	Low-pLI	-0.00509541	0.336652	Jackknife	0.987924	1.17377
EP	CP	Dmis	Low-pLI	0.00470161	0.202329	Jackknife	0.981461	1.22258
EP	CP	Tmis	Low-pLI	0.00046718	0.155333	Jackknife	0.9976	1.03797
EP	CP	synonymous	Low-pLI	-0.000512252	0.000659978	Jackknife	0.437651	1.81097
DD	CH	LoF	High-pLI	0.434315	0.136654	FisherInfo	0.00148191	0.0242495	*
DD	CH	Dmis	High-pLI	0.045333	0.475782	FisherInfo	0.924092	1.54732
DD	CH	Tmis	High-pLI	0.216091	0.321096	FisherInfo	0.50096	1.85923
DD	CH	synonymous	High-pLI	-0.000547965	0.00371225	Jackknife	0.882651	1.67239
DD	CH	LoF	Low-pLI	0.0488339	0.759482	FisherInfo	0.948732	1.41719
DD	CH	Dmis	Low-pLI	0.00916116	1.20605	FisherInfo	0.993939	1.09091
DD	CH	Tmis	Low-pLI	-0.00859752	0.533167	FisherInfo	0.987134	1.18456
DD	CH	synonymous	Low-pLI	0.00462583	0.0662989	Jackknife	0.944375	1.45912
ASD	CH	LoF	High-pLI	0.575706	0.312104	FisherInfo	0.0650964	0.585868
ASD	CH	Dmis	High-pLI	-0.0441799	0.327413	FisherInfo	0.892662	1.64799
ASD	CH	Tmis	High-pLI	-0.293285	0.175845	FisherInfo	0.0953433	0.817228
ASD	CH	synonymous	High-pLI	0.000540144	0.0116771	Jackknife	0.963106	1.35437
ASD	CH	LoF	Low-pLI	0.201558	1.98873	FisherInfo	0.919273	1.5537
ASD	CH	Dmis	Low-pLI	-0.00259272	0.335057	Jackknife	0.993826	1.09748
ASD	CH	Tmis	Low-pLI	0.088297	0.802969	FisherInfo	0.912439	1.59455
ASD	CH	synonymous	Low-pLI	0.00443202	0.0665614	Jackknife	0.946912	1.4323
SCZ	CH	LoF	High-pLI	0.0733339	0.29749	FisherInfo	0.805288	1.70532
SCZ	CH	Dmis	High-pLI	-0.00349353	0.134997	Jackknife	0.979354	1.24143
SCZ	CH	Tmis	High-pLI	-0.449837	0.202626	FisherInfo	0.0264162	0.306769
SCZ	CH	synonymous	High-pLI	0.0011897	0.0647169	Jackknife	0.985333	1.19034
SCZ	CH	LoF	Low-pLI	-0.0847495	0.406169	Jackknife	0.834717	1.70738
SCZ	CH	Dmis	Low-pLI	0.000857595	0.0652952	Jackknife	0.989521	1.16035
SCZ	CH	Tmis	Low-pLI	0.0610226	1.0264	FisherInfo	0.952591	1.40546
SCZ	CH	synonymous	Low-pLI	0.330556	0.226269	Jackknife	0.144043	1.05828
CHD	CH	LoF	High-pLI	-0.801525	0.417398	FisherInfo	0.0548214	0.533397
CHD	CH	Dmis	High-pLI	-0.0487831	0.685115	Jackknife	0.943235	1.46364
CHD	CH	Tmis	High-pLI	-0.16948	0.207492	FisherInfo	0.414042	1.77446
CHD	CH	synonymous	High-pLI	0.00642699	0.0774188	Jackknife	0.933839	1.51433
CHD	CH	LoF	Low-pLI	-0.0185356	0.410069	Jackknife	0.963947	1.33985
CHD	CH	Dmis	Low-pLI	0.0277614	0.565688	Jackknife	0.960859	1.36723
CHD	CH	Tmis	Low-pLI	-0.36787	0.869618	FisherInfo	0.672277	1.95177
CHD	CH	synonymous	Low-pLI	0.00247225	0.0504482	Jackknife	0.960915	1.36193
ID	CH	LoF	High-pLI	0.593258	0.164627	FisherInfo	0.000313774	0.00564794	*
ID	CH	Dmis	High-pLI	-0.468046	1.21588	FisherInfo	0.700279	1.88135
ID	CH	Tmis	High-pLI	-0.162534	0.399927	FisherInfo	0.684442	1.91007
ID	CH	synonymous	High-pLI	-0.00159622	0.0768239	Jackknife	0.983423	1.21244
ID	CH	LoF	Low-pLI	-0.0825533	0.253279	Jackknife	0.744471	1.82319
ID	CH	Dmis	Low-pLI	-0.00304197	0.0945961	Jackknife	0.974347	1.2663
ID	CH	Tmis	Low-pLI	-0.323295	0.495399	FisherInfo	0.514017	1.79656
ID	CH	synonymous	Low-pLI	0.000929988	0.0385619	Jackknife	0.980759	1.23452
TD	CH	LoF	High-pLI	0.364238	0.310858	FisherInfo	0.241311	1.4724
TD	CH	Dmis	High-pLI	0.00926906	0.221183	Jackknife	0.966573	1.31805
TD	CH	Tmis	High-pLI	-0.083207	0.254462	Jackknife	0.743674	1.83372
TD	CH	synonymous	High-pLI	0.000204599	0.0659511	Jackknife	0.997525	1.0409
TD	CH	LoF	Low-pLI	0.0767872	0.29793	Jackknife	0.796611	1.72759
TD	CH	Dmis	Low-pLI	-0.00131047	0.0754343	Jackknife	0.98614	1.18733
TD	CH	Tmis	Low-pLI	0.120266	1.09655	Jackknife	0.912666	1.58725
TD	CH	synonymous	Low-pLI	0.00213214	0.332868	Jackknife	0.994889	1.08533
EP	CH	LoF	High-pLI	-0.164072	0.738659	FisherInfo	0.824219	1.70528
EP	CH	Dmis	High-pLI	0.200835	0.588232	FisherInfo	0.732786	1.84478
EP	CH	Tmis	High-pLI	0.513122	1.64062	FisherInfo	0.754462	1.81071
EP	CH	synonymous	High-pLI	-0.000838408	0.0587958	Jackknife	0.988623	1.16309
EP	CH	LoF	Low-pLI	0.00615512	0.493896	Jackknife	0.990057	1.14237
EP	CH	Dmis	Low-pLI	0.00288717	0.145057	Jackknife	0.98412	1.20096
EP	CH	Tmis	Low-pLI	-0.177069	0.675788	Jackknife	0.793307	1.75209
EP	CH	synonymous	Low-pLI	-0.000864137	0.0187072	Jackknife	0.963157	1.34917
CP	CH	LoF	High-pLI	0.143358	0.332459	FisherInfo	0.66632	1.96619
CP	CH	Dmis	High-pLI	-0.132044	0.160388	Jackknife	0.410349	1.80153
CP	CH	Tmis	High-pLI	-0.0193175	0.287824	FisherInfo	0.94649	1.43771
CP	CH	synonymous	High-pLI	0.000183895	0.0078942	Jackknife	0.981415	1.22677
CP	CH	LoF	Low-pLI	-0.00517037	0.491239	Jackknife	0.991602	1.11555
CP	CH	Dmis	Low-pLI	-0.00126269	0.252906	Jackknife	0.996016	1.06716
CP	CH	Tmis	Low-pLI	0.192312	0.93867	FisherInfo	0.837669	1.69416
CP	CH	synonymous	Low-pLI	0.00485519	0.0137412	Jackknife	0.72384	1.8481
DD	Ctrl	LoF	High-pLI	0.147504	0.150795	Jackknife	0.327987	1.59561
DD	Ctrl	Dmis	High-pLI	-0.00418193	0.0868744	Jackknife	0.961607	1.35756
DD	Ctrl	Tmis	High-pLI	0.00904291	0.0807057	FisherInfo	0.910785	1.60727
DD	Ctrl	synonymous	High-pLI	-0.0079675	0.0646353	Jackknife	0.901894	1.63981
DD	Ctrl	LoF	Low-pLI	0.534237	1.39934	FisherInfo	0.702626	1.83294
DD	Ctrl	Dmis	Low-pLI	-0.00657829	1.66183	FisherInfo	0.996842	1.05238
DD	Ctrl	Tmis	Low-pLI	0.0154144	0.109658	FisherInfo	0.888211	1.65677
DD	Ctrl	synonymous	Low-pLI	0.0119534	0.454218	FisherInfo	0.979005	1.24979
ASD	Ctrl	LoF	High-pLI	-0.475059	0.446917	FisherInfo	0.287797	1.59395
ASD	Ctrl	Dmis	High-pLI	0.27969	0.655143	FisherInfo	0.669441	1.95934
ASD	Ctrl	Tmis	High-pLI	0.14686	0.977411	FisherInfo	0.880564	1.67727
ASD	Ctrl	synonymous	High-pLI	-0.00668264	0.18189	Jackknife	0.970692	1.28474
ASD	Ctrl	LoF	Low-pLI	0.809821	0.52362	FisherInfo	0.121964	0.954504
ASD	Ctrl	Dmis	Low-pLI	0.426045	0.609885	FisherInfo	0.484823	1.87674
ASD	Ctrl	Tmis	Low-pLI	0.00109815	1.66548	FisherInfo	0.999474	1.00787
ASD	Ctrl	synonymous	Low-pLI	-0.118746	0.530967	FisherInfo	0.823036	1.72263
SCZ	Ctrl	LoF	High-pLI	0.49983	0.527462	FisherInfo	0.343326	1.60516
SCZ	Ctrl	Dmis	High-pLI	-0.00806344	0.0912165	Jackknife	0.92956	1.5211
SCZ	Ctrl	Tmis	High-pLI	0.478054	1.08047	FisherInfo	0.658162	1.99108
SCZ	Ctrl	synonymous	High-pLI	-0.00948183	0.285046	Jackknife	0.973464	1.26974
SCZ	Ctrl	LoF	Low-pLI	-0.496177	1.70534	FisherInfo	0.771086	1.7569
SCZ	Ctrl	Dmis	Low-pLI	-0.0747032	1.16437	FisherInfo	0.948845	1.4115
SCZ	Ctrl	Tmis	Low-pLI	0.00948566	0.208016	Jackknife	0.963629	1.3446
SCZ	Ctrl	synonymous	Low-pLI	0.00559028	0.609461	FisherInfo	0.992682	1.10298
CHD	Ctrl	LoF	High-pLI	0.47049	0.403417	FisherInfo	0.243508	1.46105
CHD	Ctrl	Dmis	High-pLI	0.304356	0.734786	FisherInfo	0.67872	1.92393
CHD	Ctrl	Tmis	High-pLI	0.607483	0.80723	FisherInfo	0.451719	1.82718
CHD	Ctrl	synonymous	High-pLI	0.00357519	0.280109	Jackknife	0.989816	1.14946
CHD	Ctrl	LoF	Low-pLI	0.847278	0.365793	FisherInfo	0.0205432	0.255019
CHD	Ctrl	Dmis	Low-pLI	-0.34357	1.09958	FisherInfo	0.754696	1.79927
CHD	Ctrl	Tmis	Low-pLI	0.0268325	1.85535	FisherInfo	0.988461	1.16671
CHD	Ctrl	synonymous	Low-pLI	0.062302	1.56755	FisherInfo	0.968297	1.30557
ID	Ctrl	LoF	High-pLI	-0.421121	0.636281	FisherInfo	0.508069	1.84752
ID	Ctrl	Dmis	High-pLI	-0.898444	0.624397	FisherInfo	0.150179	1.06009
ID	Ctrl	Tmis	High-pLI	-0.0934138	0.349408	Jackknife	0.7892	1.75378
ID	Ctrl	synonymous	High-pLI	0.00680864	0.701357	Jackknife	0.992254	1.10935
ID	Ctrl	LoF	Low-pLI	-0.120983	1.87779	FisherInfo	0.948629	1.42294
ID	Ctrl	Dmis	Low-pLI	0.0299319	1.48688	FisherInfo	0.983939	1.20482
ID	Ctrl	Tmis	Low-pLI	0.0289119	0.937744	FisherInfo	0.975404	1.26311
ID	Ctrl	synonymous	Low-pLI	-0.0422883	0.476422	Jackknife	0.929271	1.52757
TD	Ctrl	LoF	High-pLI	0.156857	0.751835	FisherInfo	0.834736	1.69777
TD	Ctrl	Dmis	High-pLI	0.0156829	1.85757	FisherInfo	0.993264	1.10023
TD	Ctrl	Tmis	High-pLI	-0.229224	0.343996	Jackknife	0.505183	1.85577
TD	Ctrl	synonymous	High-pLI	0.000836279	0.4292	Jackknife	0.998445	1.01824
TD	Ctrl	LoF	Low-pLI	0.56597	1.35594	Jackknife	0.676385	1.94799
TD	Ctrl	Dmis	Low-pLI	-0.0113743	0.571874	Jackknife	0.984132	1.19692
TD	Ctrl	Tmis	Low-pLI	-0.00407731	1.10326	FisherInfo	0.997051	1.04953
TD	Ctrl	synonymous	Low-pLI	-0.136382	0.816716	FisherInfo	0.86738	1.70632
EP	Ctrl	LoF	High-pLI	-0.258732	0.59135	FisherInfo	0.661728	1.96878
EP	Ctrl	Dmis	High-pLI	-0.724509	0.72957	FisherInfo	0.32068	1.62598
EP	Ctrl	Tmis	High-pLI	0.0253539	0.407106	Jackknife	0.950341	1.40791
EP	Ctrl	synonymous	High-pLI	-0.0016905	0.356653	Jackknife	0.996218	1.06421
EP	Ctrl	LoF	Low-pLI	-0.146558	1.34735	FisherInfo	0.913381	1.57329
EP	Ctrl	Dmis	Low-pLI	-0.188526	0.846336	FisherInfo	0.823726	1.71411
EP	Ctrl	Tmis	Low-pLI	-0.00589505	0.246393	Jackknife	0.980912	1.23041
EP	Ctrl	synonymous	Low-pLI	-0.634799	0.781367	FisherInfo	0.41655	1.76421
CP	Ctrl	LoF	High-pLI	-0.0521158	1.31122	FisherInfo	0.968296	1.31048
CP	Ctrl	Dmis	High-pLI	-0.446837	1.48088	FisherInfo	0.762852	1.78329
CP	Ctrl	Tmis	High-pLI	0.347888	0.419966	Jackknife	0.407461	1.81094
CP	Ctrl	synonymous	High-pLI	-0.00806052	0.0870159	Jackknife	0.926195	1.54366
CP	Ctrl	LoF	Low-pLI	0.315322	0.650261	Jackknife	0.627737	1.9315
CP	Ctrl	Dmis	Low-pLI	0.238818	1.4756	FisherInfo	0.871428	1.70497
CP	Ctrl	Tmis	Low-pLI	-0.117175	0.72717	FisherInfo	0.871984	1.69683
CP	Ctrl	synonymous	Low-pLI	0.0922103	0.24007	Jackknife	0.700906	1.86908
CH	Ctrl	LoF	High-pLI	0.311193	1.11294	FisherInfo	0.779773	1.74359
CH	Ctrl	Dmis	High-pLI	0.00170969	0.323707	Jackknife	0.995786	1.0701
CH	Ctrl	Tmis	High-pLI	0.757926	0.375299	FisherInfo	0.0434324	0.459873
CH	Ctrl	synonymous	High-pLI	0.00934016	0.0900798	Jackknife	0.917417	1.56526
CH	Ctrl	LoF	Low-pLI	0.0721834	1.62083	FisherInfo	0.964478	1.33031
CH	Ctrl	Dmis	Low-pLI	-0.0329609	0.7523	Jackknife	0.965053	1.32603
CH	Ctrl	Tmis	Low-pLI	-0.136059	1.55622	FisherInfo	0.930331	1.51547
CH	Ctrl	synonymous	Low-pLI	-0.300508	1.15498	FisherInfo	0.794721	1.74451
The column of ρ, s.e., pval, and qval represent the estimated enrichment correlation, its corresponding standard error, p value, and q value for each trait pair respectively using EncoreDNM. The column of s.e. method represents the method in calculating the standard error of enrichment correlation.

[truncated: 10 more sheets: STable 11, STable 12, STable 13, STable 14, STable 15, STable 16, STable 17, STable 18, STable 19, STable 20]
